# Supplementary material for: Damage of aromatic amino acids by the atmospheric free radical oxidant NO3˙ in the presence of NO2˙, N2O4, O3 and O2
Source: Royal Society of Chemistry journal article supplement (doi:10.1039/c0ob01186j), 2011-01-01
Supplement: c0ob01186j.pdf [file c0ob01186j.pdf]

## Electronic Supplementary Information

# Damage of aromatic amino acids by the atmospheric free radical oxidant $\text{NO}_3^\bullet$ in the presence of $\text{NO}_2^\bullet$ , $\text{N}_2\text{O}_4$ , $\text{O}_3$ and $\text{O}_2$

Catrin Goeschen,<sup>a</sup> Natalia Wibowo,<sup>a</sup> Jonathan M. White,<sup>b</sup> and Uta Wille<sup>\*a</sup>

<sup>a</sup>ARC Centre of Excellence for Free Radical Chemistry and Biotechnology, School of Chemistry and BIO21 Molecular Science and Biotechnology Institute, The University of Melbourne, 30 Flemington Rd, Parkville, VIC 3010, Australia.

Fax: (+61) 03 9347 8189

E-mail: [uwille@unimelb.edu.au](mailto:uwille@unimelb.edu.au)

<sup>b</sup>School of Chemistry and BIO21 Molecular Science and Biotechnology Institute, The University of Melbourne, 30 Flemington Rd, Parkville, VIC 3010, Australia.

### Contents:

|       |                                                                                           |     |
|-------|-------------------------------------------------------------------------------------------|-----|
| 1.    | Experimental section.....                                                                 | S2  |
| 1.1   | General procedures.....                                                                   | S2  |
| 1.2   | Reaction of amino acids with $\text{NO}_3^\bullet$ .....                                  | S2  |
| 1.2.1 | Reaction of Phenylalanine <b>1a</b> with $\text{NO}_2^\bullet/\text{N}_2\text{O}_4$ ..... | S2  |
| 1.2.2 | Reaction of Phenylalanine <b>1a</b> with $\text{NO}_3^\bullet$ .....                      | S4  |
| 1.2.3 | Reaction of Tyrosine <b>2a</b> with $\text{NO}_3^\bullet$ .....                           | S18 |
| 1.2.4 | Reaction of <i>O</i> -Acetyltyrosine <b>3a</b> with $\text{NO}_3^\bullet$ .....           | S29 |
| 1.2.5 | Reaction of Tryptophan <b>5</b> with $\text{NO}_3^\bullet$ .....                          | S38 |
| 2.    | Crystallographic data .....                                                               | S49 |
| 2.1   | <b>12a</b> .....                                                                          | S49 |

## 1 Experimental section

### 1.1 General Procedures

Protection of the commercially available (Sigma-Aldrich), enantiomeric pure amino acids were performed according to literature procedures [A. J. Smallridge, M. A. Trehwella, and Z. Wang, *Aust. J. Chem.*, 2002, **55**, 259; F. Giacomina, A. Meetsma, L. Panella, L. Lefort, A. H. M. de Vries, and J. G. de Vries, *Angew. Chem., Int. Ed.*, 2007, **46**, 1497; K. Junge, G. Oehme, A. Monsees, T. Riermeier, U. Dingerdissen, and M. Beller, *Tetrahedron Lett.* 2002, **43**, 4977].

$^1\text{H}$  and  $^{13}\text{C}$  spectra were taken on a Varian Unity Inova 500 spectrometer [499.688 MHz ( $^1\text{H}$ ), 125.646 ( $^{13}\text{C}$ )] in deuterated chloroform ( $\text{CDCl}_3$ ). If possible the assignment of the chemical shifts was confirmed by utilising 2D NMR techniques.

GC/MS (EI, 70 eV) analysis was run on an Agilent 7890A GC / 5975C MSD, column from SUPELCO 30 m, 0.32 mm ID, 0.25  $\mu\text{m}$  film thickness fused silica capillary column. The temperature program used was  $70_5 \rightarrow 250_{17}$  heating rate  $5^\circ\text{C}/\text{min}$  (40 mins in total).

HR-MS was conducted by ionising the samples via ESI into a Thermo-Finnigan LTQ FT-ICR hybrid mass spectrometer or an Agilent 6520 LC/Q-TOF mass spectrometer with an electrospray ionizing source coupled to an Agilent 1100 LC system.

The crude products were purified by reverse-phase HPLC (Phenomenex C18,  $150 \times 21.2$  mm, 5 micron, preparative column, 8 ml/min) using an Agilent 1100 LC system by running a gradient from 0.1 % TFA in water to 0.1 % TFA in acetonitrile within 2-3 hours. Purity was assessed by analytical RP HPLC on an Agilent Zorbax C18 5 $\mu\text{m}$   $150 \times 4.3$  mm column.

### 1.2 Reaction of amino acids with $\text{NO}_3^\bullet$

#### 1.2.1 Reaction of phenylalanine 1a with $\text{NO}_2^\bullet/\text{N}_2\text{O}_4$

**1b**; 2-(*N*-Nitrosoacetamido)-3-phenyl-propionic acid methyl ester (*N*-nitroso-*N*-Ac-*O*-Me-phenyl alanine)

$^1\text{H}$ -NMR (500 MHz,  $\text{CDCl}_3$ ):  $\delta$  = 7.20 (m, 3 H, 2,4,6-*H*), 6.99 (dd,  $J$  = 7.1, 1.2 Hz, 2 H, 3,5-*H*), 5.55 (dd,  $J$  = 10.6, 5.6 Hz, 1 H, *CH*), 3.69 (s, 3 H,  $\text{COOCH}_3$ ), 3.42 (dd,  $J$  = 14.3, 5.6 Hz, 1 H, *CH}\_2*), 3.07 (dd,  $J$  = 14.3, 10.6 Hz, 1 H, *CH}\_2*), 2.60 ppm (s, 3 H,  $\text{N}(\text{NO})\text{COCH}_3$ ).

$^{13}\text{C}$ -NMR (125 MHz,  $\text{CDCl}_3$ ):  $\delta$  = 173.9 ( $\text{C}_\text{q}$ ,  $\text{NHCOCH}_3$ ), 167.9 ( $\text{C}_\text{q}$ ,  $\text{COOCH}_3$ ), 136.1 ( $\text{C}_\text{q}$ , *C*-1), 129.0 ( $\text{C}_\text{t}$ , *C*-3,5), 128.7 ( $\text{C}_\text{t}$ , *C*-2,6), 127.2 ( $\text{C}_\text{t}$ , *C*-4), 52.9 ( $\text{C}_\text{p}$ ,  $\text{COOCH}_3$ ), 52.6 ( $\text{C}_\text{t}$ , *CH*), 33.8 ( $\text{C}_\text{s}$ ,  $\text{CH}_2$ ), 22.5 ppm ( $\text{C}_\text{p}$ ,  $\text{N}(\text{NO})\text{COCH}_3$ ).

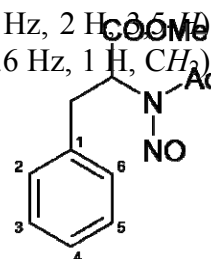

IR (neat):  $\nu$  = 3030, 2955, 1734, 1520, 1498, 1456, 1436, 1374, 1351, 1305, 1280, 1231, 1179, 1117, 1087, 1069, 1047, 931, 810, 767, 749, 700, 671, 655  $\text{cm}^{-1}$ .

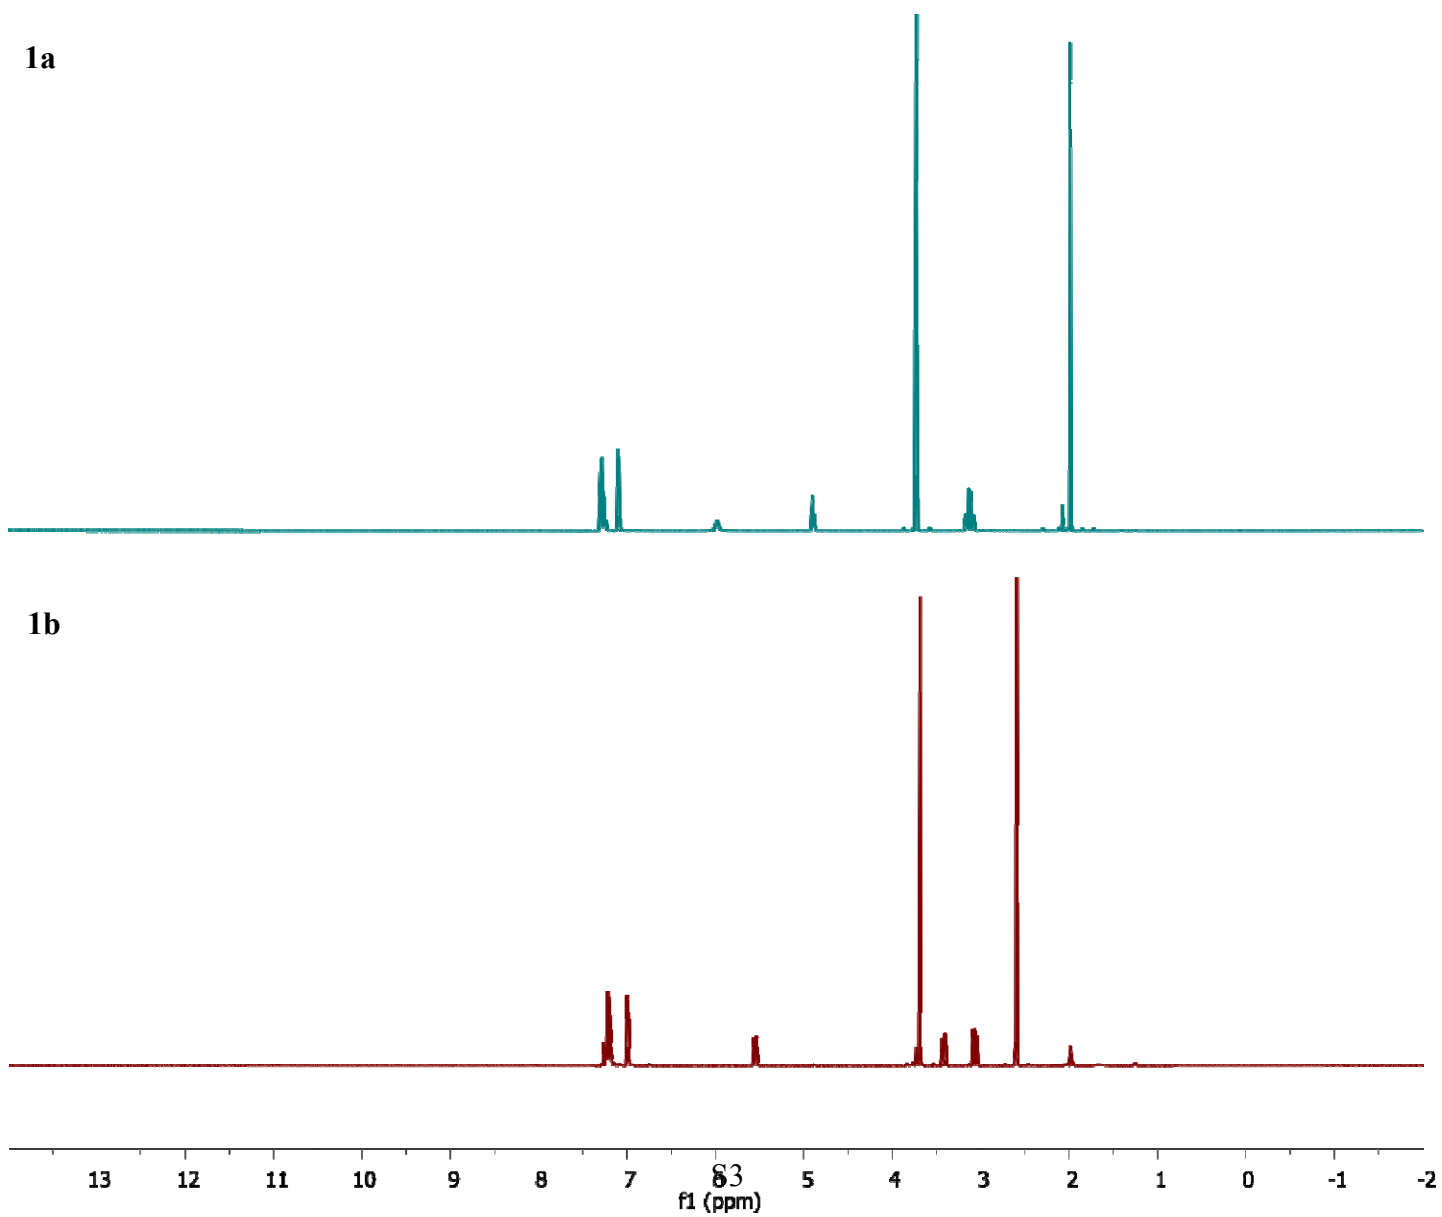

$^{13}\text{C}$  NMR

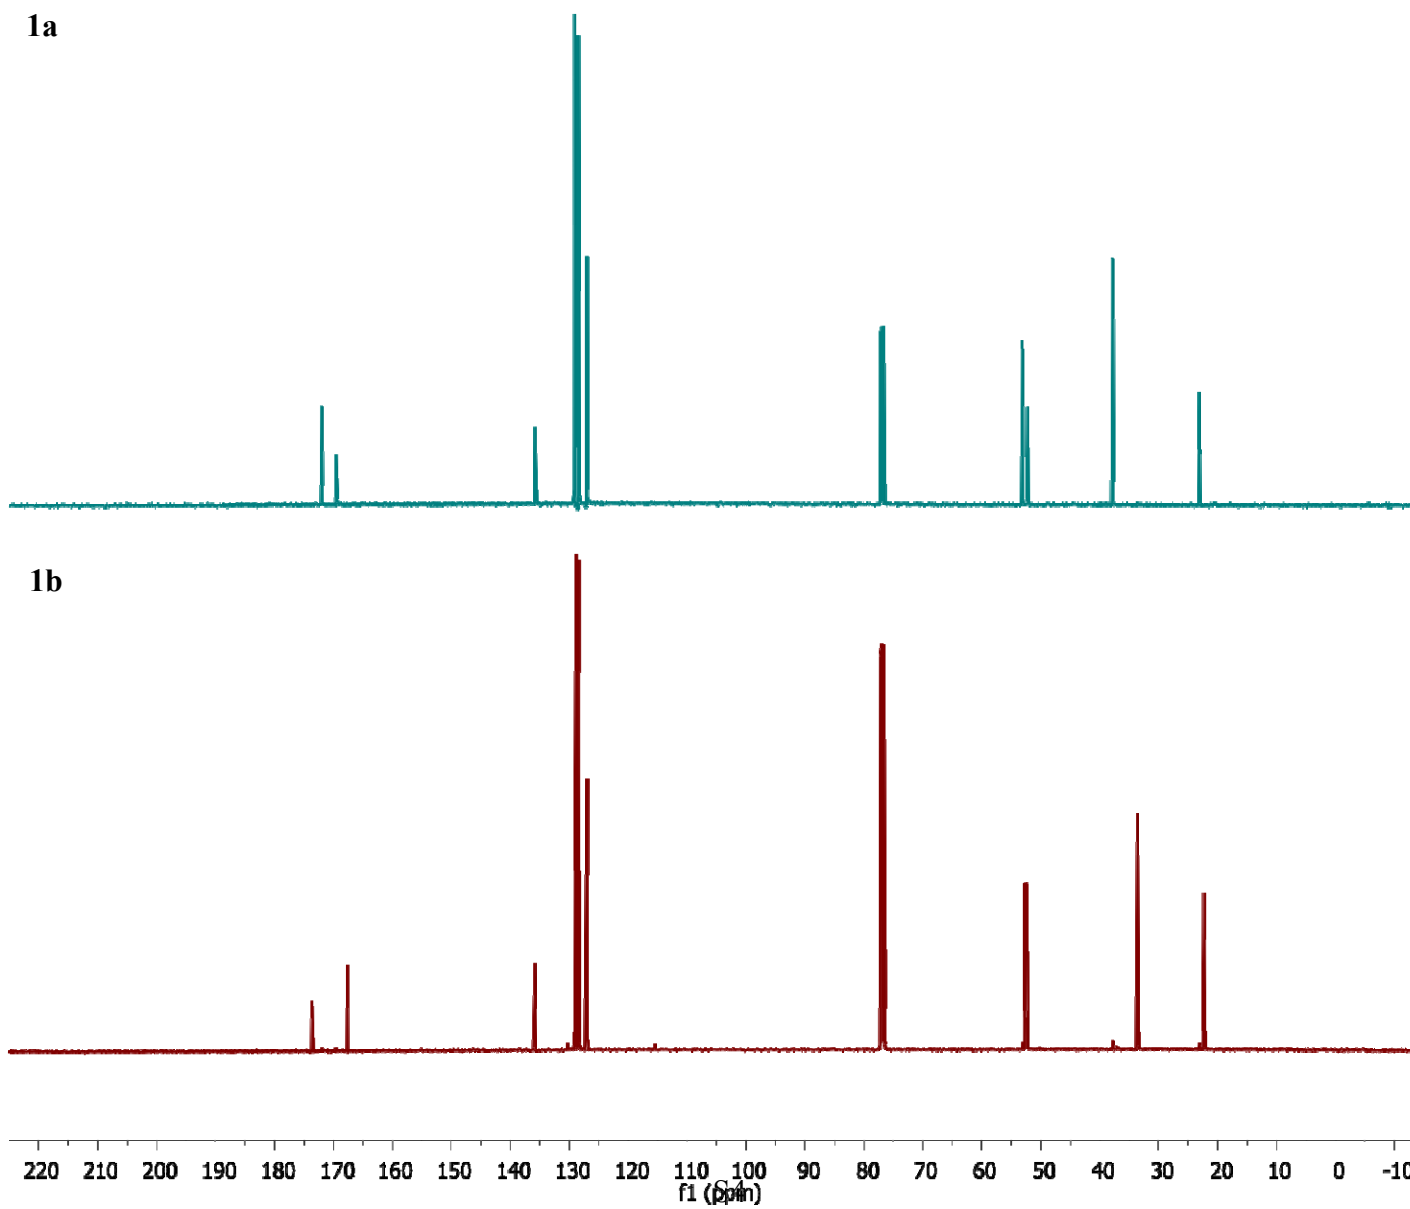

IR

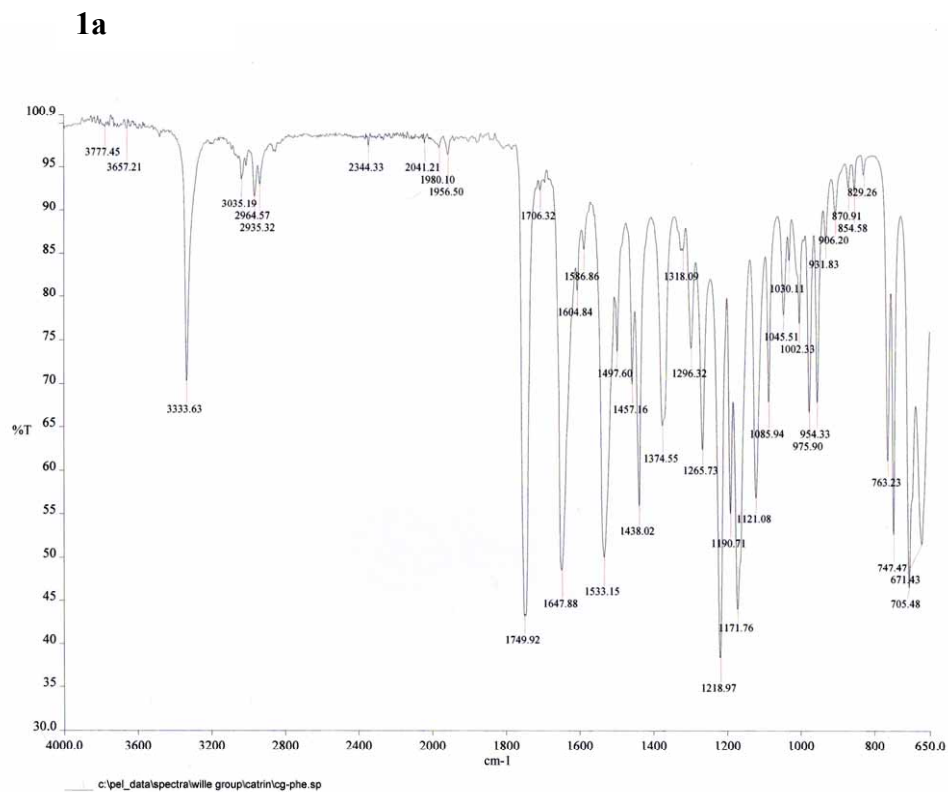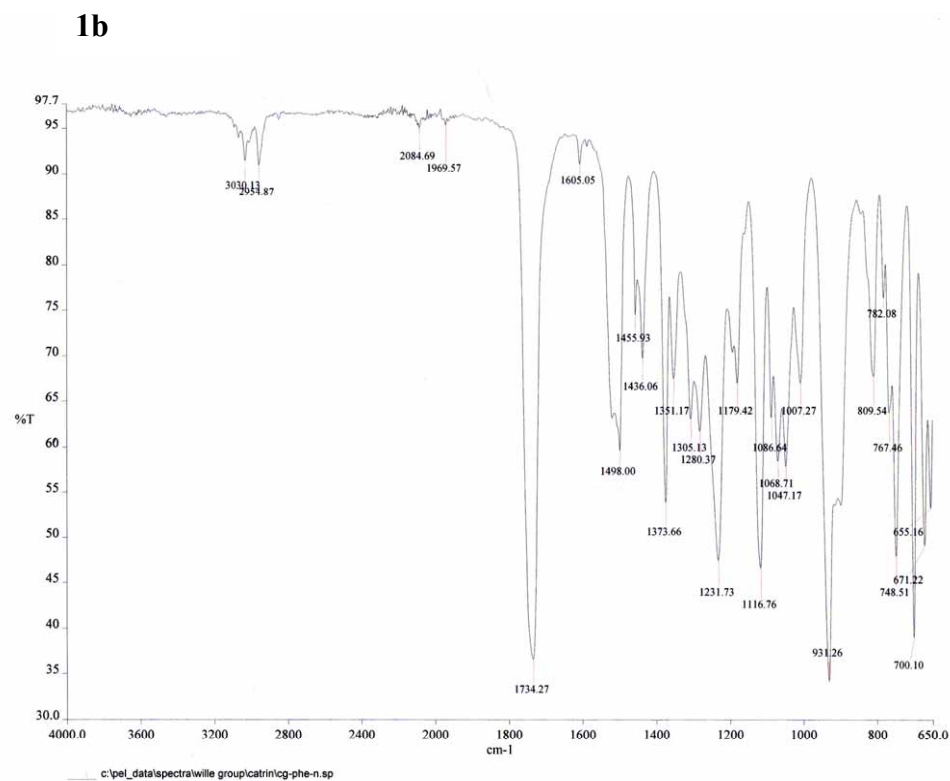

### 1.2.2 Reaction of phenylalanine 1a with NO<sub>3</sub><sup>•</sup>

**ortho-6a**; 2-Acetylamino-3-(2-nitro-phenyl)-propionic acid methyl ester (*ortho*-nitro-*N*-Ac-*O*-Methyl alanine)

<sup>1</sup>H-NMR (500 MHz, CDCl<sub>3</sub>):  $\delta$  = 7.92 (dd,  $J$  = 8.2, 1.3 Hz, 1 H, 3-*H*), 7.57 (td,  $J$  = 7.6, 1.3 Hz, 1 H, 5-*H*), 7.43 (ddd,  $J$  = 8.2, 7.6, 1.3 Hz, 1 H, 4-*H*), 7.39 (dd,  $J$  = 7.6, 1.3 Hz, 1 H, 6-*H*), 6.43 (d,  $J$  = 7.5 Hz, 1 H, NH), 4.93 (td,  $J$  = 8.1, 5.9 Hz, 1 H, CH), 3.74 (s, 3 H, COOCH<sub>3</sub>), 3.51 (dd,  $J$  = 13.8, 5.9 Hz, 1 H, CH<sub>2</sub>), 3.33 (dd,  $J$  = 13.8, 8.2 Hz, 1 H, CH<sub>2</sub>), 1.99 ppm (s, 3 H, NHCOCH<sub>3</sub>).

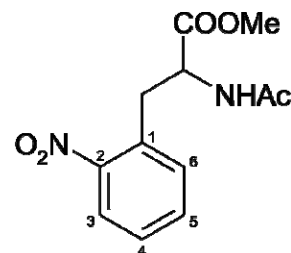

<sup>13</sup>C-NMR (125 MHz, CDCl<sub>3</sub>):  $\delta$  = 171.5 (C<sub>q</sub>, COOCH<sub>3</sub>), 171.4 (C<sub>q</sub>, NHCOCH<sub>3</sub>), 149.9 (C<sub>q</sub>, C-2), 133.4 (C<sub>t</sub>, C-5), 132.8 (C<sub>t</sub>, C-6), 131.3 (C<sub>q</sub>, C-1), 128.6 (C<sub>t</sub>, C-4), 125.1 (C<sub>t</sub>, C-3), 53.4 (C<sub>t</sub>, CH), 53.0 (C<sub>p</sub>, COOCH<sub>3</sub>), 34.8 (C<sub>s</sub>, CH<sub>2</sub>), 22.9 ppm (C<sub>p</sub>, NHCOCH<sub>3</sub>).

MS (EI, 70 eV):  $m/z$  (%) = 266.0 [M<sup>+</sup>], 220.1 [M<sup>+</sup> - NO<sub>2</sub>], 207.1 [M<sup>+</sup> - COOMe].

HR-MS: C<sub>12</sub>H<sub>14</sub>N<sub>2</sub>O<sub>5</sub>+H: calcd 267.0981, found 267.0981.  
C<sub>11</sub><sup>13</sup>CH<sub>14</sub>N<sub>2</sub>O<sub>5</sub>+H: calcd 268.1015, found 268.1010.

**meta-6a**; 2-Acetylamino-3-(3-nitro-phenyl)-propionic acid methyl ester (*meta*-nitro-*N*-Ac-*O*-Methyl alanine)

<sup>1</sup>H-NMR (500 MHz, CDCl<sub>3</sub>):  $\delta$  = 8.78 (d,  $J$  = 2.3 Hz, 1 H, 3-*H*), 8.40 (dd,  $J$  = 8.5, 2.3 Hz, 1 H, 4-*H*), 7.68 (d,  $J$  = 8.5 Hz, 1 H, 6-*H*), 7.26 (d,  $J$  = 2.3 Hz, 1 H, 5-*H*), 6.16 (d,  $J$  = 7.6 Hz, 1 H, NH), 4.93 (dd,  $J$  = 14.0, 7.6 Hz, 1 H, CH), 3.76 (s, 3 H, COOCH<sub>3</sub>), 3.68 (d,  $J$  = 13.7, 6.2 Hz, 1 H, CH<sub>2</sub>), 3.39 (dd,  $J$  = 13.7, 7.8 Hz, 1 H, CH<sub>2</sub>), 1.95 ppm (s, 3 H, NHCOCH<sub>3</sub>).

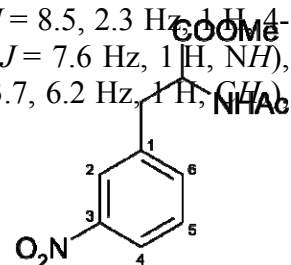

MS (EI, 70 eV):  $m/z$  (%) = 266.0 [M<sup>+</sup>], 207.1 [M<sup>+</sup> - COOMe], 165.1 [M<sup>+</sup> - COOMe - Ac].

**para-6a**; 2-Acetylamino-3-(4-nitro-phenyl)-propionic acid methyl ester (*para*-nitro-*N*-Ac-*O*-Methyl alanine)

<sup>1</sup>H-NMR (500 MHz, CDCl<sub>3</sub>):  $\delta$  = 8.78 (d,  $J$  = 8.8 Hz, 2 H, 3,5-*H*), 7.28 (d,  $J$  = 8.8 Hz, 2 H, 2,6-*H*), 6.19 (d,  $J$  = 7.0 Hz, 1 H, NH), 4.93 (dt,  $J$  = 7.4, 5.9 Hz, 1 H, CH), 3.76 (s, 3 H, COOCH<sub>3</sub>), 3.31 (dd,  $J$  = 13.8, 6.2 Hz, 1 H, CH<sub>2</sub>), 3.20 (dd,  $J$  = 13.8, 5.6 Hz, 1 H, CH<sub>2</sub>), 2.06 ppm (s, 3 H, NHCOCH<sub>3</sub>).

<sup>13</sup>C-NMR (125 MHz, CDCl<sub>3</sub>):  $\delta$  = 171.4 (C<sub>q</sub>, COOCH<sub>3</sub>), 171.2 (C<sub>q</sub>, NHCOCH<sub>3</sub>), 147.4 (C<sub>q</sub>, C-4), 143.6 (C<sub>q</sub>, C-1), 130.3 (C<sub>t</sub>, C-2,6), 123.9 (C<sub>t</sub>, C-3,5), 53.3 (C<sub>t</sub>, CH), 52.9 (C<sub>p</sub>, COOCH<sub>3</sub>), 37.8 (C<sub>s</sub>, CH<sub>2</sub>), 23.0 ppm (C<sub>p</sub>, NHCOCH<sub>3</sub>).

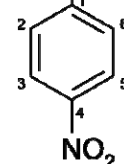

MS (EI, 70 eV):  $m/z$  (%) = 266.1 [M<sup>+</sup>], 207.0 [M<sup>+</sup> - COOMe], 165.0 [M<sup>+</sup> - COOMe - Ac].

HR-MS: C<sub>12</sub>H<sub>14</sub>N<sub>2</sub>O<sub>5</sub>+H: calcd 267.0981, found 267.0985.  
C<sub>11</sub><sup>13</sup>CH<sub>14</sub>N<sub>2</sub>O<sub>5</sub>+H: calcd 268.1015, found 268.1009.

**ortho-6b**; 2-(*N*-Nitrosoacetamido)-3-(2-nitro-phenyl)-propionic acid methyl ester (2-nitro-*N*-nitroso-*N*-Ac-*O*-Me-phenyl alanine)

$^1\text{H-NMR}$  (500 MHz,  $\text{CDCl}_3$ ):  $\delta$  = 8.01 (dd,  $J$  = 8.2, 1.4 Hz, 1 H, 3-*H*), 7.48 (td,  $J$  = 7.5, 1.4 Hz, 1 H, 5-*H*), 7.40 (ddd,  $J$  = 8.1, 7.5, 1.5 Hz, 1 H, 4-*H*), 7.04 (dd,  $J$  = 7.7, 1.2 Hz, 1 H, 6-*H*), 5.79 (dd,  $J$  = 10.4, 4.7 Hz, 1 H, *CH*), 3.94 (dd,  $J$  = 14.0, 4.7 Hz, 1 H,  $\text{CH}_2$ ), 3.71 (s, 3 H,  $\text{COOCH}_3$ ), 3.17 (dd,  $J$  = 14.1, 10.4 Hz, 1 H,  $\text{CH}_2$ ), 2.65 ppm (s, 3 H,  $\text{N}(\text{NO})\text{COCH}_3$ ).

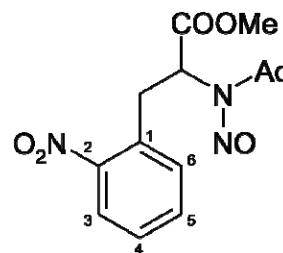

**para-6b**; 2-(*N*-Nitrosoacetamido)-3-(4-nitro-phenyl)-propionic acid methyl ester (4-nitro-*N*-nitroso-*N*-Ac-*O*-Me-phenyl alanine)

$^1\text{H-NMR}$  (500 MHz,  $\text{CDCl}_3$ ):  $\delta$  = 8.11 (d,  $J$  = 8.8 Hz, 2 H, 3,5-*H*), 7.22 (d,  $J$  = 8.8 Hz, 2 H, 2,6-*H*), 5.56 (dd,  $J$  = 9.9, 6.0 Hz, 1 H, *CH*), 3.70 (s, 3 H,  $\text{COOCH}_3$ ), 3.54 (dd,  $J$  = 14.3, 6.0 Hz, 2 H,  $\text{CH}_2$ ), 3.14 (dd,  $J$  = 14.3, 9.8 Hz, 2 H,  $\text{CH}_2$ ), 2.67 ppm (s, 3 H,  $\text{N}(\text{NO})\text{COCH}_3$ ).

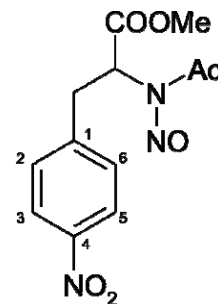

***ortho-6a***

<sup>1</sup>H NMR:

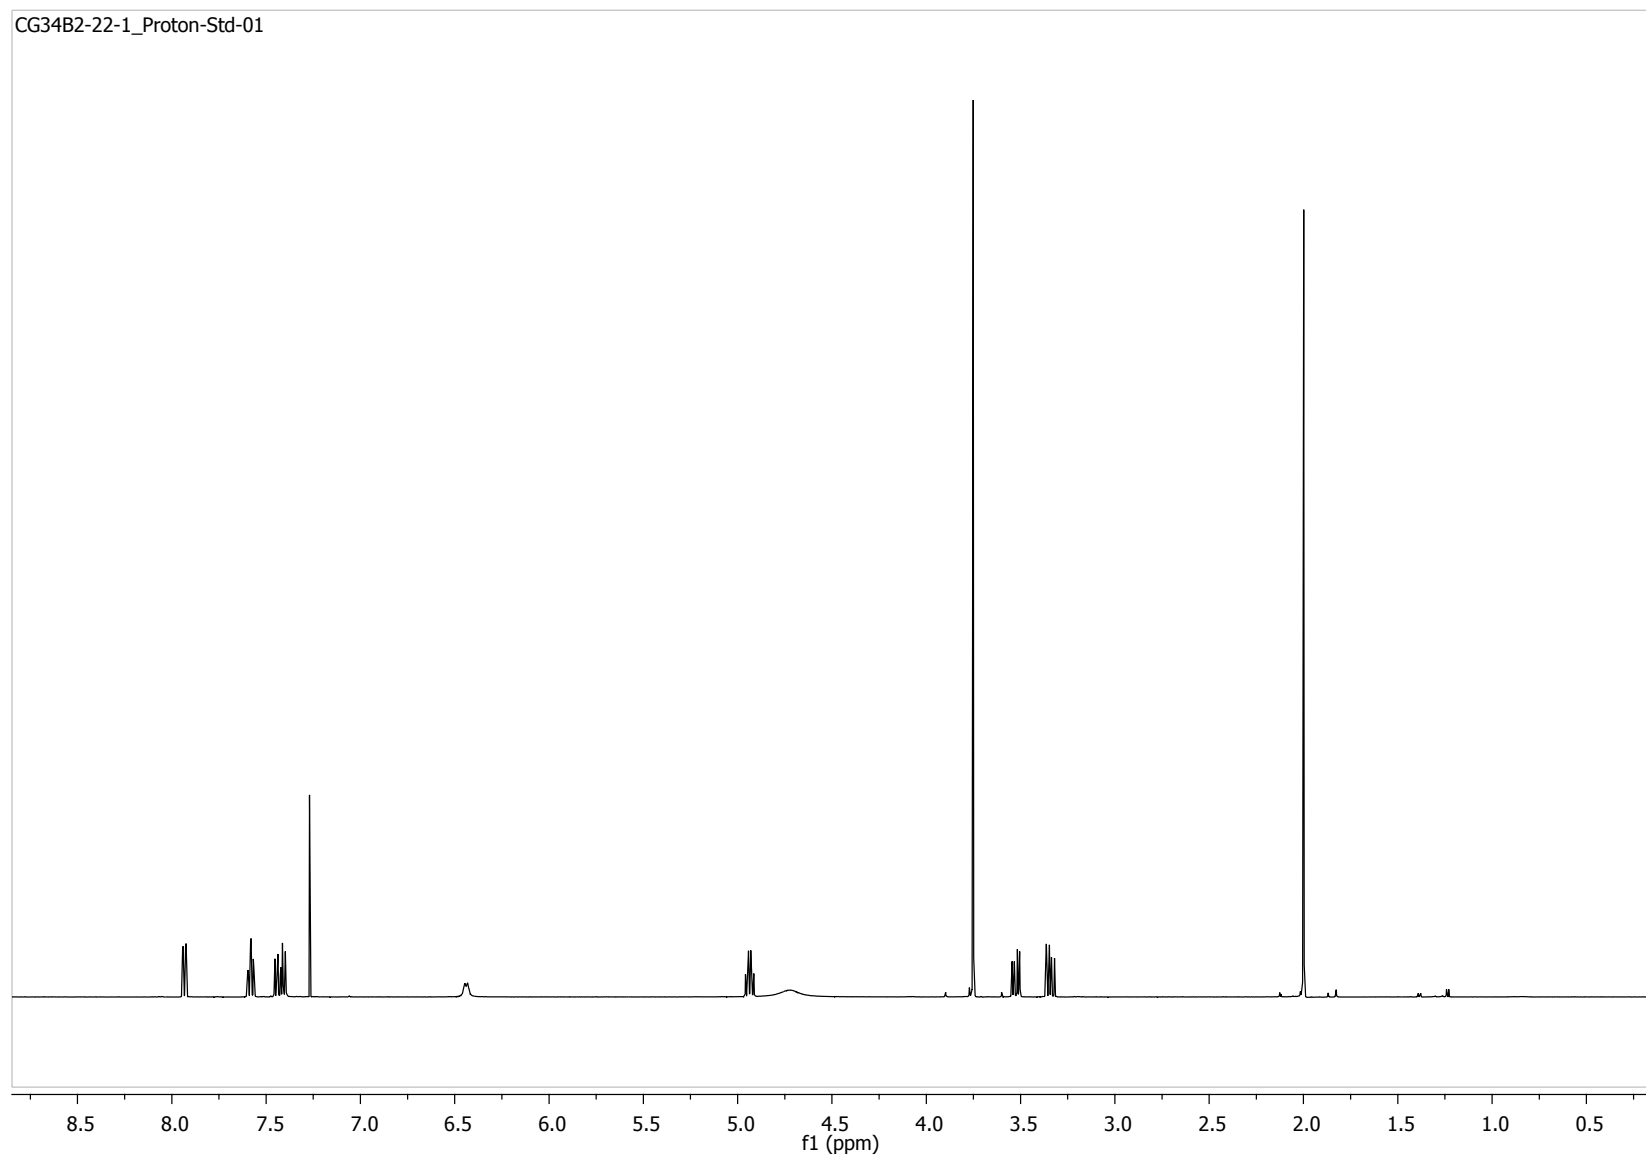



***ortho-6a***

$^{13}\text{C}$  NMR:

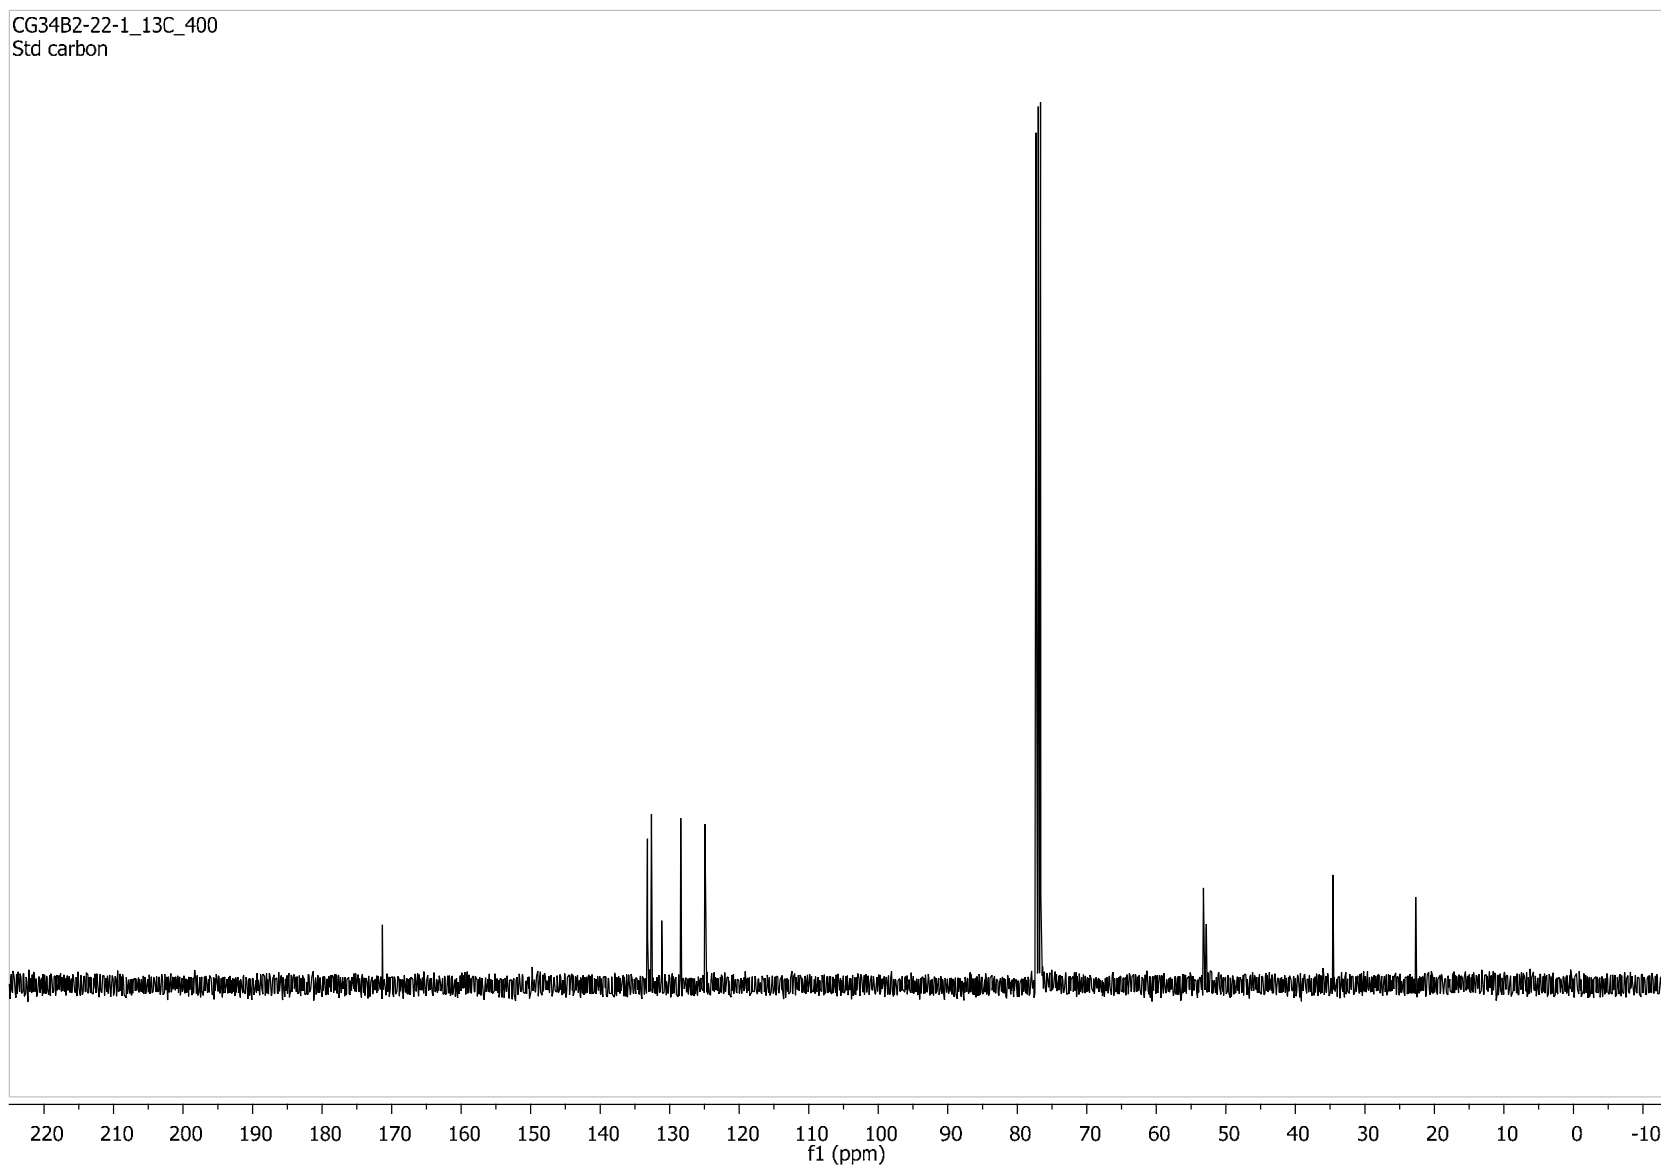

***ortho-6a***

**HPLC:**

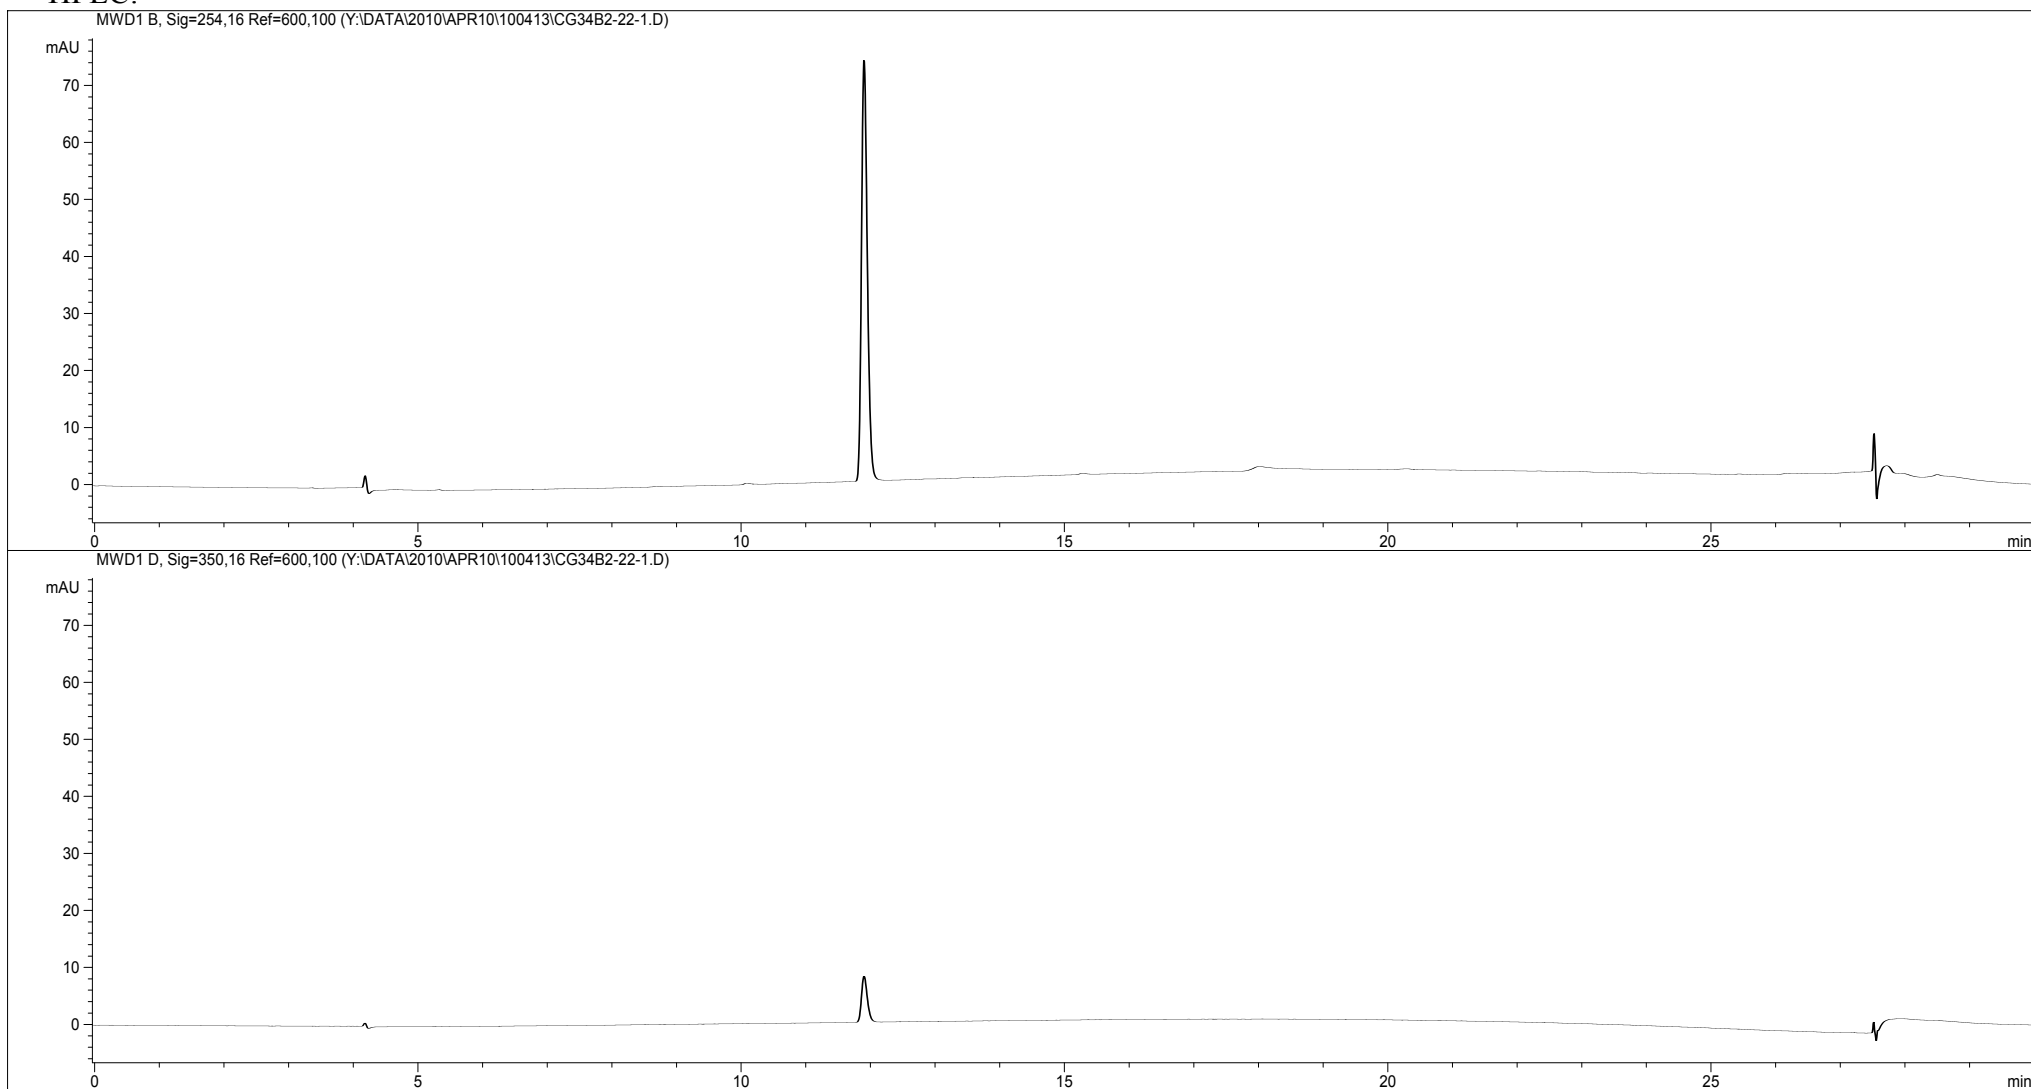

***meta-6a***

<sup>1</sup>H NMR:

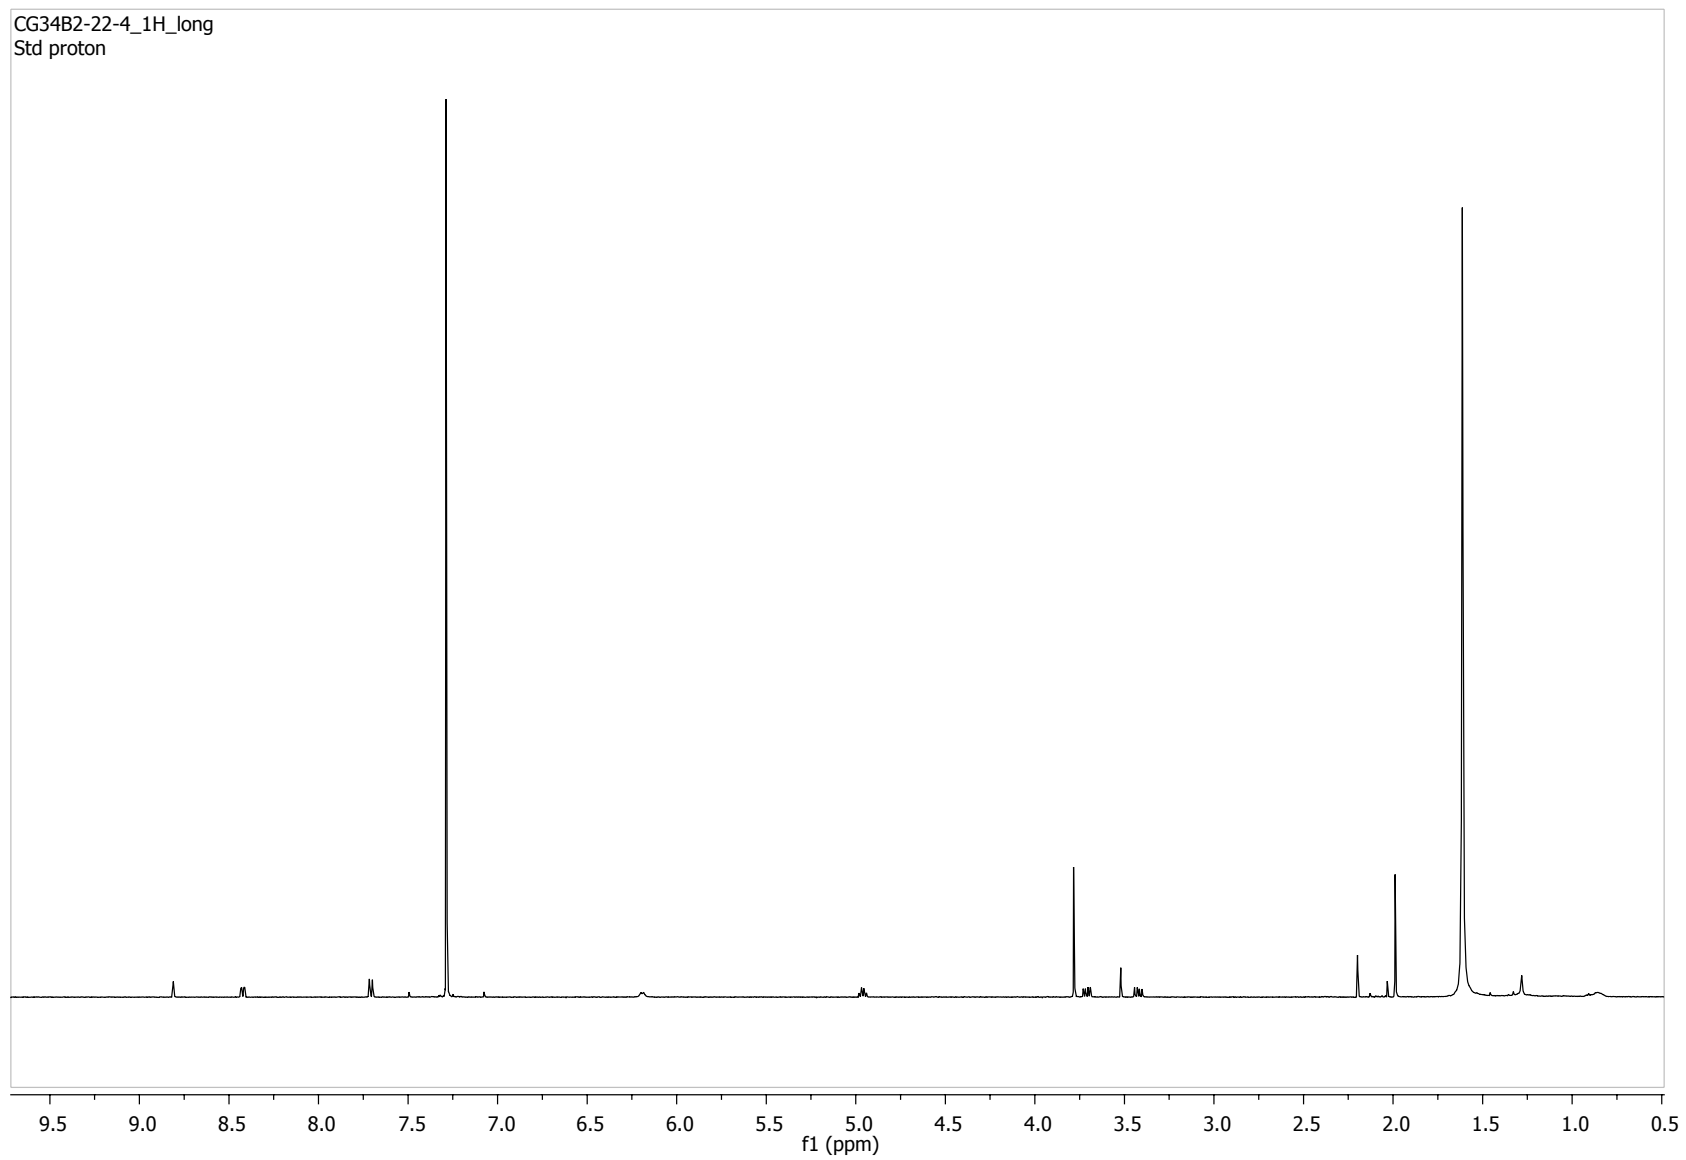

***meta-6a***

HPLC:

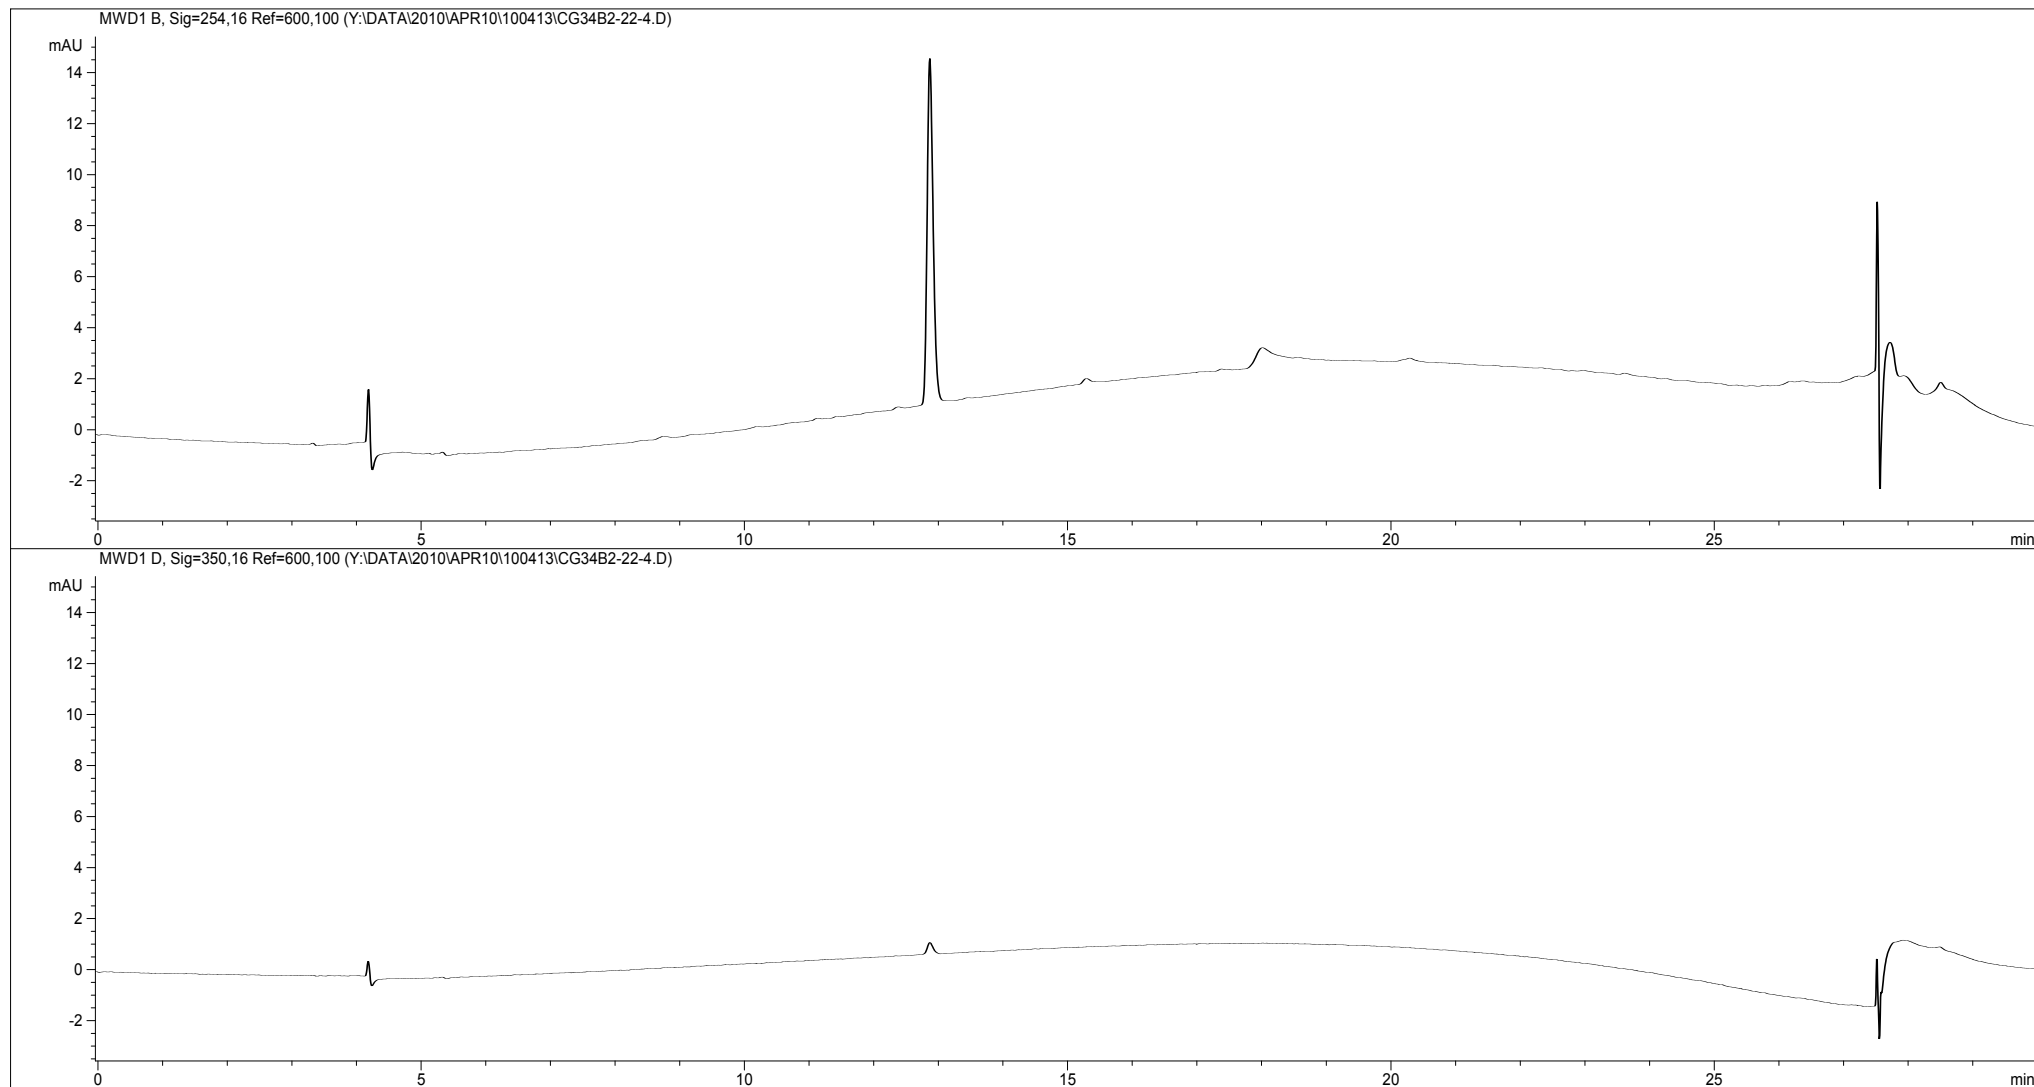

Supplementary Material (ESI) for Organic & Biomolecular Chemistry  
This journal is (c) The Royal Society of Chemistry 2011

***para-6a***  
<sup>1</sup>H NMR:

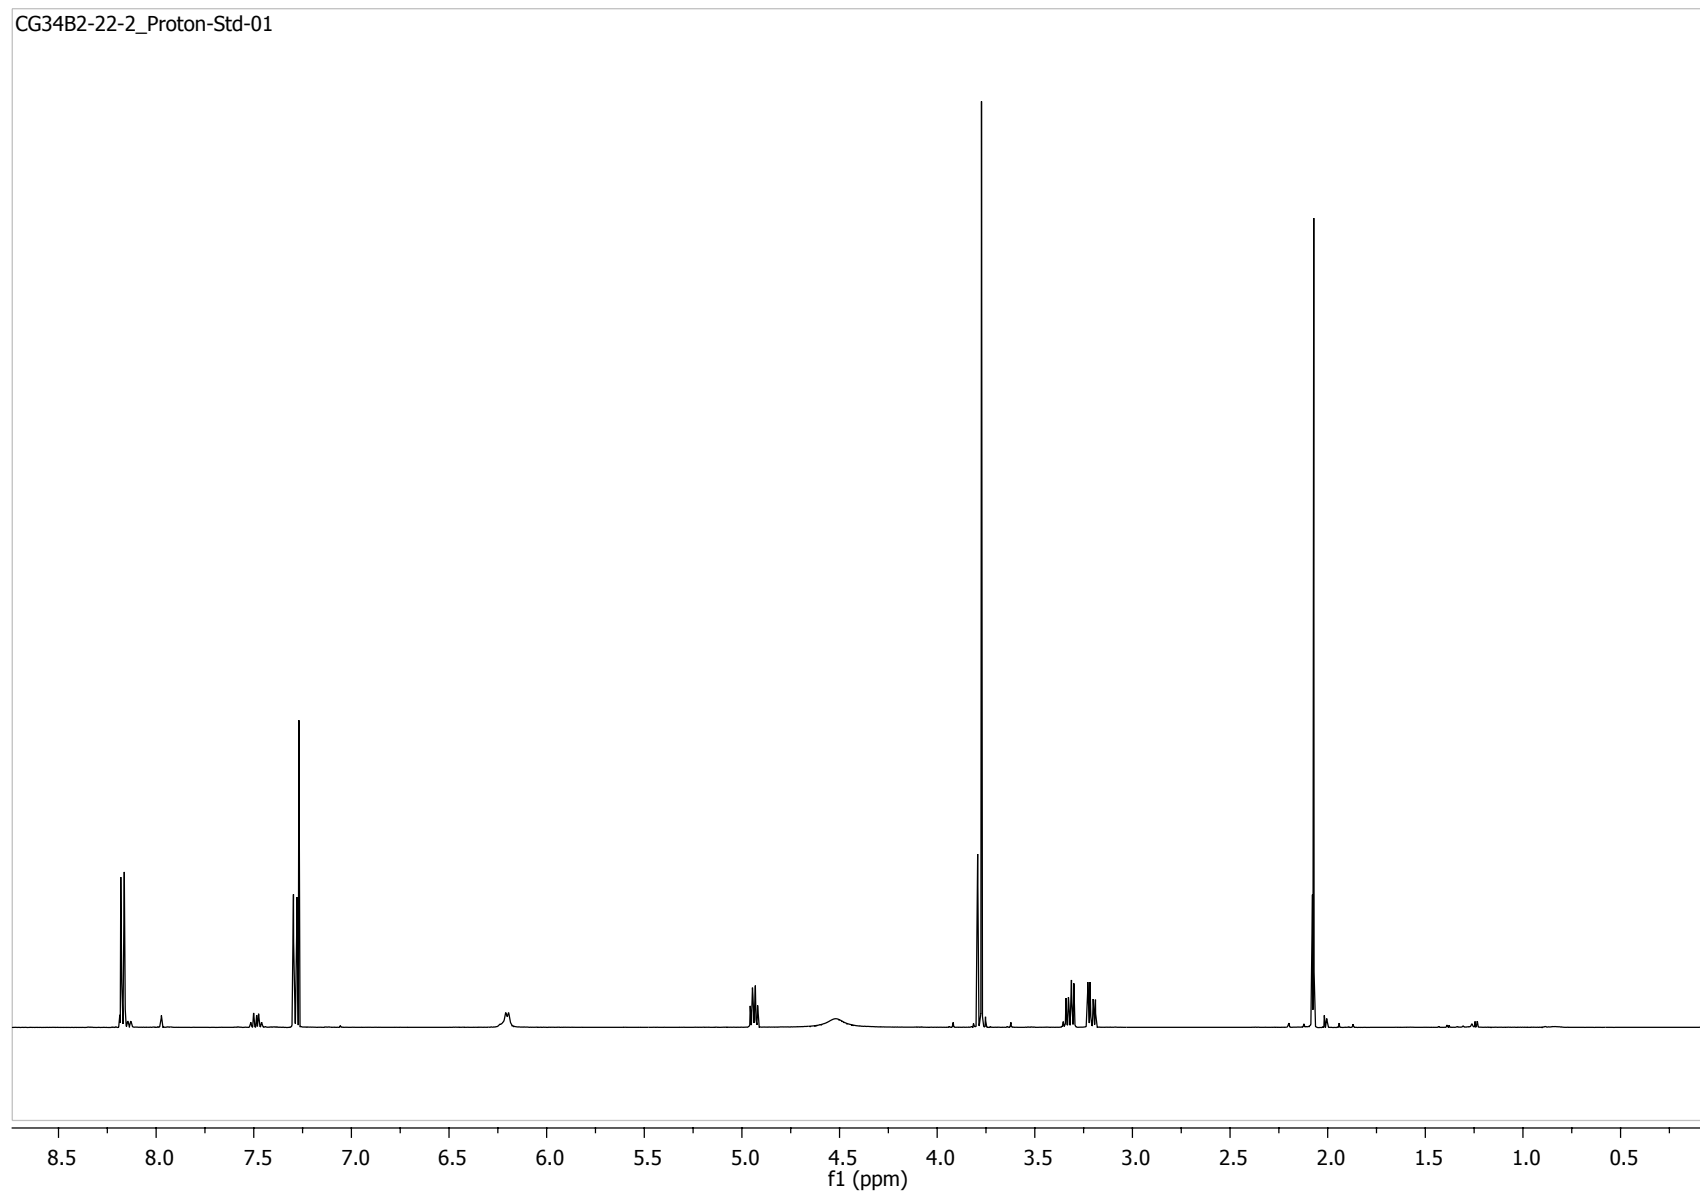

Supplementary Material (ESI) for Organic & Biomolecular Chemistry  
This journal is (c) The Royal Society of Chemistry 2011

***para-6a***  
<sup>13</sup>C NMR:

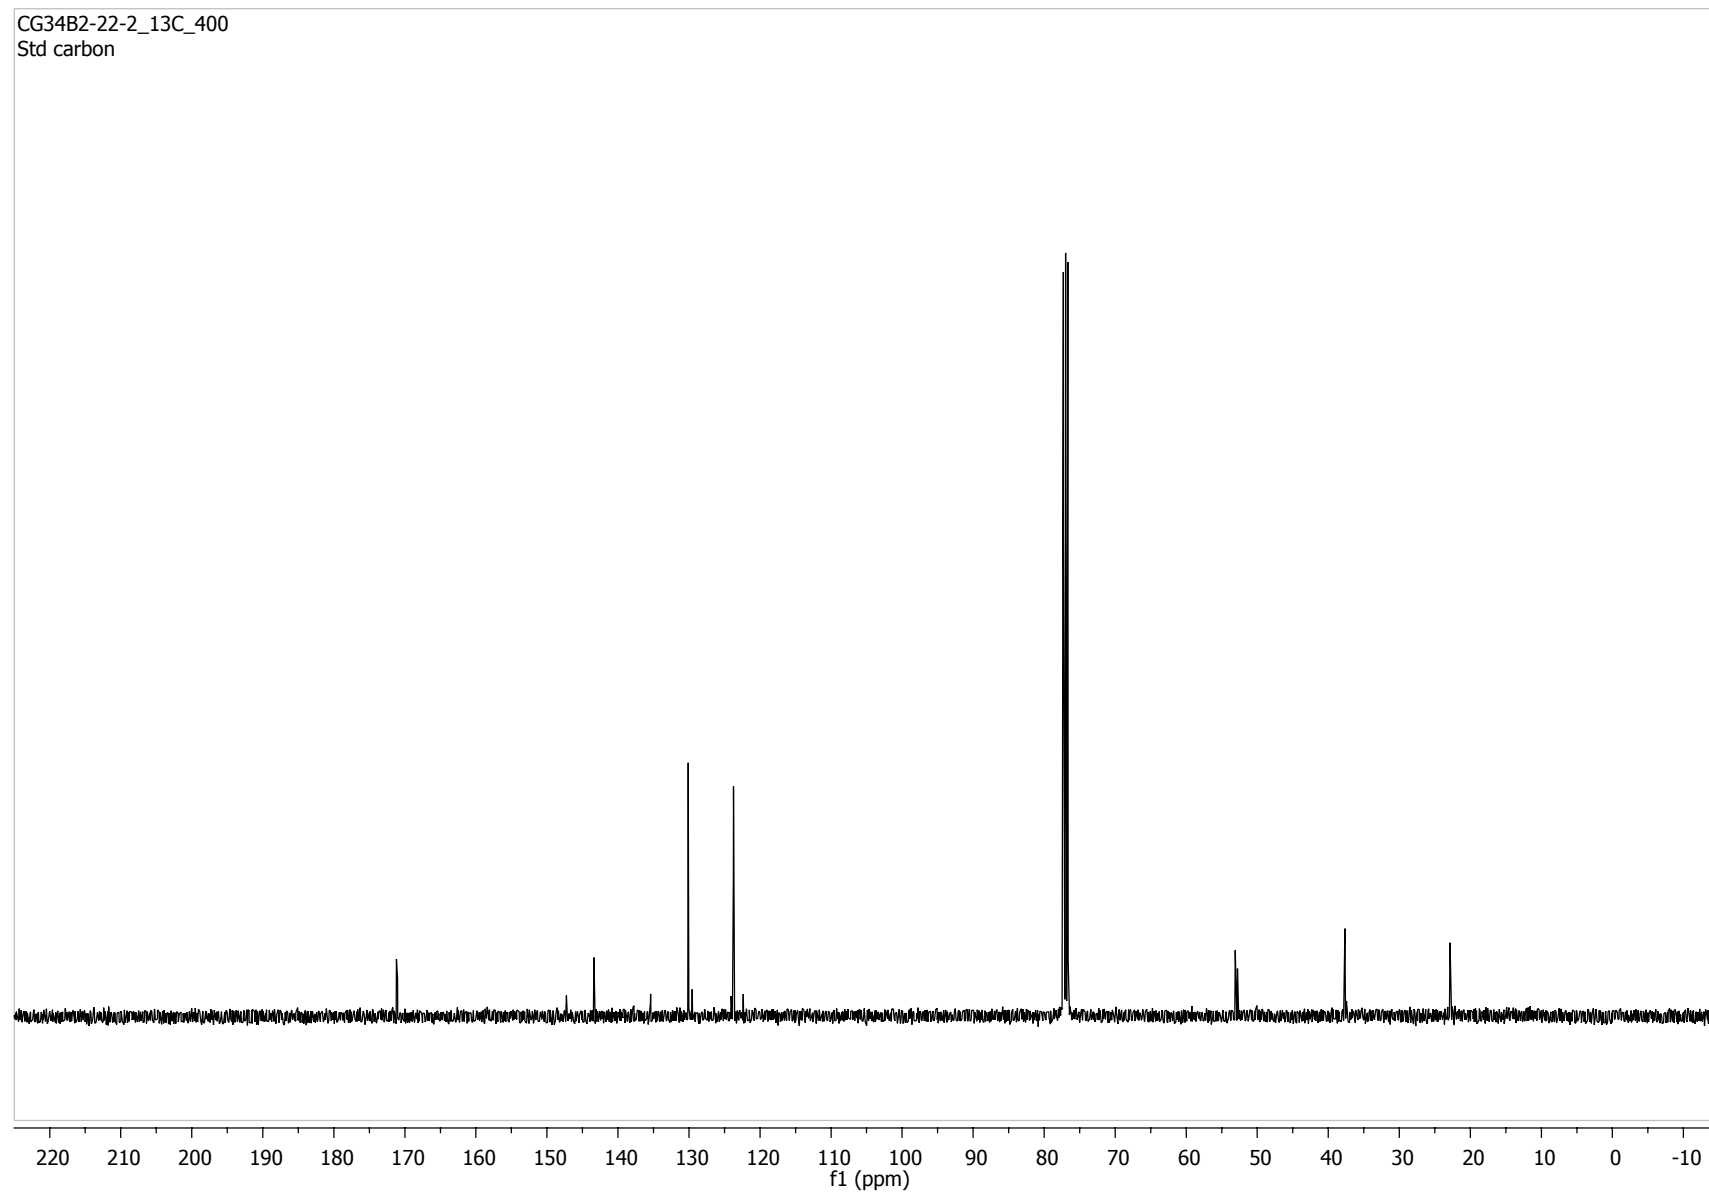



***para-6a***

**HPLC:**

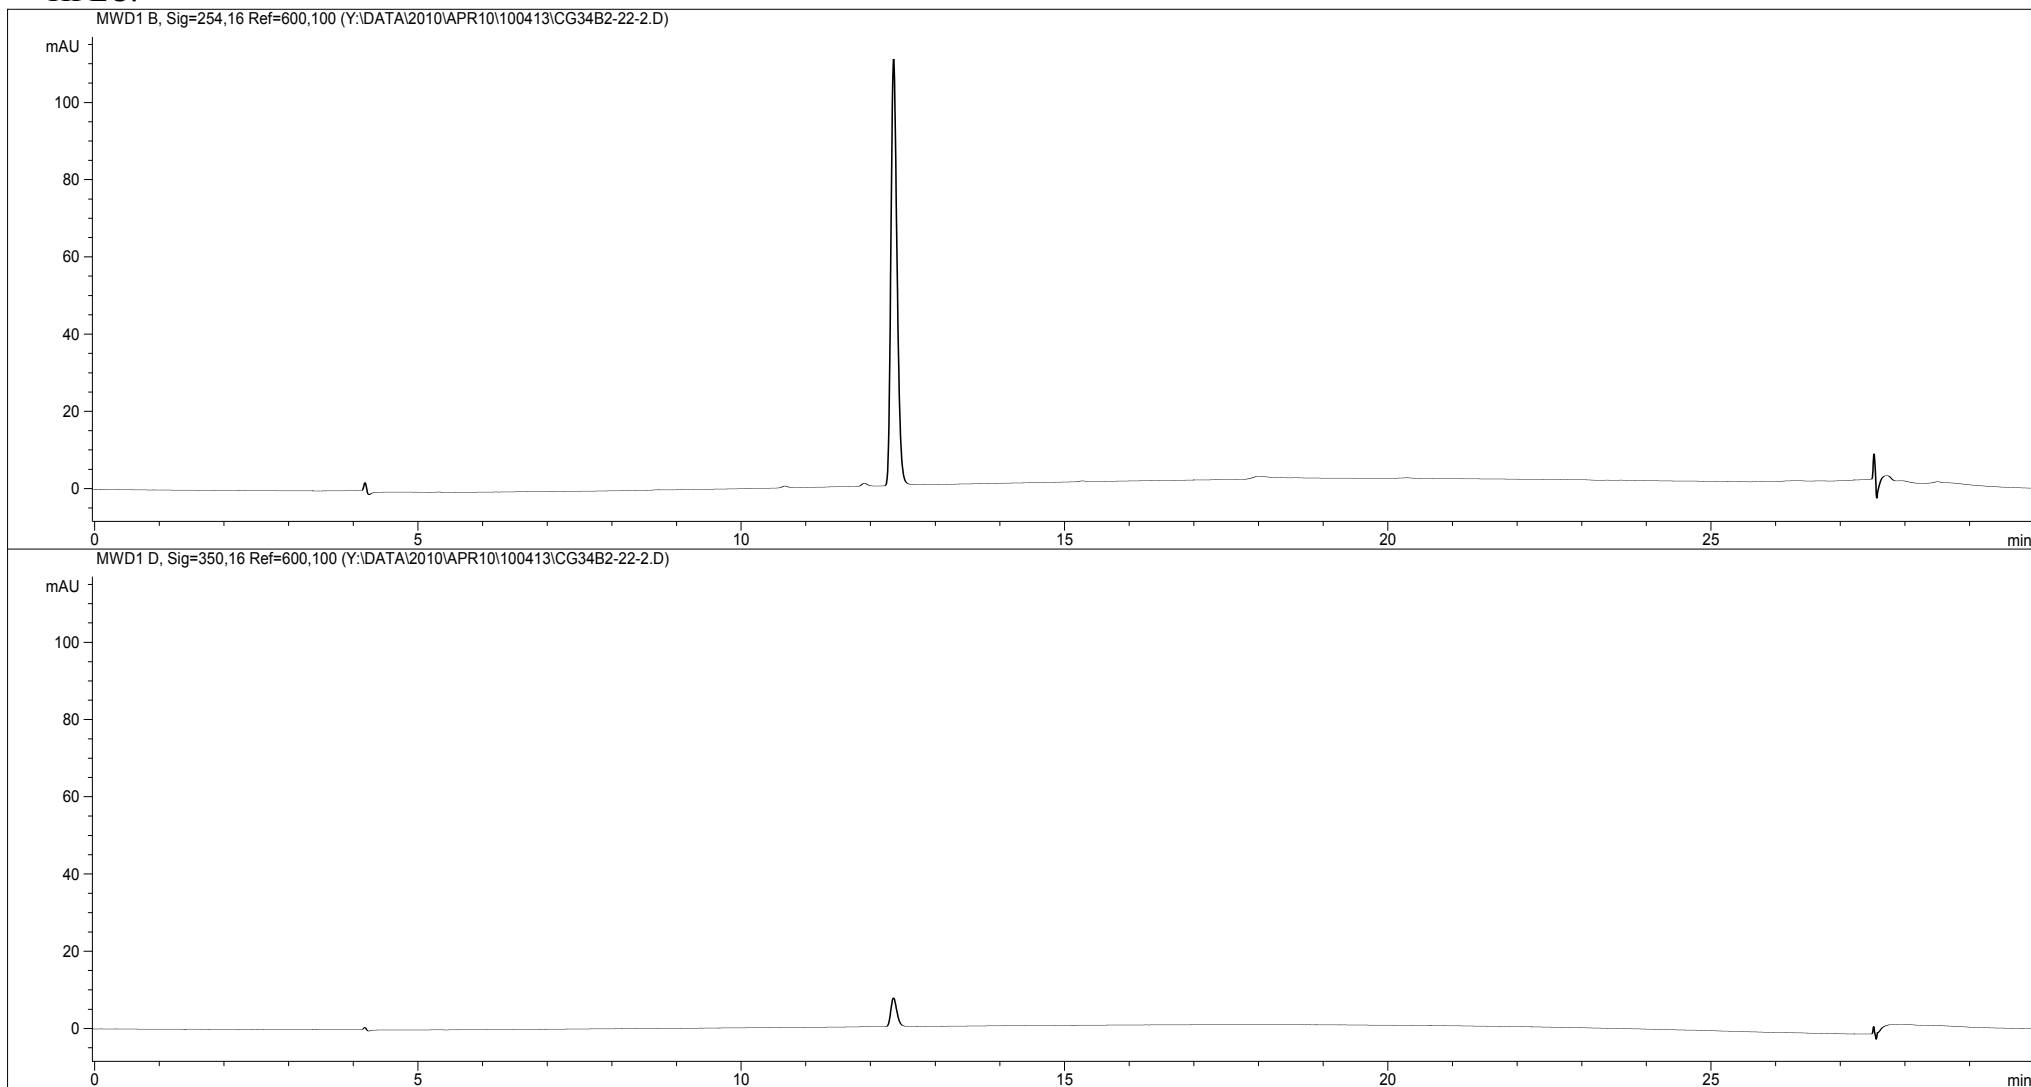

Supplementary Material (ESI) for Organic & Biomolecular Chemistry  
This journal is (c) The Royal Society of Chemistry 2011

***ortho-6b***  
<sup>1</sup>H NMR:

CG-Phe-3\_Proton-Std-01

pad=10 run with findz0 before acquisition

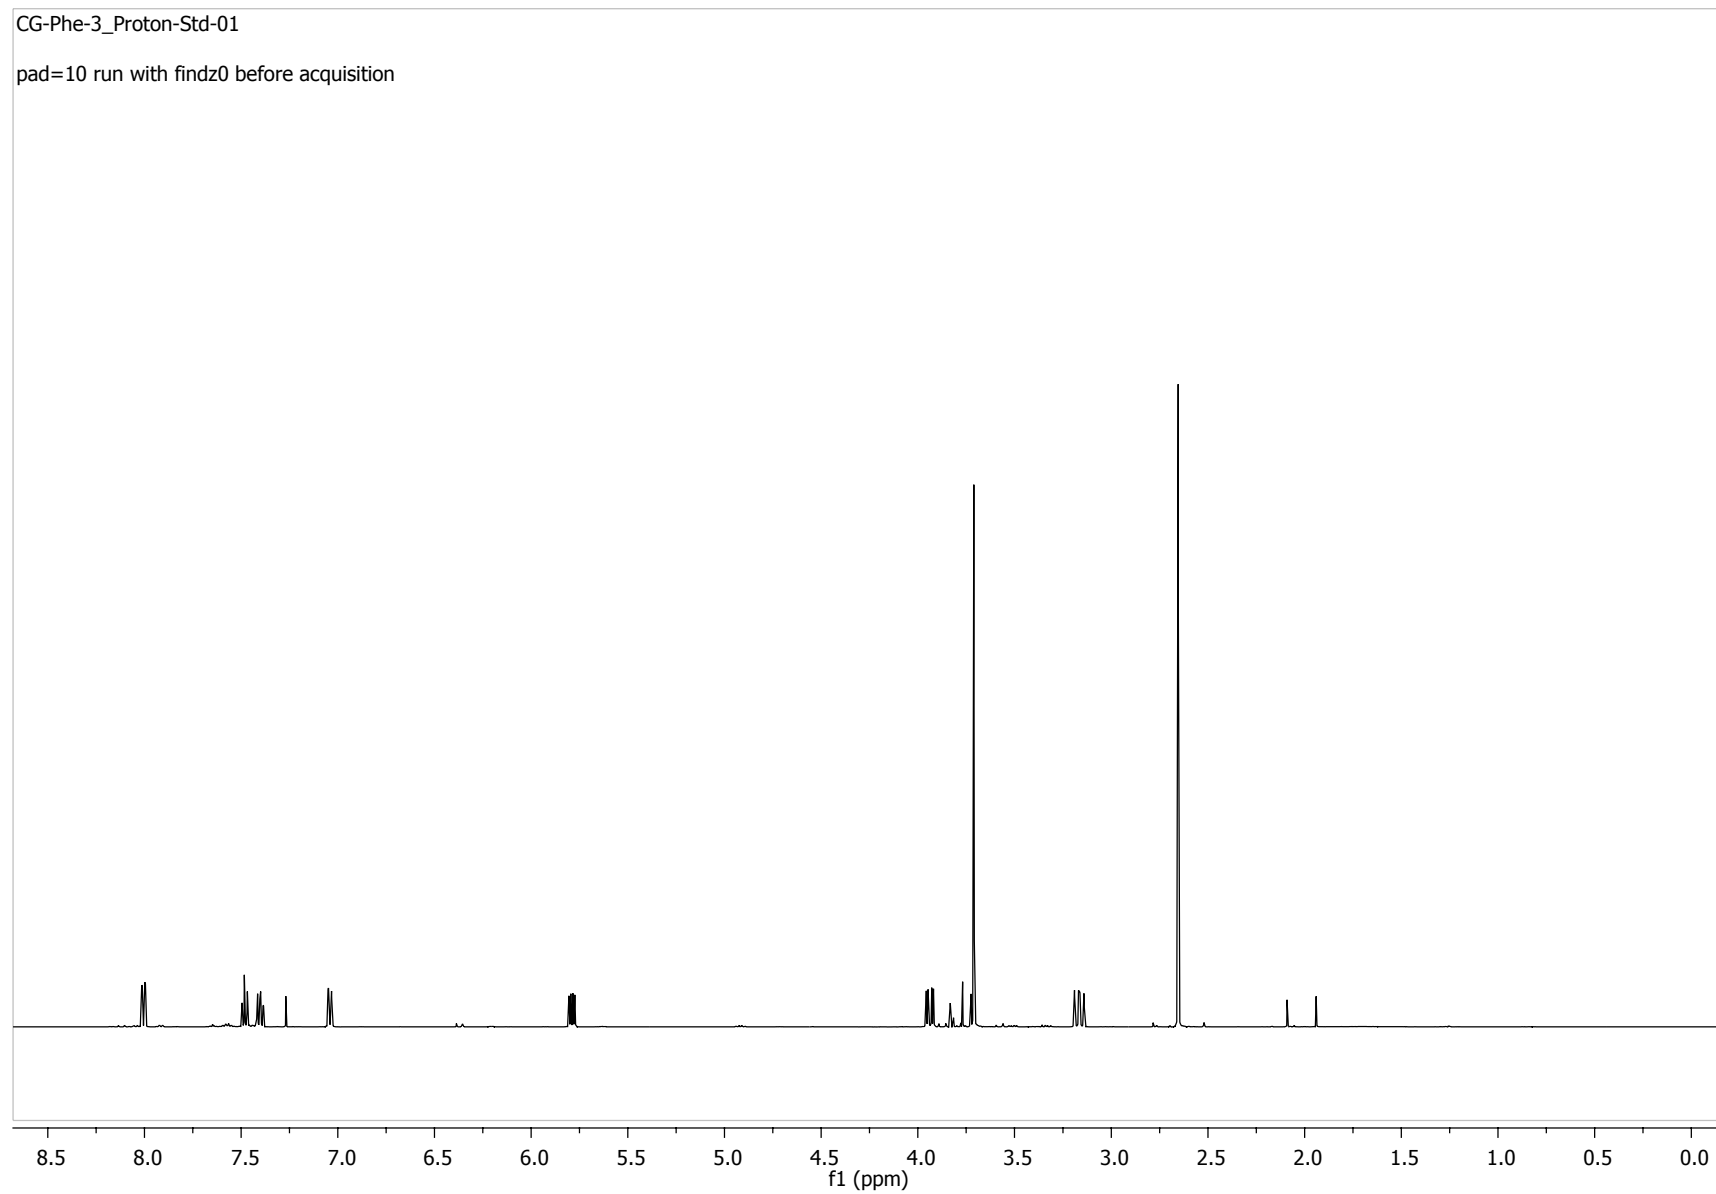

*para-6b*

$^1\text{H}$  NMR:

CG-Phe-4\_Proton-Std-01

pad=10 run with findz0 before acquisition

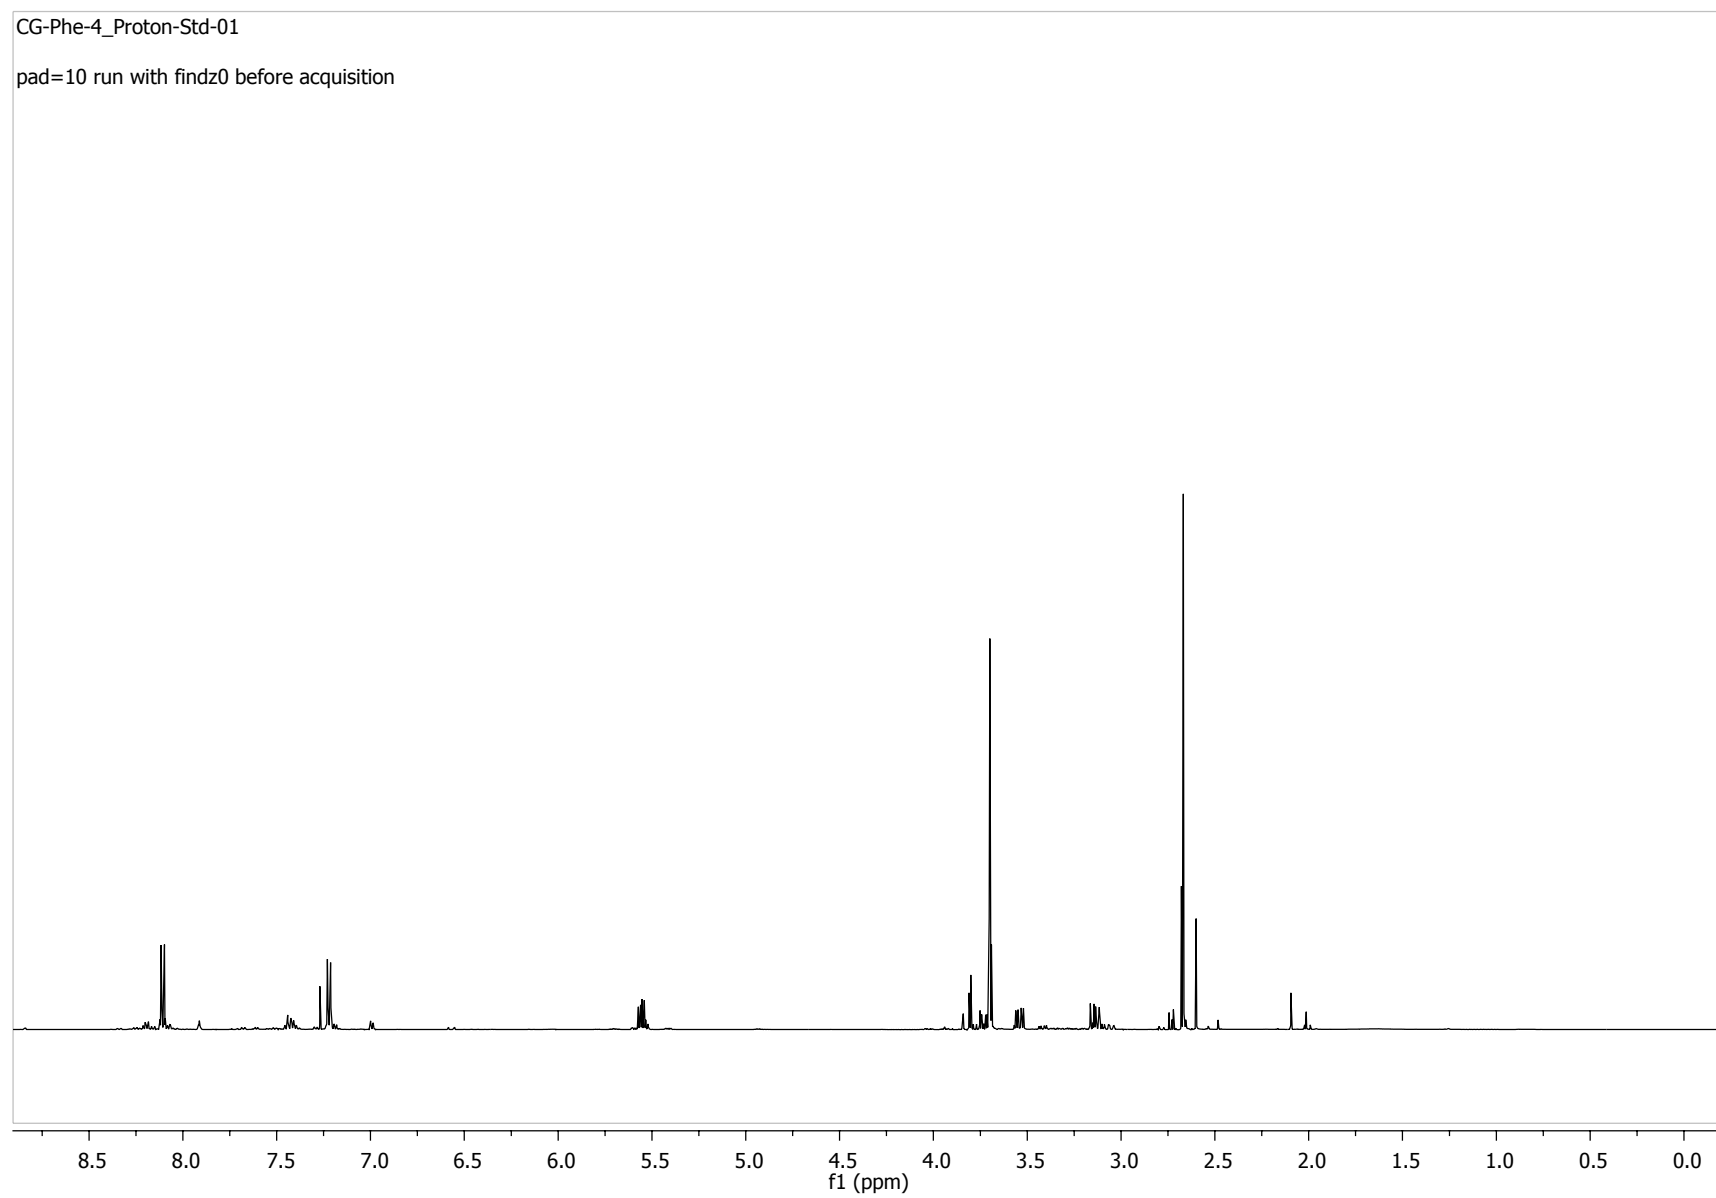

### 1.2.3 Reaction of tyrosine 2a with NO<sub>3</sub><sup>•</sup>

**4a**; 2-Acetylamino-3-(4-hydroxy-3-nitro-phenyl)-propionic acid methyl ester (3-nitro-*N*-Ac-*O*-Me-tyrosine)

<sup>1</sup>H-NMR (500 MHz, CDCl<sub>3</sub>): δ = 10.45 (s, 1 H, OH), 7.83 (d, 1 H *J* = 1.9 Hz, 2-*H*), 7.34 (dd, *J* = 8.6, 2.2 Hz, 1 H, 6-*H*), 7.09 (d, *J* = 8.6 Hz, 1 H, 5-*H*), 6.27 (s, 1H, NH), 4.86 (dd, *J* = 13.1, 5.8 Hz, 1 H, CH), 3.77 (s, 3 H, COOCH<sub>3</sub>), 3.19 (dd, *J* = 14.1, 5.1 Hz, 1 H, CH<sub>2</sub>), 3.06 (dd, *J* = 14.1, 5.7 Hz, 1 H, CH<sub>2</sub>), 2.05 ppm (s, 3 H, NHCOCH<sub>3</sub>).

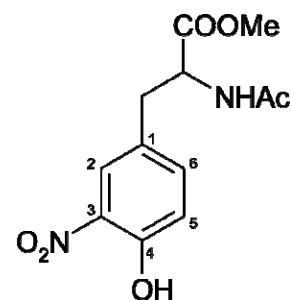

<sup>13</sup>C-NMR (125 MHz, CDCl<sub>3</sub>): δ = 171.5 (C<sub>q</sub>, NHCOCH<sub>3</sub>), 171.1 (C<sub>q</sub>, COOCH<sub>3</sub>), 154.4 (C<sub>q</sub>, C-4), 138.7 (C<sub>t</sub>, C-6), 133.5 (C<sub>q</sub>, C-3), 128.3 (C<sub>q</sub>, C-1), 125.3 (C<sub>t</sub>, C-2), 120.45 (C<sub>t</sub>, C-5), 53.4 (C<sub>t</sub>, CH), 53.0 (C<sub>p</sub>, COOCH<sub>3</sub>), 36.8 (C<sub>s</sub>, CH<sub>2</sub>), 23.0 ppm (C<sub>p</sub>, NHCOCH<sub>3</sub>).

HR-MS: C<sub>12</sub>H<sub>14</sub>N<sub>2</sub>O<sub>6</sub>+H: calcd 283.09246, found 283.09247.  
C<sub>11</sub><sup>13</sup>CH<sub>14</sub>N<sub>2</sub>O<sub>6</sub>+H: calcd 284.09582, found 284.09580.

**4b**; 2-(*N*-Nitrosoacetamido)-3-(4-hydroxy-3-nitro-phenyl)-propionic acid methyl ester (3-nitro-*N*-nitroso-*N*-Ac-*O*-Me-tyrosine)

<sup>1</sup>H-NMR (500 MHz, CDCl<sub>3</sub>): δ = 10.46 (s, 1 H, OH), 7.77 (s, 1 H, 2-*H*), 7.29 (dd, *J* = 8.6, 1.9 Hz, 1 H, 6-*H*), 7.05 (dd, *J* = 8.6, 1.3 Hz, 1 H, 5-*H*), 5.47 (dd, *J* = 9.7, 5.8 Hz, 1 H, CH), 3.69 (s, 3 H, COOCH<sub>3</sub>), 3.42 (dd, *J* = 14.6, 5.8 Hz, 3 H, CH<sub>2</sub>), 3.00 (dd, *J* = 14.6, 9.8 Hz, 1 H, CH<sub>2</sub>), 2.69 ppm (s, 3 H, N(NO)COCH<sub>3</sub>).

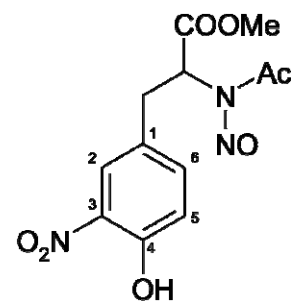

<sup>13</sup>C-NMR (125 MHz, CDCl<sub>3</sub>): δ = 173.9 (C<sub>q</sub>, NHCOCH<sub>3</sub>), 167.4 (C<sub>q</sub>, COOCH<sub>3</sub>), 154.3 (C<sub>q</sub>, C-4), 138.3 (C<sub>t</sub>, C-6), 133.4 (C<sub>q</sub>, C-3), 128.6 (C<sub>q</sub>, C-1), 125.1 (C<sub>t</sub>, C-2), 120.5 (C<sub>t</sub>, C-5), 53.1 (C<sub>t</sub>, CH), 52.0 (C<sub>p</sub>, COOCH<sub>3</sub>), 32.9 (C<sub>s</sub>, CH<sub>2</sub>), 22.6 ppm (C<sub>p</sub>, N(NO)COCH<sub>3</sub>).

**10a**; 2-Acetylamino-3-(4-hydroxy-3,5-dinitro-phenyl)-propionic acid methyl ester (3,5-dinitro-*N*-Ac-*O*-Me-tyrosine)

<sup>1</sup>H-NMR (500 MHz, CDCl<sub>3</sub>): δ = 11.34 (s, 1 H, OH), 8.09 (s, 1 H, NH), 6.16 (d, *J* = 6.4 Hz, 1 H, 2,6-*H*), 4.87 (q, *J* = 5.8 Hz, 1 H, CH), 3.82 (s, 3 H, COOCH<sub>3</sub>), 3.32 (dd, *J* = 14.2, 5.7 Hz, 1 H, CH<sub>2</sub>), 3.11 (dd, *J* = 14.2, 5.7 Hz, 1 H, CH<sub>2</sub>), 2.06 ppm (s, 3 H, NHCOCH<sub>3</sub>).

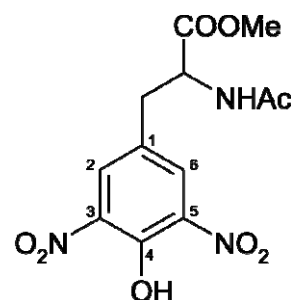

HR-MS: C<sub>12</sub>H<sub>13</sub>N<sub>3</sub>O<sub>8</sub>+H: calcd 328.0781, found 328.0779 (0.609 ppm).  
C<sub>11</sub><sup>13</sup>CH<sub>13</sub>N<sub>3</sub>O<sub>8</sub>+H: calcd 329.0814, found 329.0805 ( 2.734 ppm).

**10b**; 2-(*N*-Nitrosoacetamido)-3-(4-hydroxy-3,5-dinitro-phenyl)-propionic acid methyl ester (3,5-dinitro-*N*-nitroso-*N*-Ac-*O*-Me-tyrosine)

<sup>1</sup>H-NMR (500 MHz, CDCl<sub>3</sub>):  $\delta$  = 11.32 (s, 1 H, OH), 8.07 (s, 2 H, 2,6-*H*), 5.43 (dd, *J* = 8.4, 6.5 Hz, 1 H, CH), 3.69 (s, 3 H, COOCH<sub>3</sub>), 3.50 (dd, *J* = 14.7, 6.5 Hz, 1 H, CH<sub>2</sub>), 2.98 (dd, *J* = 14.7, 8.4 Hz, 1 H, CH<sub>2</sub>), 2.76 ppm (s, 3 H, NHCOCH<sub>3</sub>).

<sup>13</sup>C-NMR (125 MHz, CDCl<sub>3</sub>):  $\delta$  = 137.9 (C<sub>q</sub>, COOCH<sub>3</sub>), 166.9 (C<sub>q</sub>, NHCOCH<sub>3</sub>), 148.5 (C<sub>q</sub>, C-4), 137.5 (C<sub>q</sub>, C-3,5), 131.9 (C<sub>t</sub>, C-2,6), 128.3 (C<sub>q</sub>, C-1), 53.3 (C<sub>p</sub>, COOCH<sub>3</sub>), 51.5 (C<sub>s</sub>, CH), 33.0 (C<sub>t</sub>, CH<sub>2</sub>), 22.6 ppm (C<sub>p</sub>, NHCOCH<sub>3</sub>).

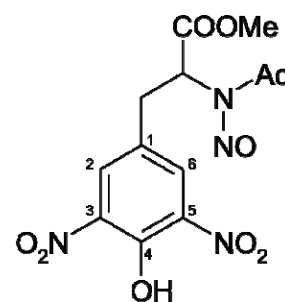

HR-MS: C<sub>12</sub>H<sub>12</sub>N<sub>4</sub>O<sub>9</sub>+H: calcd 357.0677, found 357.0679.  
 C<sub>11</sub><sup>13</sup>CH<sub>12</sub>N<sub>4</sub>O<sub>9</sub>+H: calcd 358.0716, found 358.0724.

Supplementary Material (ESI) for Organic & Biomolecular Chemistry  
This journal is (c) The Royal Society of Chemistry 2011

**4a**

<sup>1</sup>H NMR:

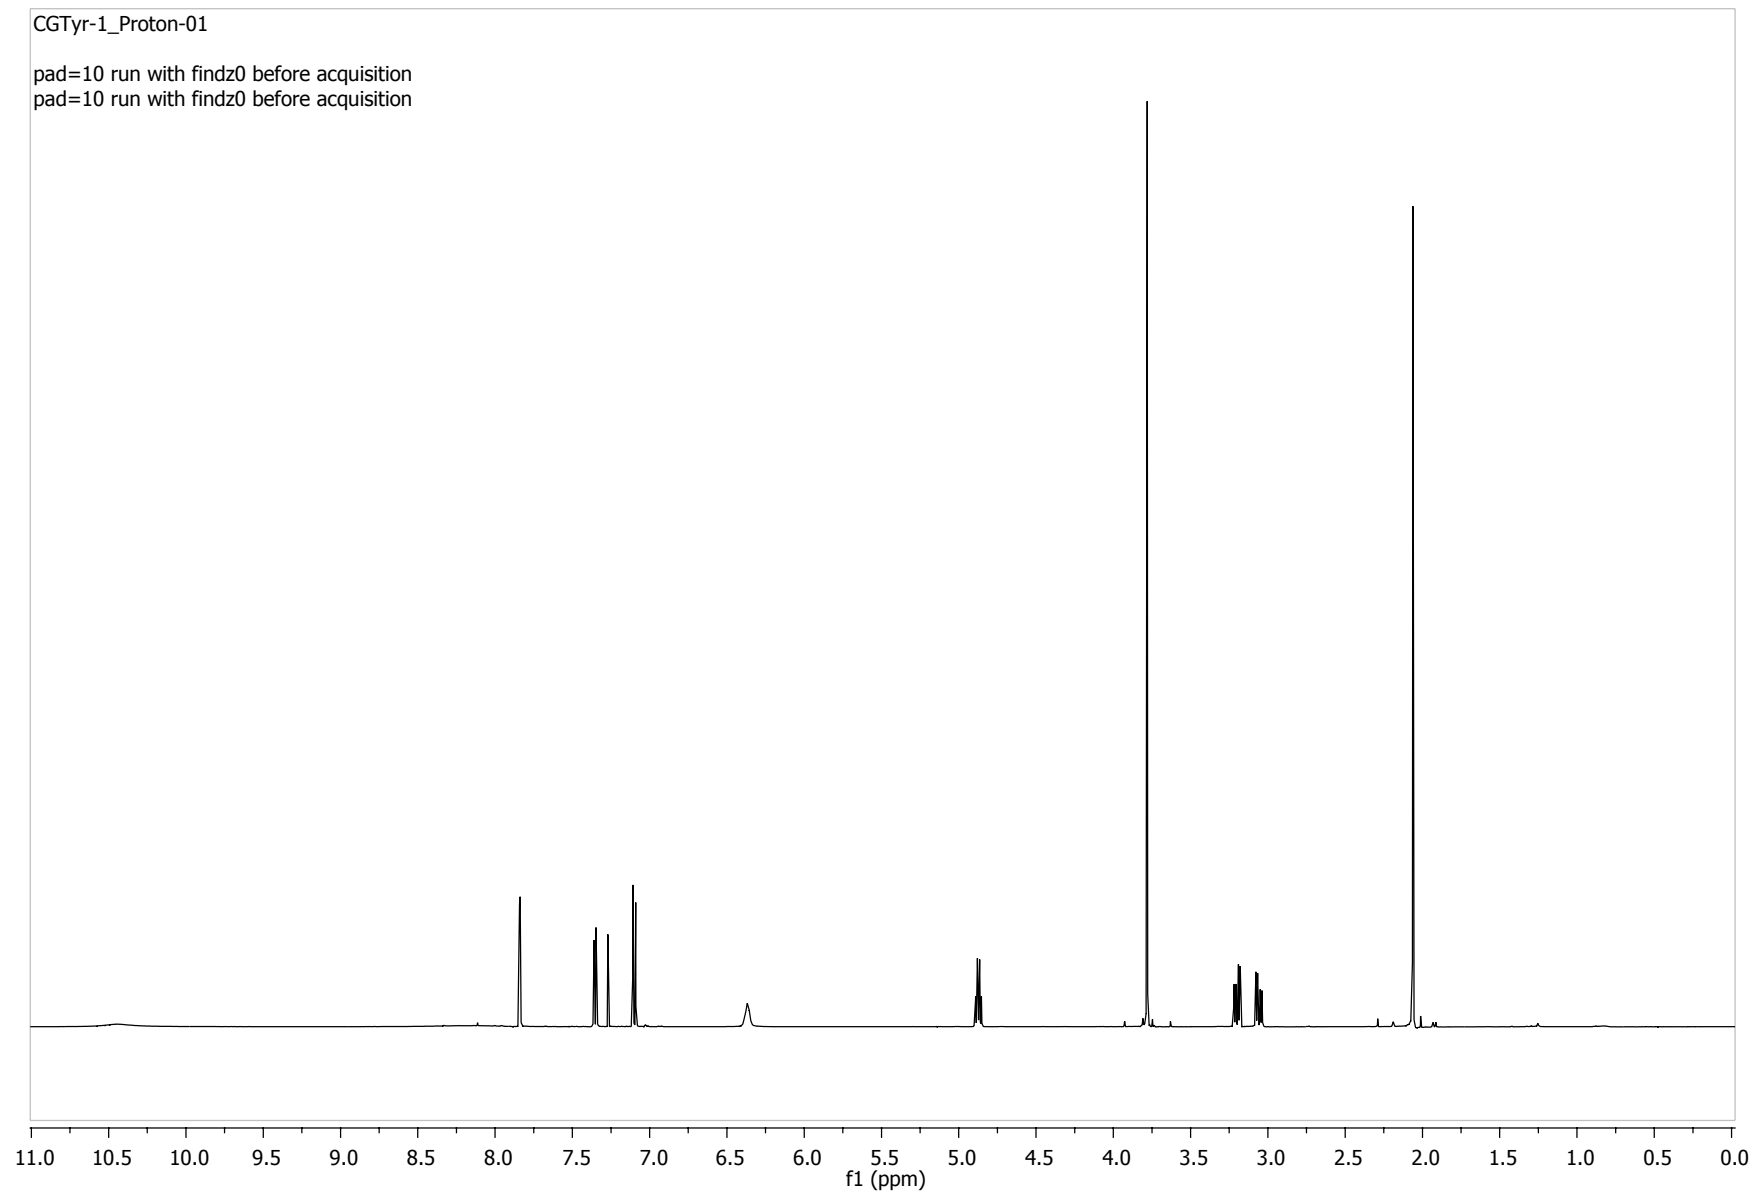



Supplementary Material (ESI) for Organic & Biomolecular Chemistry  
This journal is (c) The Royal Society of Chemistry 2011

**4a**

<sup>13</sup>C NMR:

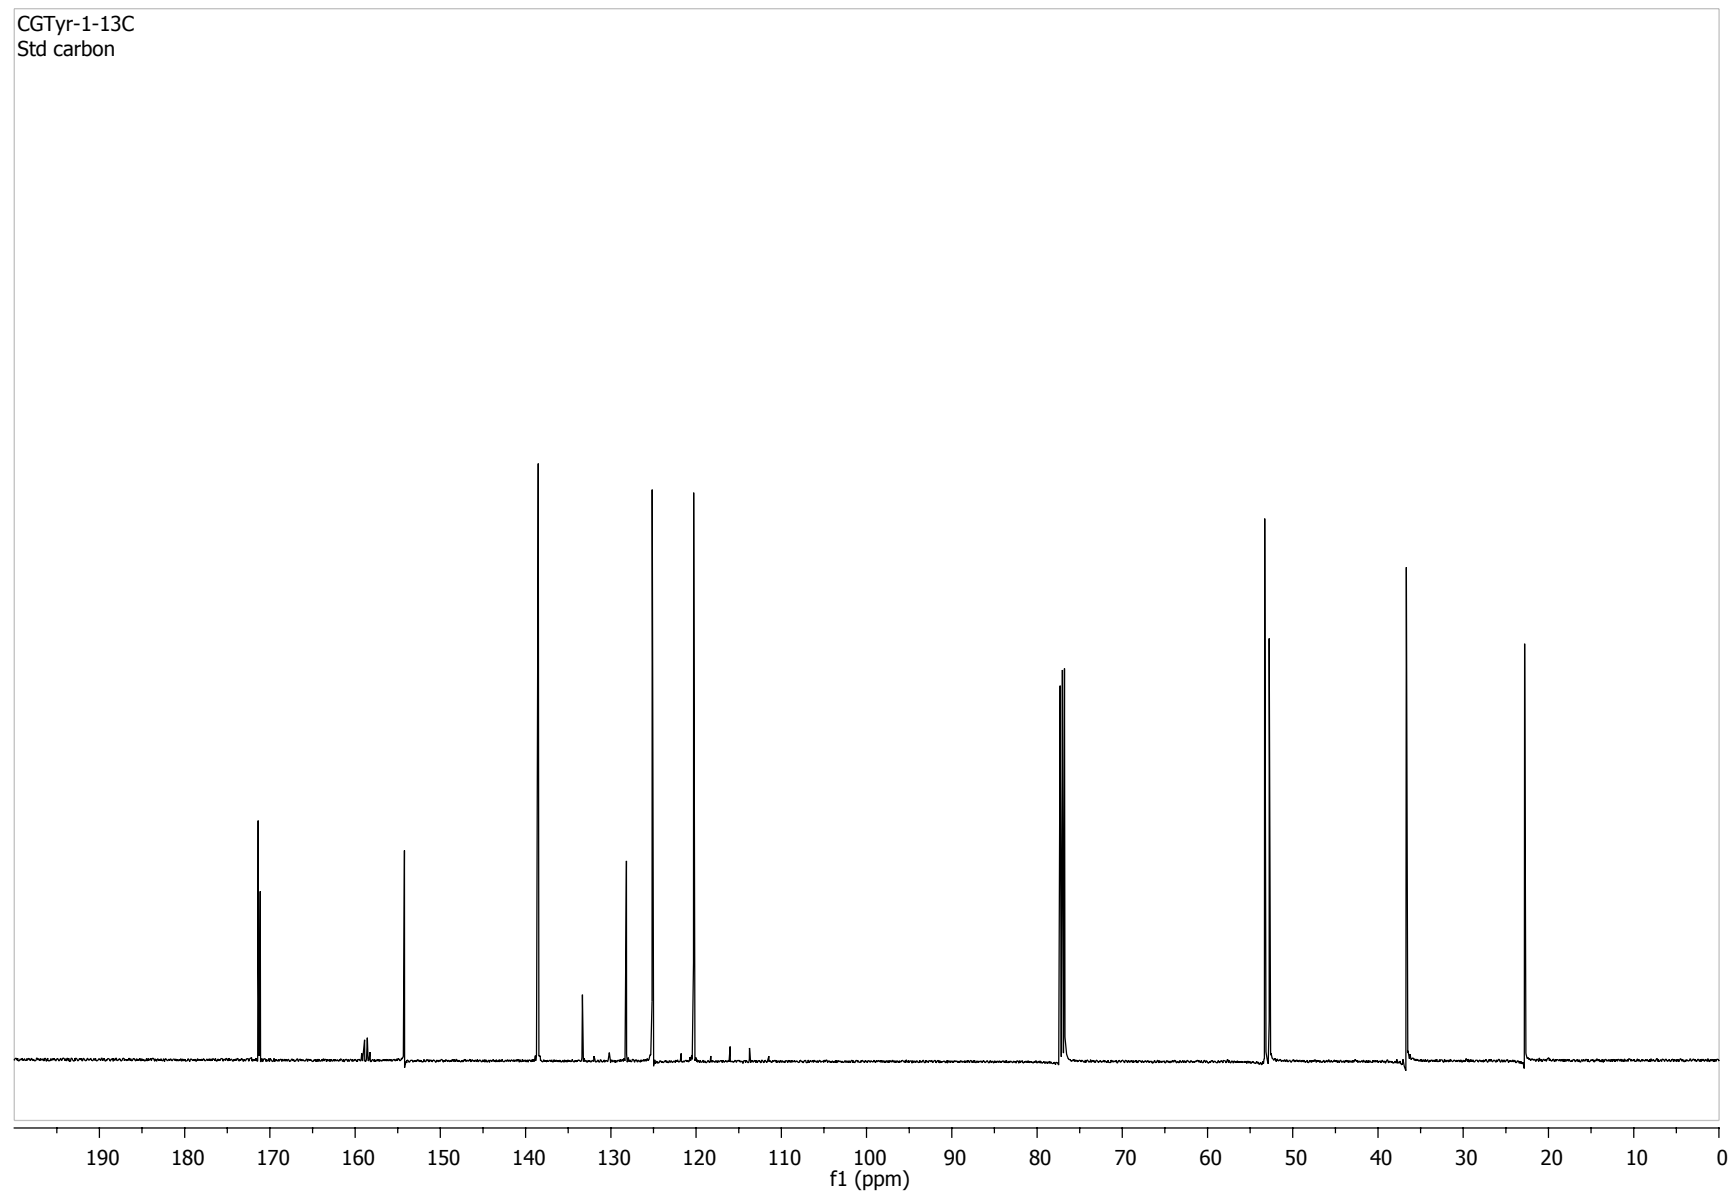

Supplementary Material (ESI) for Organic & Biomolecular Chemistry  
This journal is (c) The Royal Society of Chemistry 2011

**4b**

<sup>1</sup>H NMR:

CGTyr-2-5-1H  
Std proton

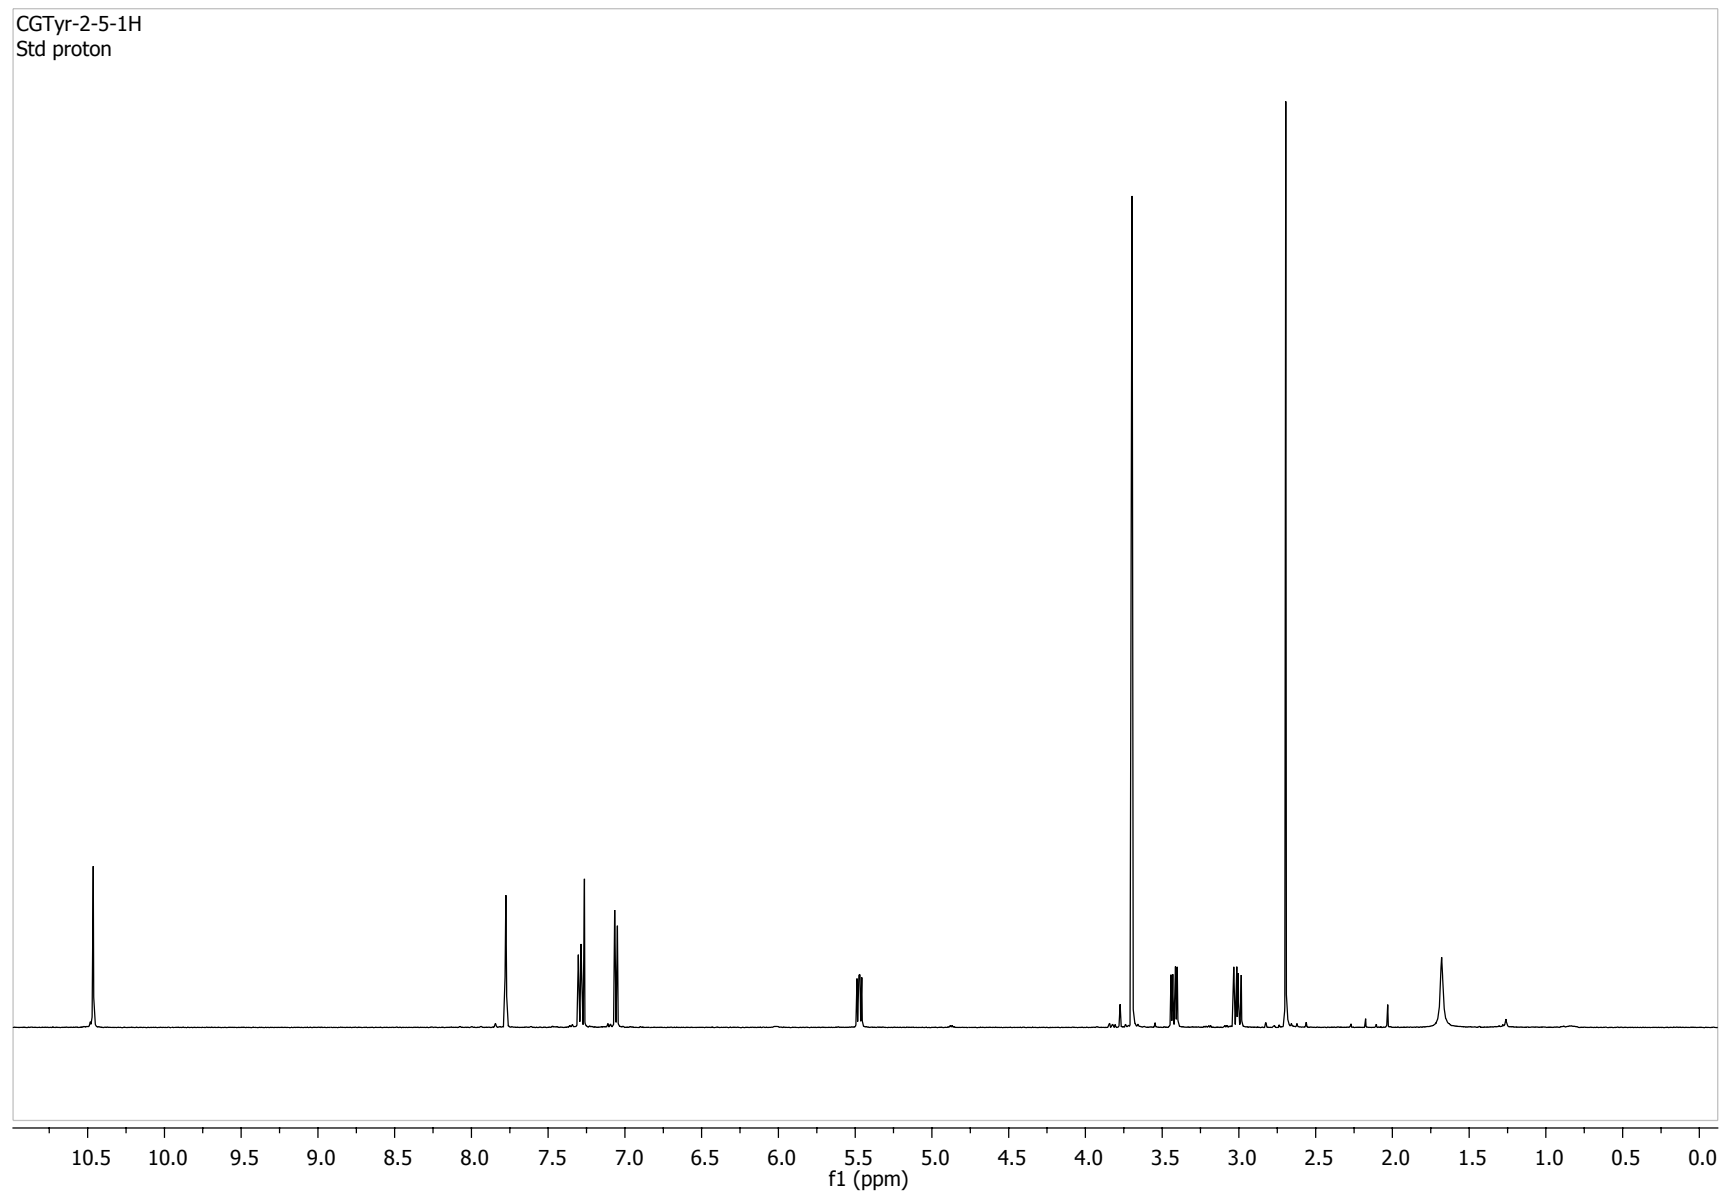

Supplementary Material (ESI) for Organic & Biomolecular Chemistry  
This journal is (c) The Royal Society of Chemistry 2011

**4b**

<sup>13</sup>C NMR:

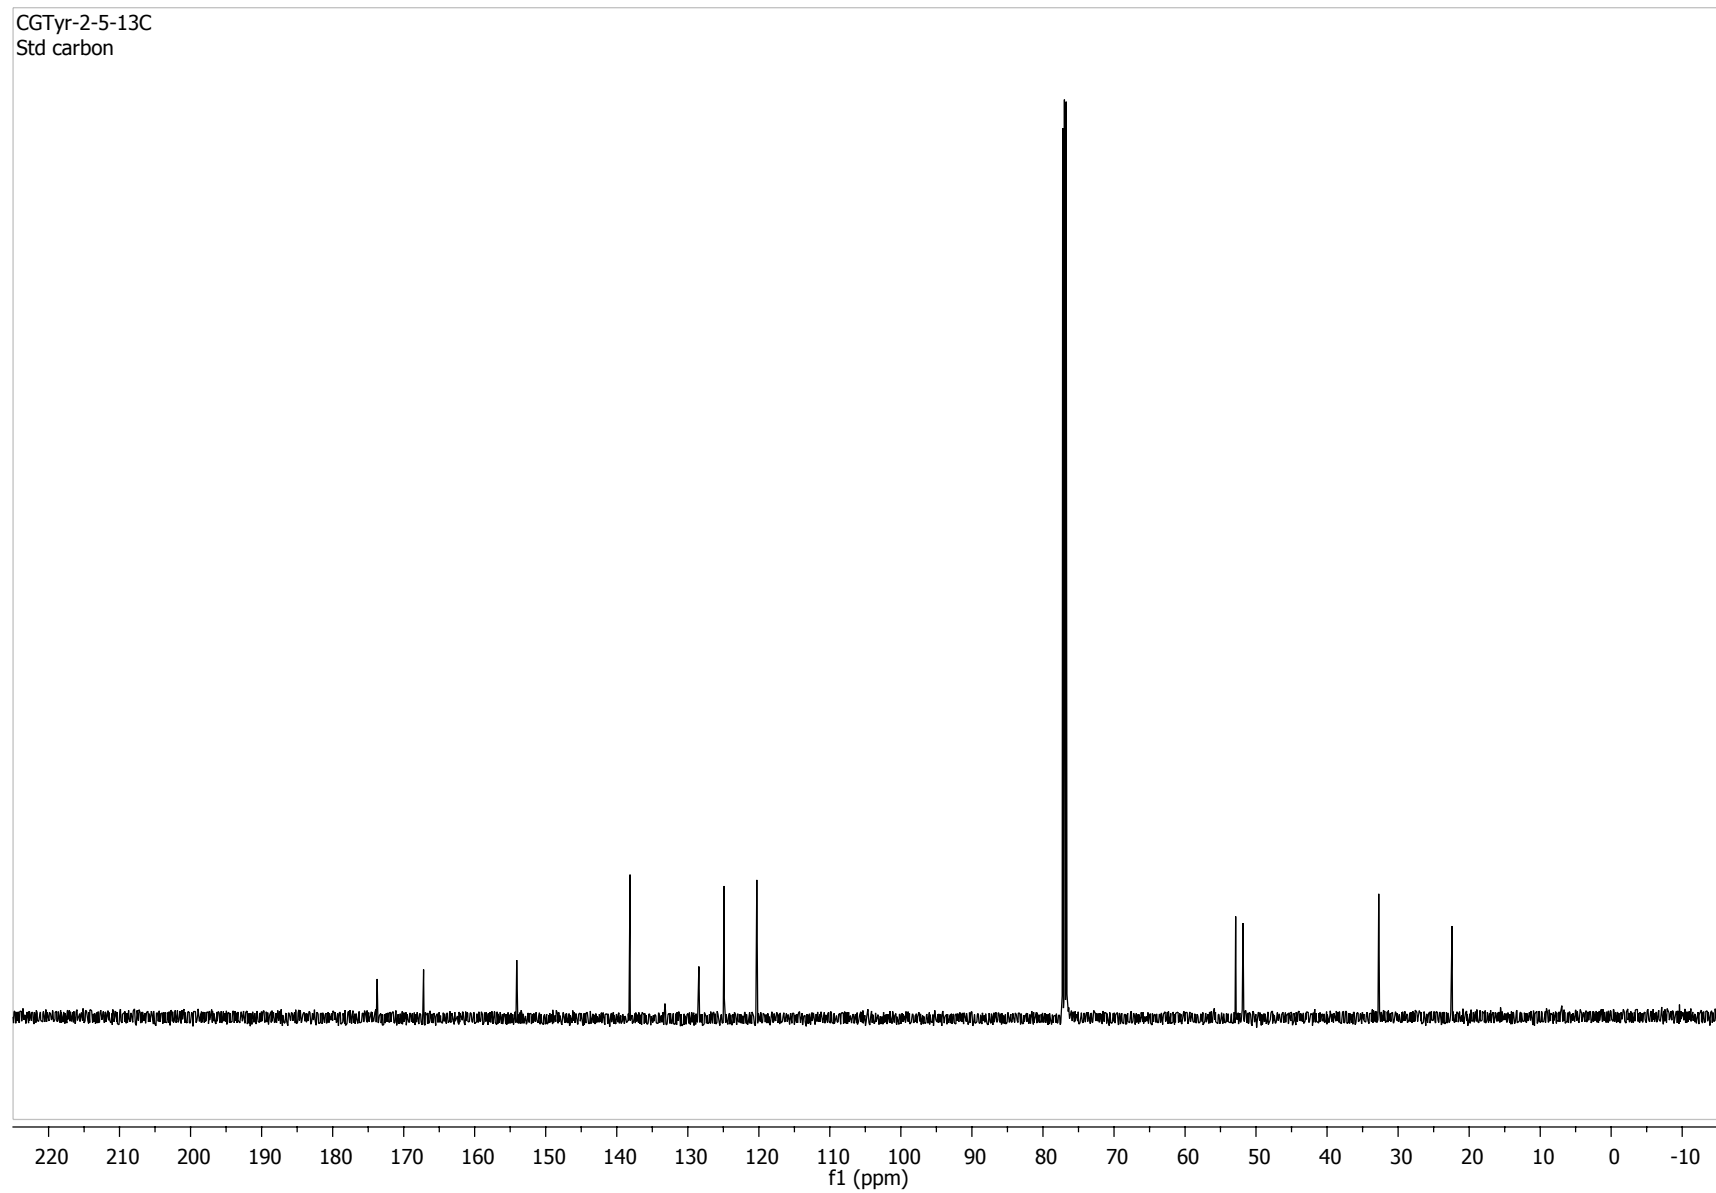

10a

$^1\text{H}$  NMR:

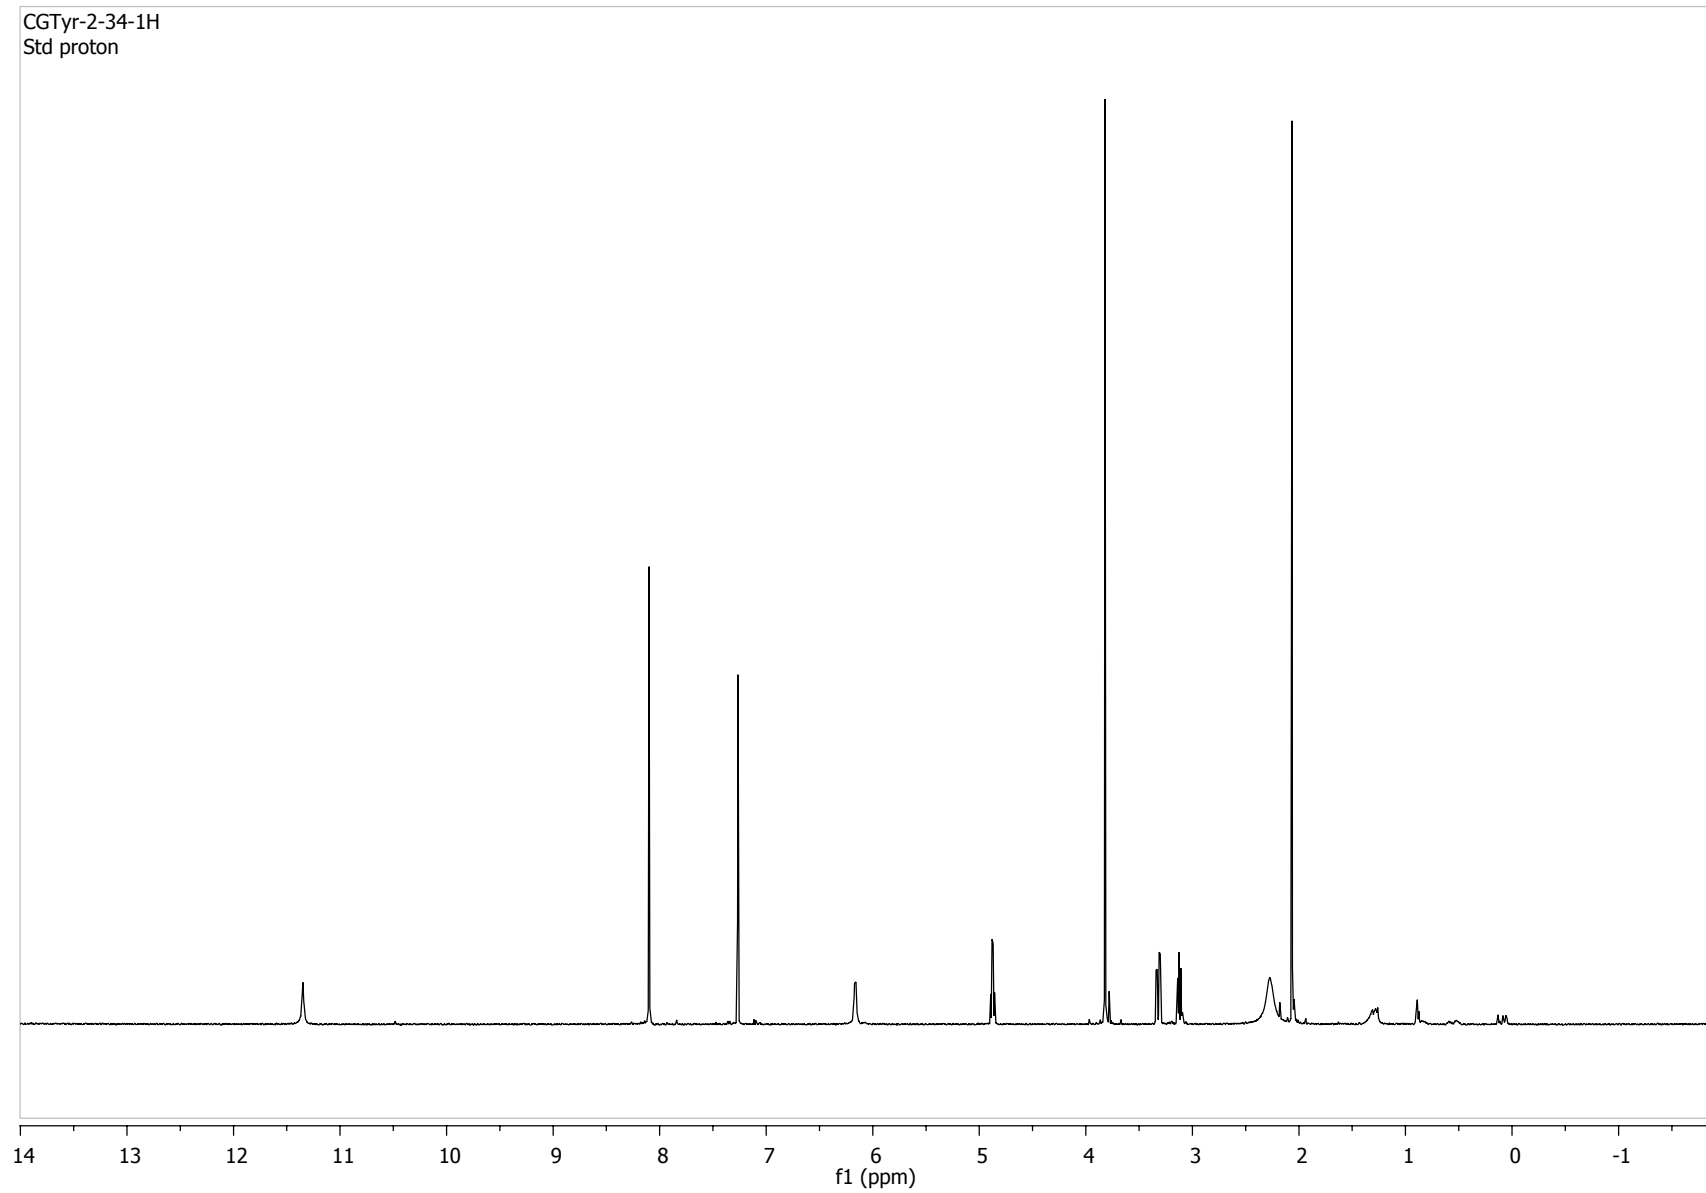

**10a**

HPLC:

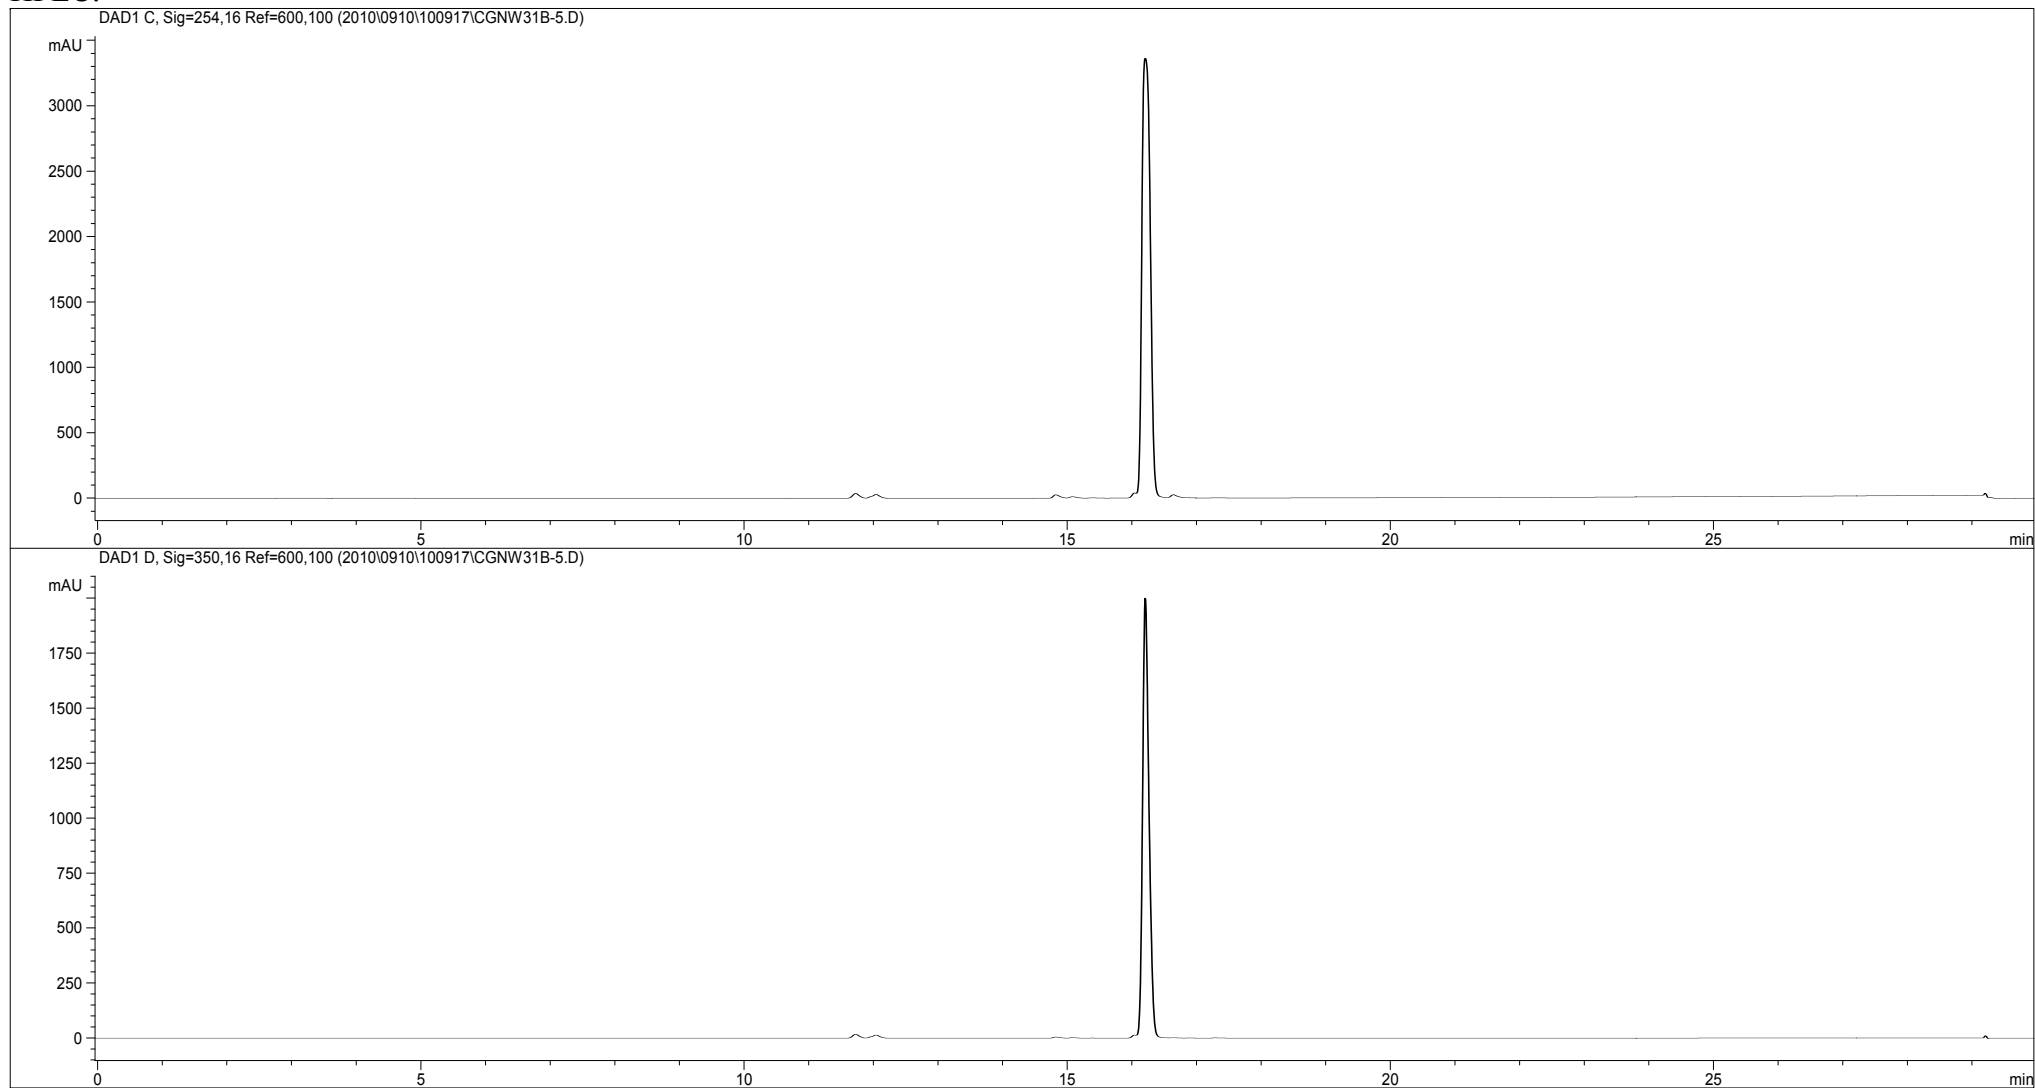



Supplementary Material (ESI) for Organic & Biomolecular Chemistry  
This journal is (c) The Royal Society of Chemistry 2011

**10b**

<sup>1</sup>H NMR:

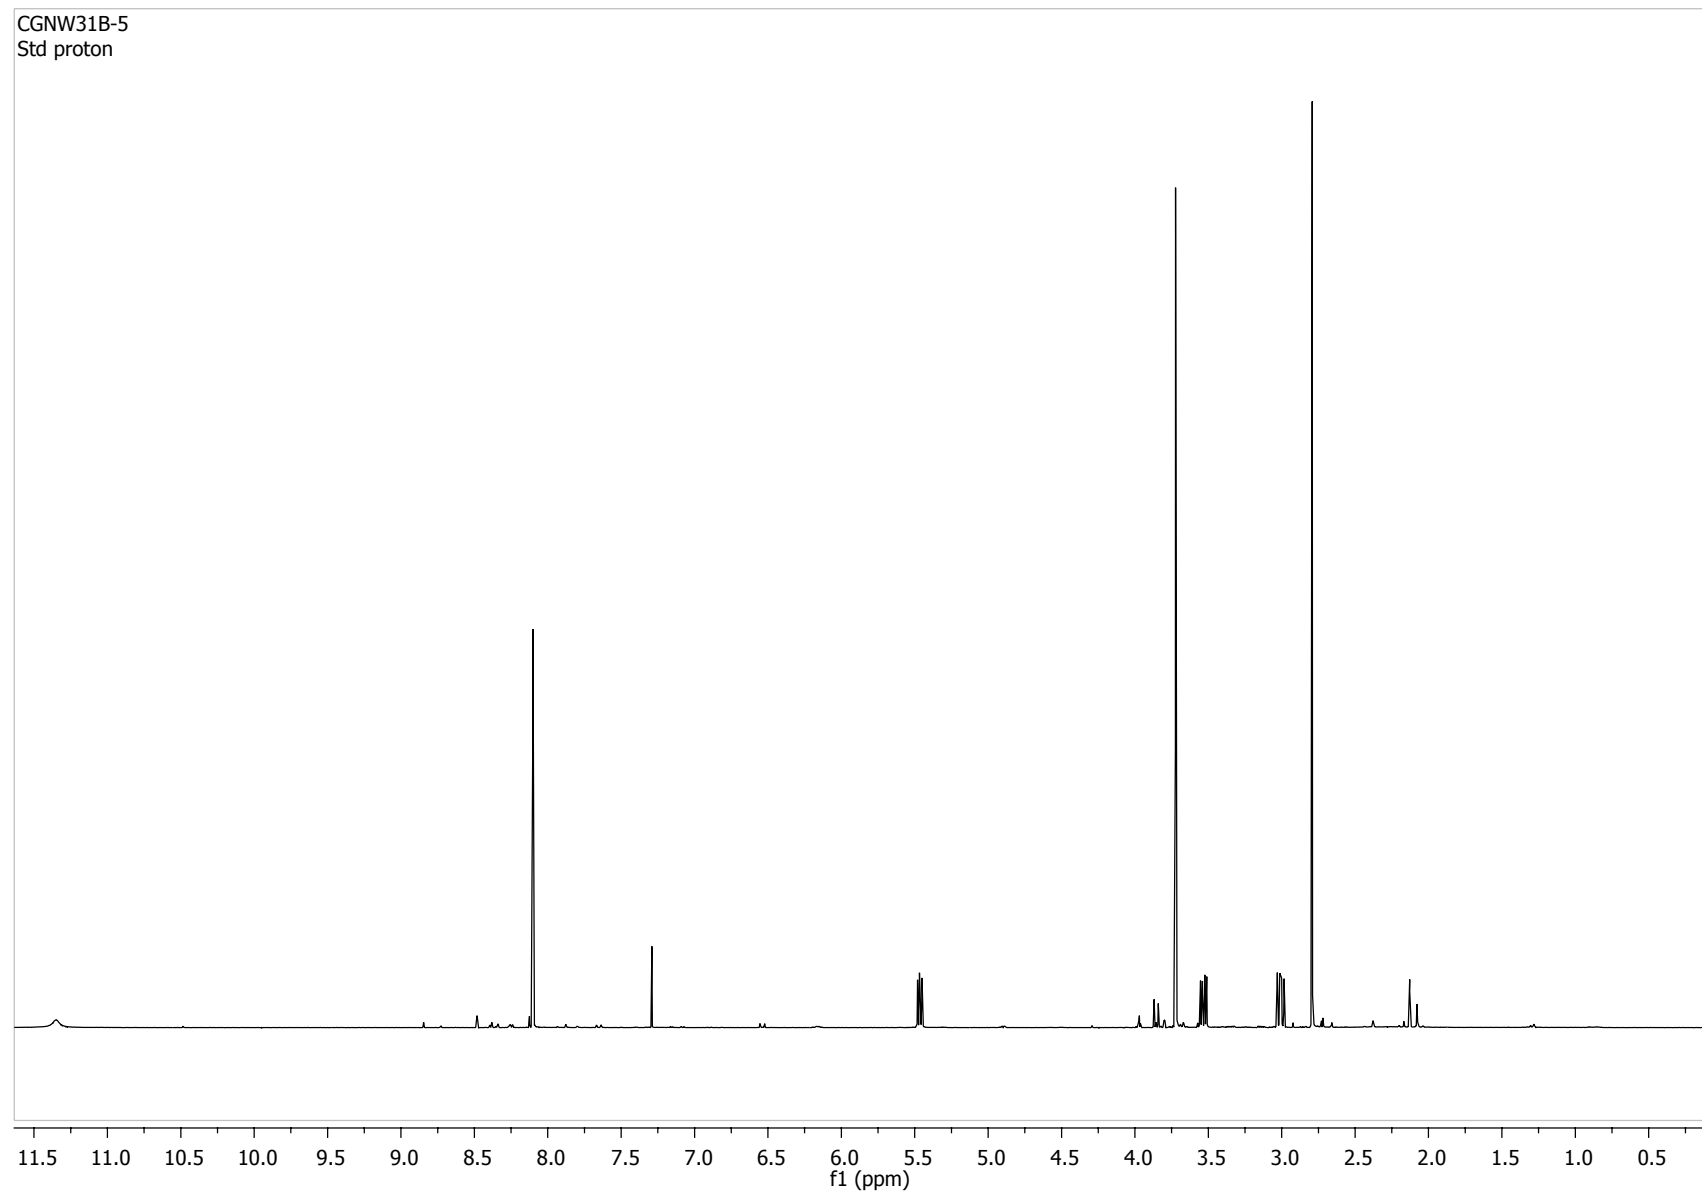

Supplementary Material (ESI) for Organic & Biomolecular Chemistry  
This journal is (c) The Royal Society of Chemistry 2011

**10b**

<sup>13</sup>C NMR:

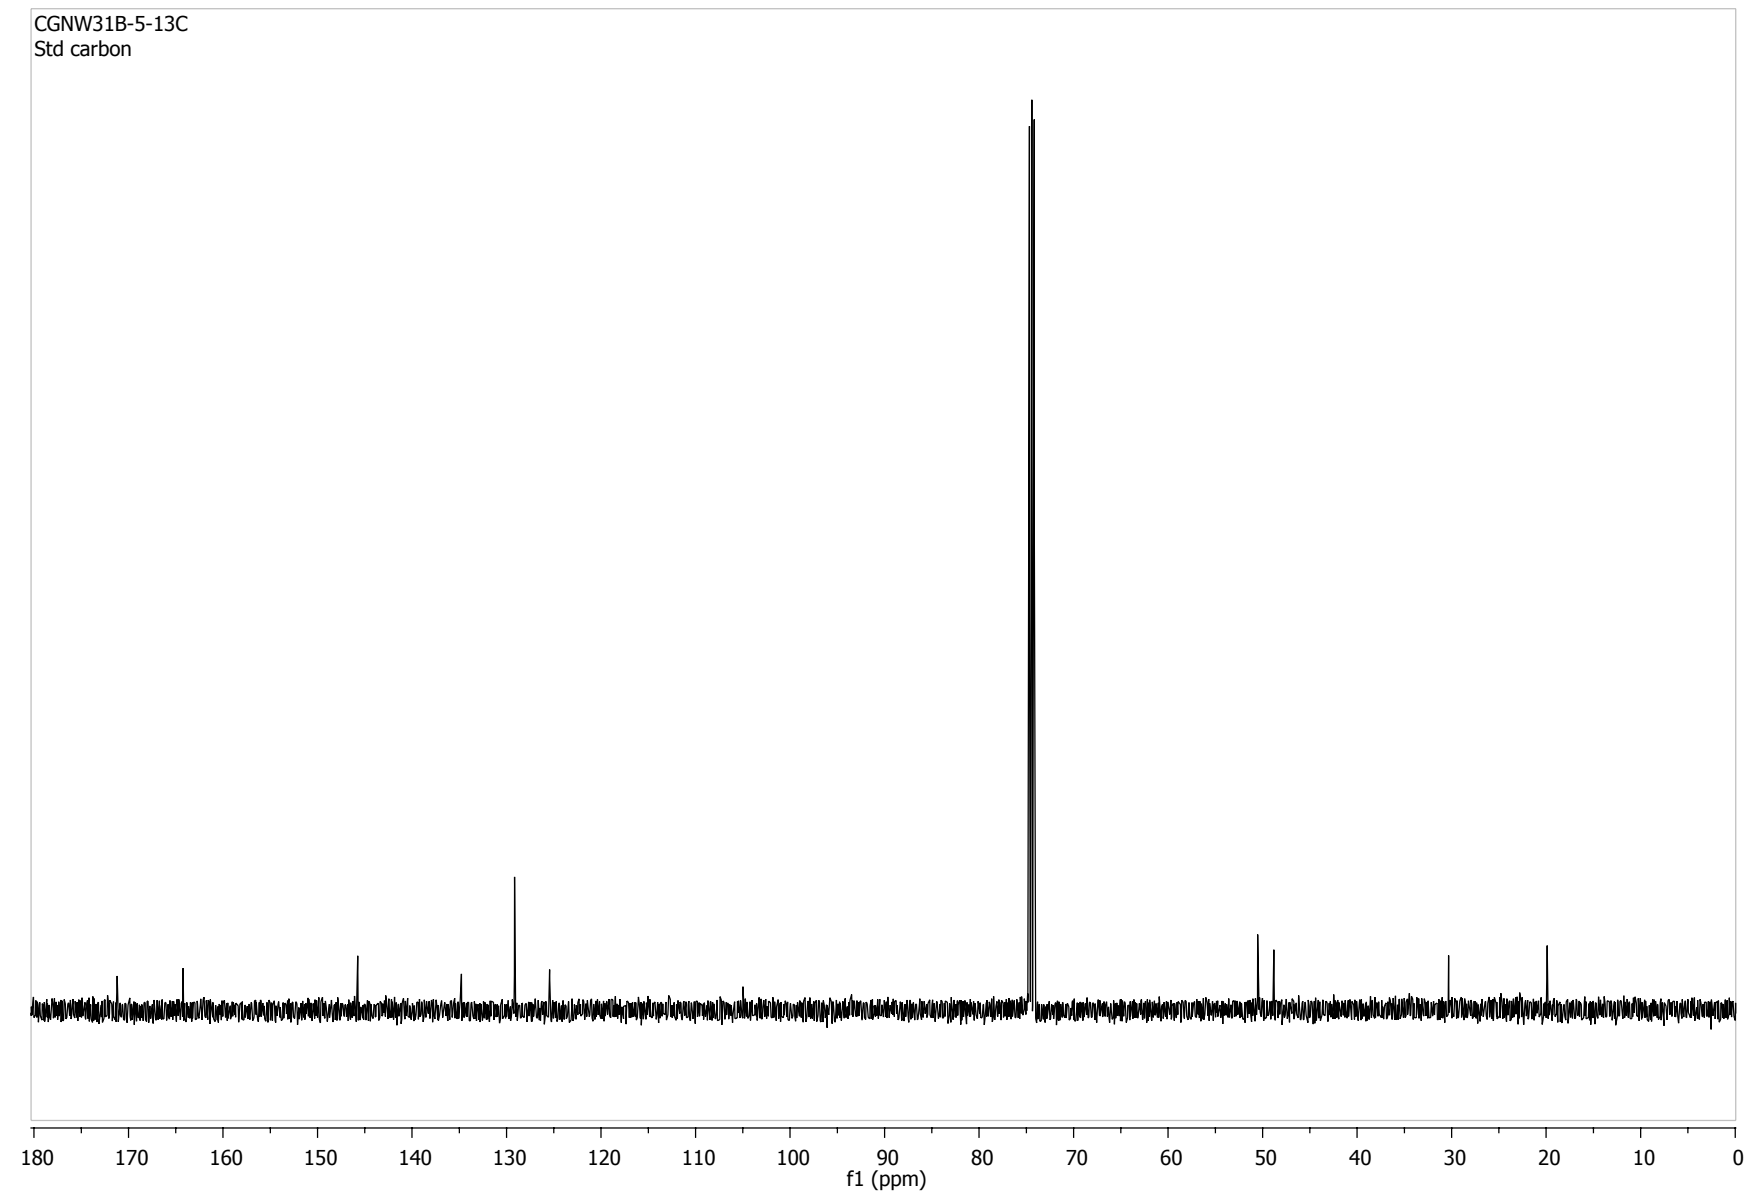

10b

HPLC:

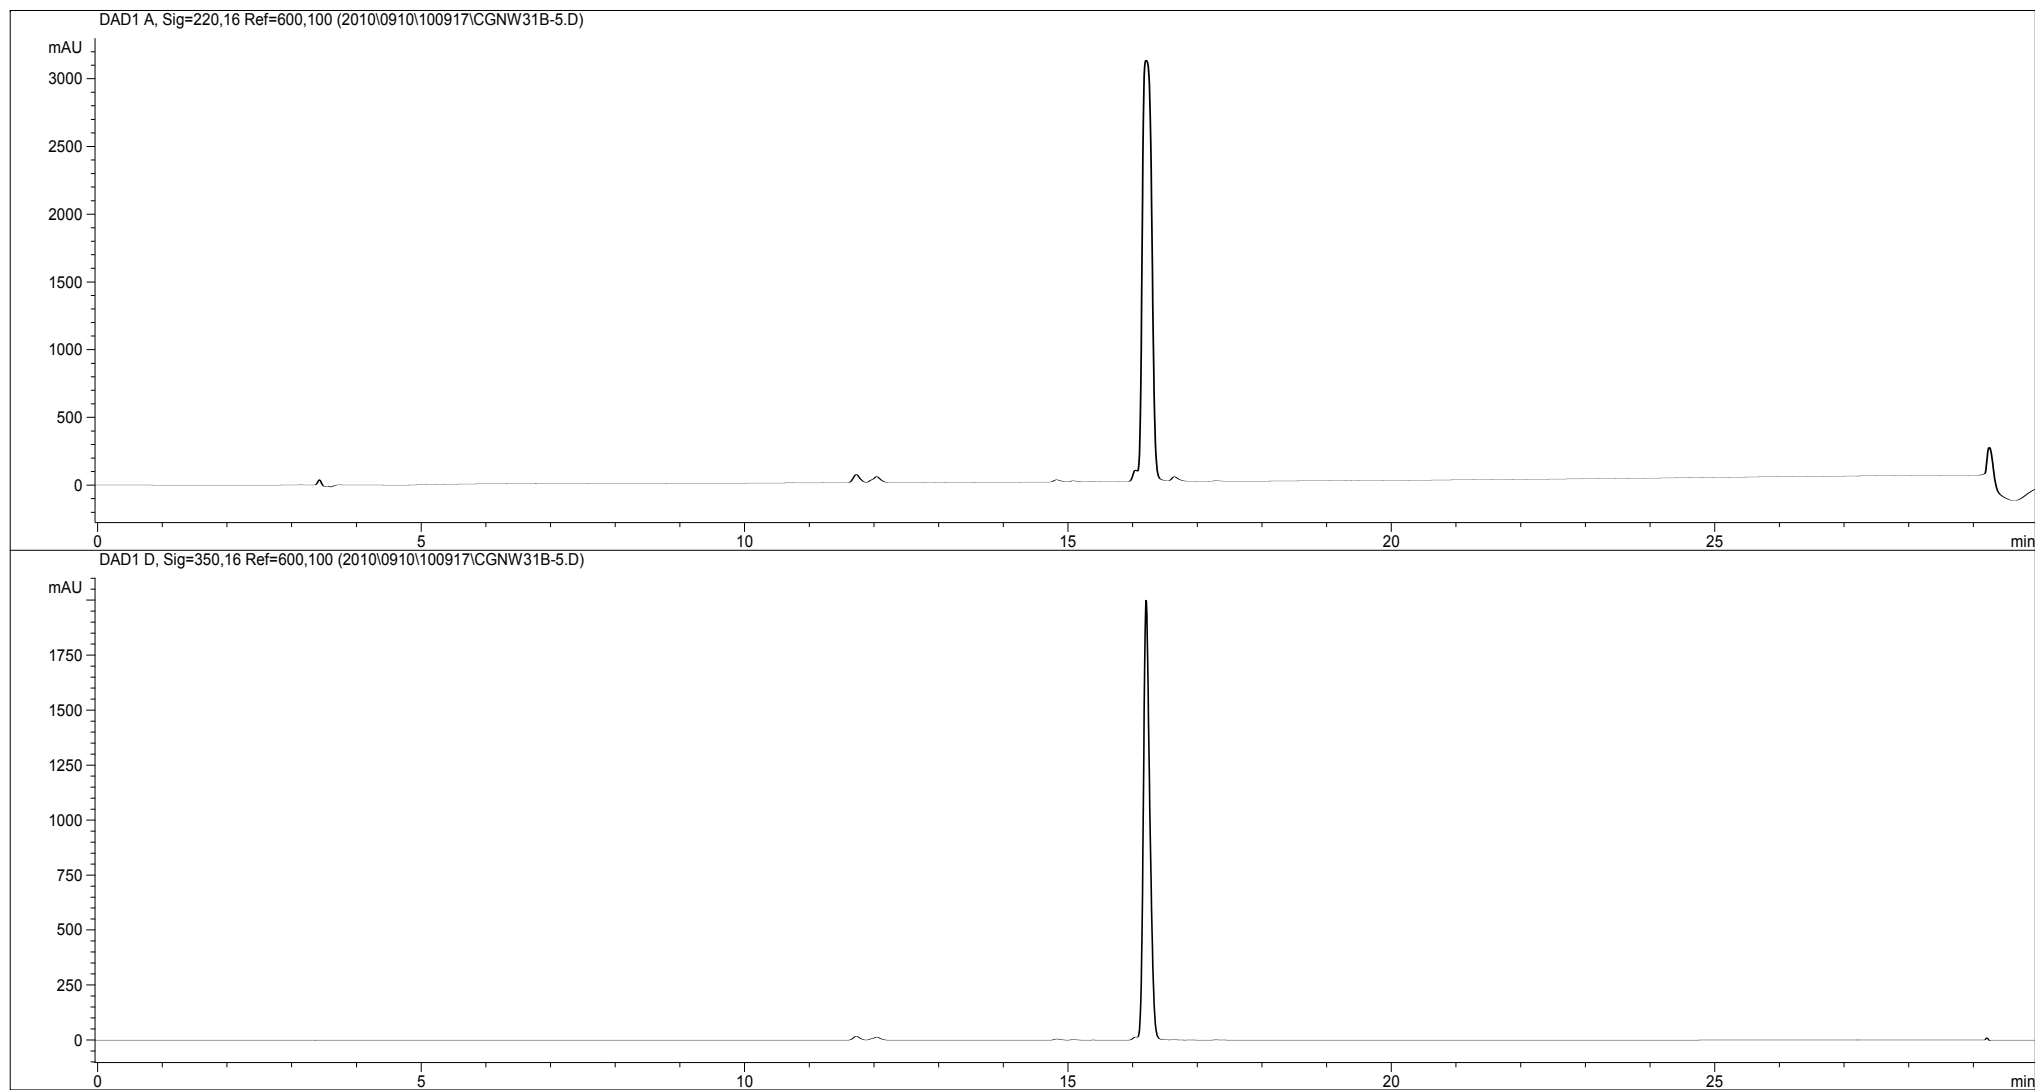

### 1.2.4 Reaction of *O*-acetyltyrosine **3a** with $\text{NO}_3^\bullet$

**3b**; 3-(4-Acetoxy-phenyl)-2-(*N*-Nitrosoacetamido)-propionic acid methyl ester (*N*-nitroso-*N*-Ac-*O*-Me-tyrosine-*O*-Ac)

$^1\text{H-NMR}$  (500 MHz,  $\text{CDCl}_3$ ):  $\delta$  = 7.02 (d,  $J$  = 8.5 Hz, 2 H, 2,6-*H*), 6.96 (d,  $J$  = 8.5 Hz, 2 H, 3,5-*H*), 5.54 (dd,  $J$  = 10.2, 5.9 Hz, 1 H, *CH*), 3.68 (s, 3 H,  $\text{COOCH}_3$ ), 3.42 (dd,  $J$  = 14.4, 5.9 Hz, 1 H,  $\text{CH}_2$ ), 3.05 (dd,  $J$  = 14.4, 10.2 Hz, 1 H,  $\text{CH}_2$ ), 2.62 (s, 3 H,  $\text{OCOCH}_3$ ), 2.26 ppm (s, 3 H,  $\text{N}(\text{NO})\text{COCH}_3$ ).

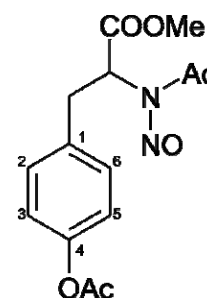

$^{13}\text{C-NMR}$  (125 MHz,  $\text{CDCl}_3$ ):  $\delta$  = 173.8 ( $\text{C}_q$ ,  $\text{OCOCH}_3$ ), 169.3 ( $\text{C}_q$ ,  $\text{NHCOCH}_3$ ), 167.7 ( $\text{C}_q$ ,  $\text{COOCH}_3$ ), 149.8 ( $\text{C}_q$ , *C*-4), 133.6 ( $\text{C}_q$ , *C*-1), 129.9 ( $\text{C}_t$ , *C*-2,6), 122.0 ( $\text{C}_t$ , *C*-3,5), 52.8 ( $\text{C}_t$ , *CH*), 52.3 ( $\text{C}_p$ ,  $\text{COOCH}_3$ ), 33.2 ( $\text{C}_s$ ,  $\text{CH}_2$ ), 22.3 ( $\text{C}_p$ ,  $\text{OCOCH}_3$ ), 21.1 ppm ( $\text{C}_p$ ,  $\text{N}(\text{NO})\text{COCH}_3$ ).

**11a**; 3-(4-Acetoxy-3-nitro-phenyl)-2-acetyl-amino-propionic acid methyl ester (3-nitro-*N*-Ac-*O*-Me-tyrosine-*O*-Ac)

$^1\text{H-NMR}$  (500 MHz,  $\text{CDCl}_3$ ):  $\delta$  = 7.82 (d,  $J$  = 2.1 Hz, 1 H, 2-*H*), 7.42 (dd,  $J$  = 8.3, 2.2 Hz, 1 H, 6-*H*), 7.17 (d,  $J$  = 8.3 Hz, 1 H, 5-*H*), 6.29 (d,  $J$  = 6.6 Hz, 1 H, *NH*), 4.90 (dt,  $J$  = 7.3, 5.8 Hz, 1 H, *CH*), 3.77 (s, 3 H,  $\text{COOCH}_3$ ), 3.27 (dd,  $J$  = 14.1, 5.9 Hz, 1 H,  $\text{CH}_2$ ), 3.16 (dd,  $J$  = 14.1, 5.6 Hz, 1 H,  $\text{CH}_2$ ), 2.36 (s, 3 H,  $\text{OCOCH}_3$ ), 2.06 ppm (s, 3 H,  $\text{NHCOCH}_3$ ).

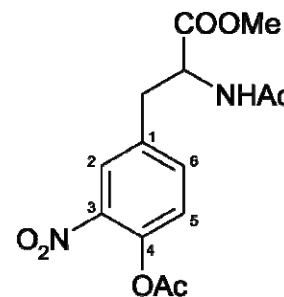

$^{13}\text{C-NMR}$  (125 MHz,  $\text{CDCl}_3$ ):  $\delta$  = 171.2 ( $\text{C}_q$ ,  $\text{COOCH}_3$ ), 171.1 ( $\text{C}_q$ ,  $\text{NHCOCH}_3$ ), 168.7 ( $\text{C}_q$ ,  $\text{OCOCH}_3$ ), 143.2 ( $\text{C}_q$ , *C*-4), 141.4 ( $\text{C}_q$ , *C*-3), 135.6 ( $\text{C}_t$ , *C*-6), 135.2 ( $\text{C}_q$ , *C*-1), 126.4 ( $\text{C}_t$ , *C*-2), 125.5 ( $\text{C}_t$ , *C*-5), 53.2 ( $\text{C}_t$ , *CH*), 52.9 ( $\text{C}_p$ ,  $\text{COOCH}_3$ ), 36.9 ( $\text{C}_s$ ,  $\text{CH}_2$ ), 22.9 ( $\text{C}_p$ ,  $\text{NHCOCH}_3$ ), 20.9 ppm ( $\text{C}_p$ ,  $\text{OCOCH}_3$ ).

HR-MS:  $\text{C}_{14}\text{H}_{16}\text{N}_2\text{O}_7+\text{H}$ : calcd 325.10303, found 325.10297.  
 $\text{C}_{13}^{13}\text{CH}_{16}\text{N}_2\text{O}_7+\text{H}$ : calcd 326.10638, found 326.10641.

**11b**; 3-(4-Acetoxy-3-nitro-phenyl)-2-(*N*-Nitrosoacetamido)-propionic acid methyl ester (3-nitro-*N*-nitroso-*N*-Ac-*O*-Me-tyrosine-*O*-Ac)

$^1\text{H-NMR}$  (500 MHz,  $\text{CDCl}_3$ ):  $\delta$  = 7.77 (d,  $J$  = 2.2 Hz, 1 H, 3-*H*), 7.37 (dd,  $J$  = 8.3, 2.2 Hz, 1 H, 5-*H*), 7.13 (d,  $J$  = 8.3 Hz, 1 H, 6-*H*), 5.50 (dd,  $J$  = 9.2, 6.2 Hz, 1 H, *CH*), 3.69 (s, 3 H,  $\text{COOCH}_3$ ), 3.51 (dd,  $J$  = 14.5, 6.2 Hz, 1 H,  $\text{CH}_2$ ), 3.05 (dd,  $J$  = 14.5, 9.2 Hz, 1 H,  $\text{CH}_2$ ), 2.70 (s, 3 H,  $\text{OCOCH}_3$ ), 2.35 ppm (s, 3 H,  $\text{NHCOCH}_3$ ).

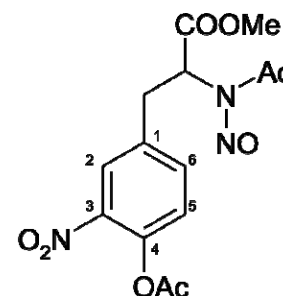

$^{13}\text{C-NMR}$  (125 MHz,  $\text{CDCl}_3$ ):  $\delta$  = 173.9 ( $\text{C}_q$ ,  $\text{COOCH}_3$ ), 168.6 ( $\text{C}_q$ ,  $\text{NHCOCH}_3$ ), 167.3 ( $\text{C}_q$ ,  $\text{OCOCH}_3$ ), 143.2 ( $\text{C}_q$ , *C*-4), 141.5 ( $\text{C}_q$ , *C*-2), 135.6 ( $\text{C}_q$ , *C*-1), 135.3 ( $\text{C}_t$ , *C*-6), 126.2 ( $\text{C}_t$ , *C*-5), 125.6 ( $\text{C}_t$ , *C*-3), 53.1 ( $\text{C}_t$ , *CH*), 51.8 ( $\text{C}_p$ ,  $\text{COOCH}_3$ ), 33.3 ( $\text{C}_s$ ,  $\text{CH}_2$ ), 22.5 ( $\text{C}_p$ ,  $\text{NHCOCH}_3$ ), 20.9 ppm ( $\text{C}_p$ ,  $\text{OCOCH}_3$ ).

**3b**

$^1\text{H}$  NMR:

CG39C-5-1H  
Std proton

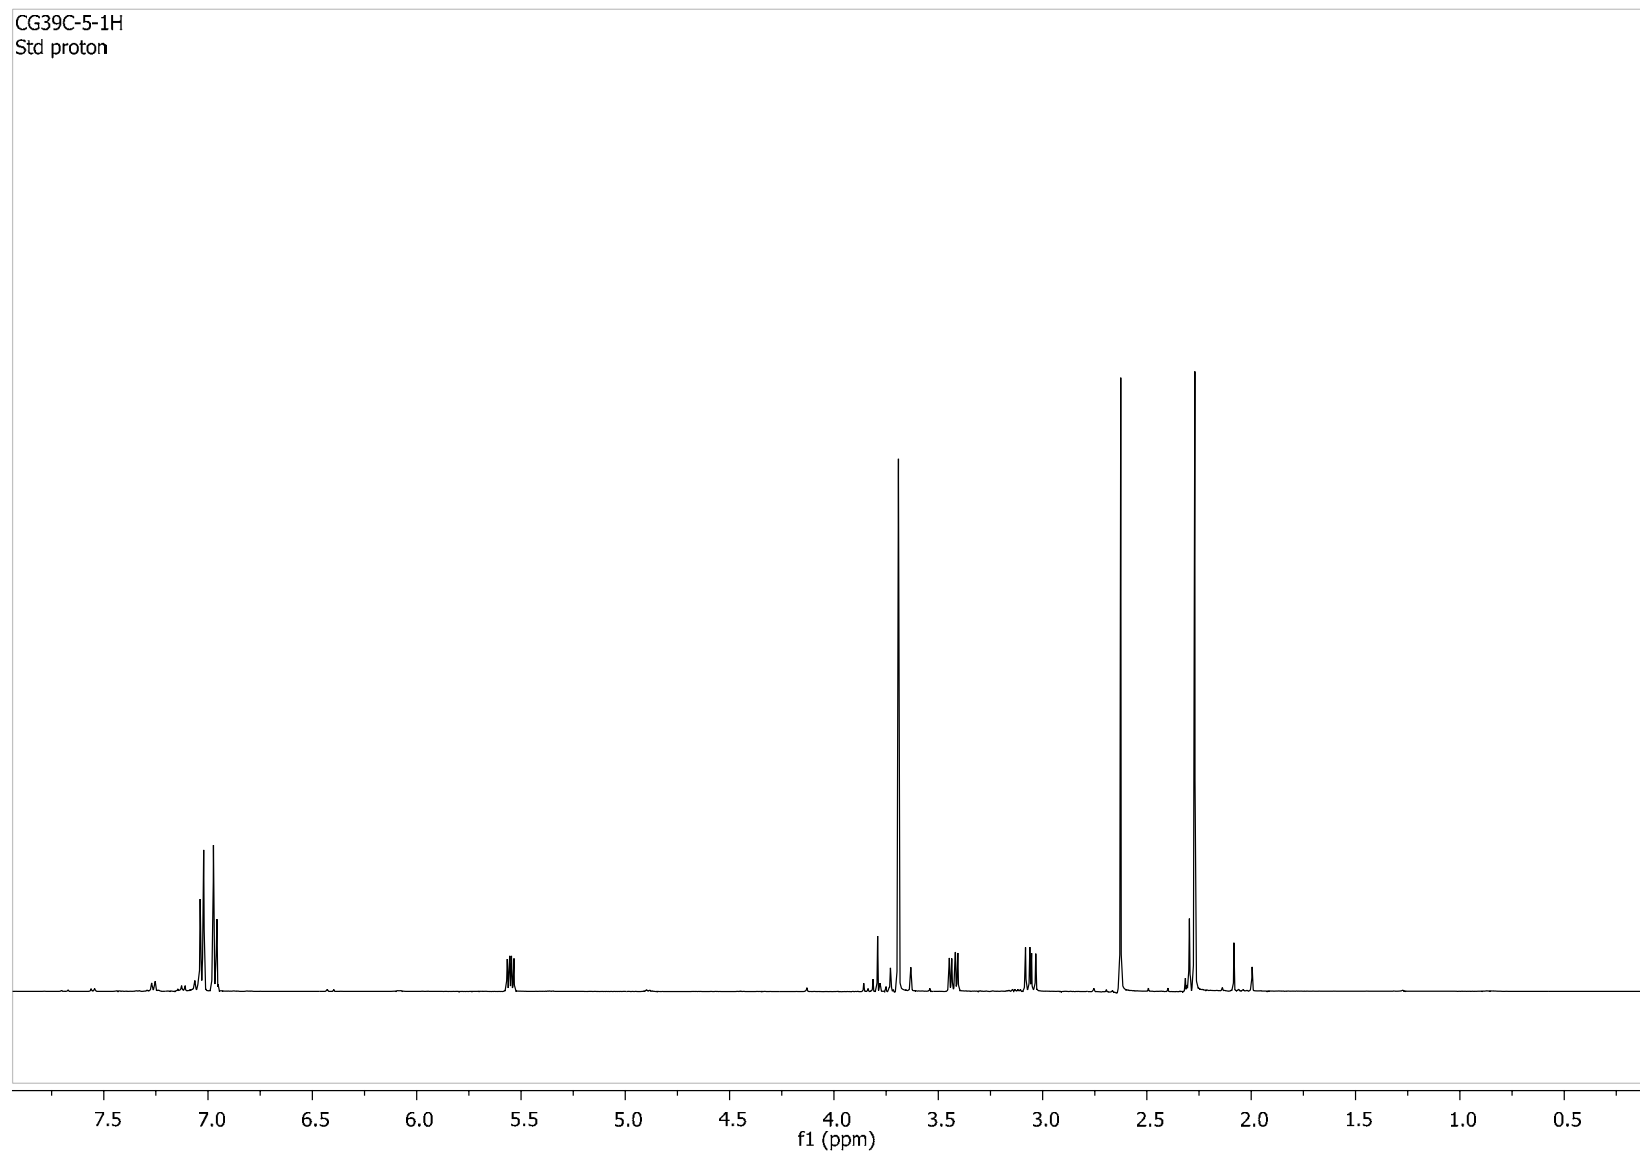

**3b**

$^{13}\text{C}$  NMR:



CG39C-5-13C  
Std carbon

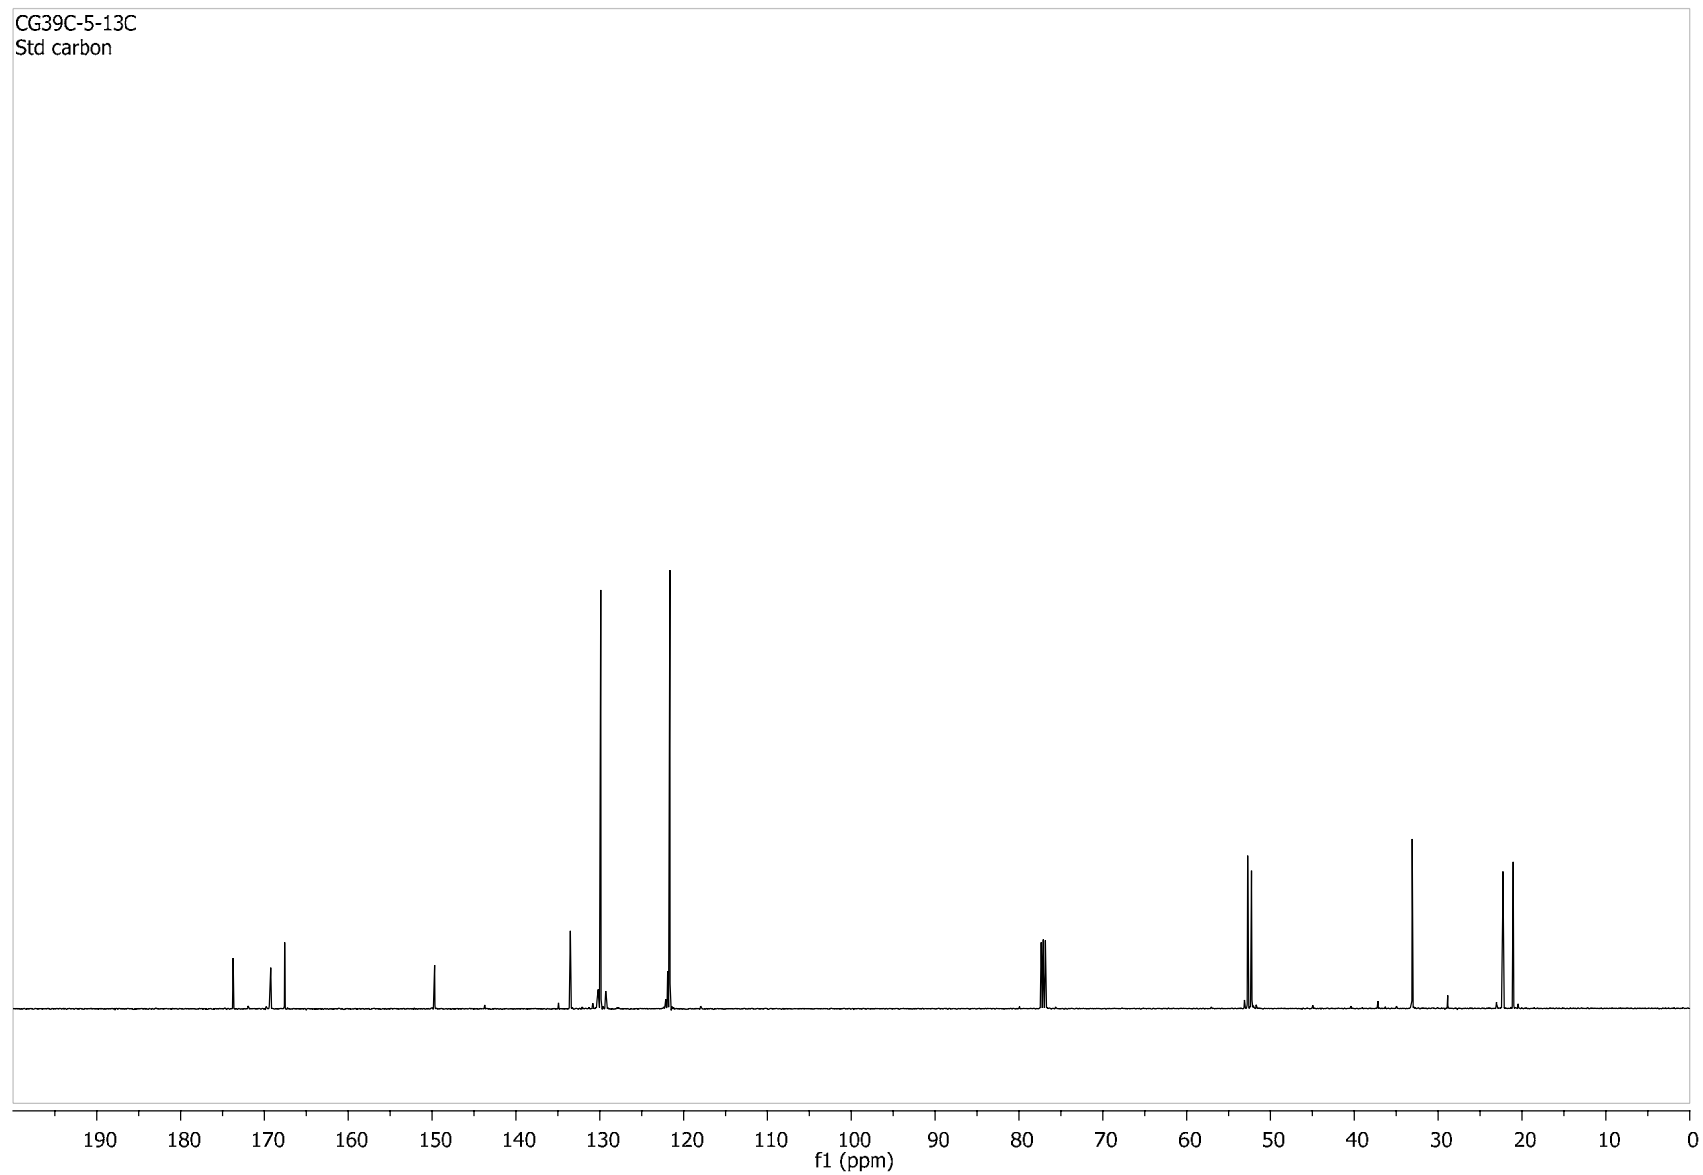

**11a**

<sup>1</sup>H NMR:

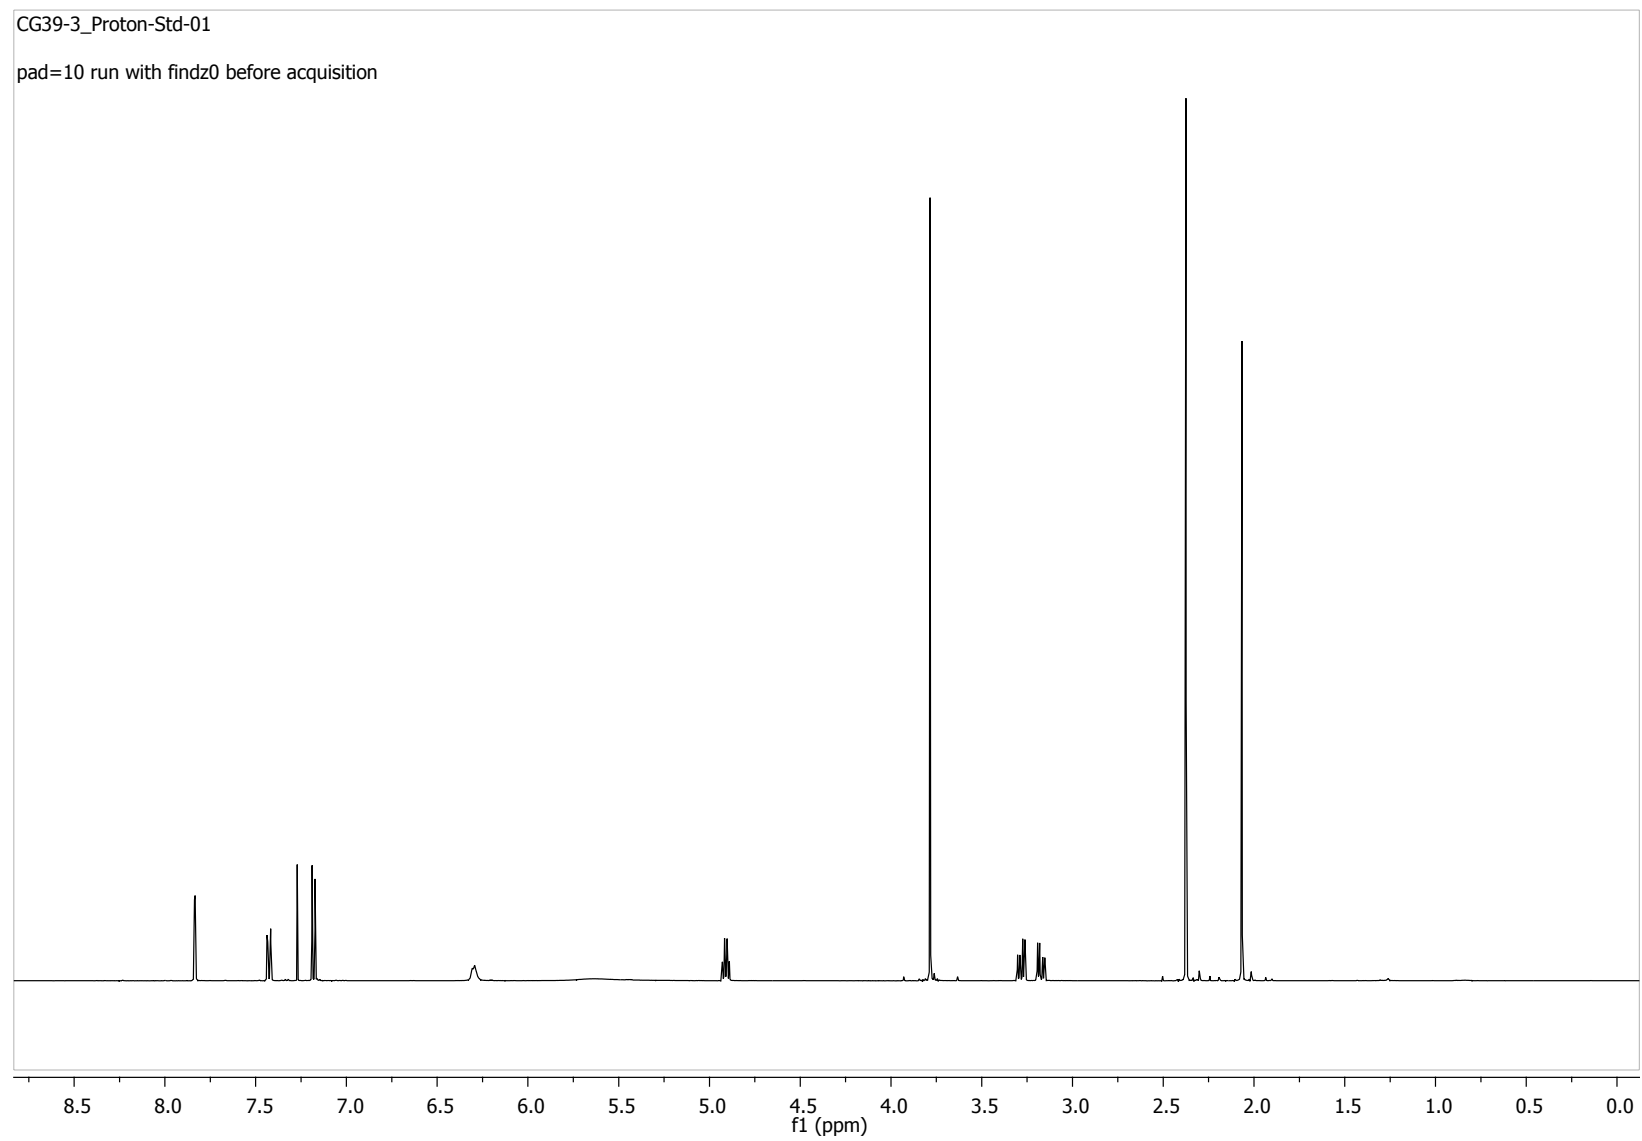

**11a**  
<sup>13</sup>C NMR:

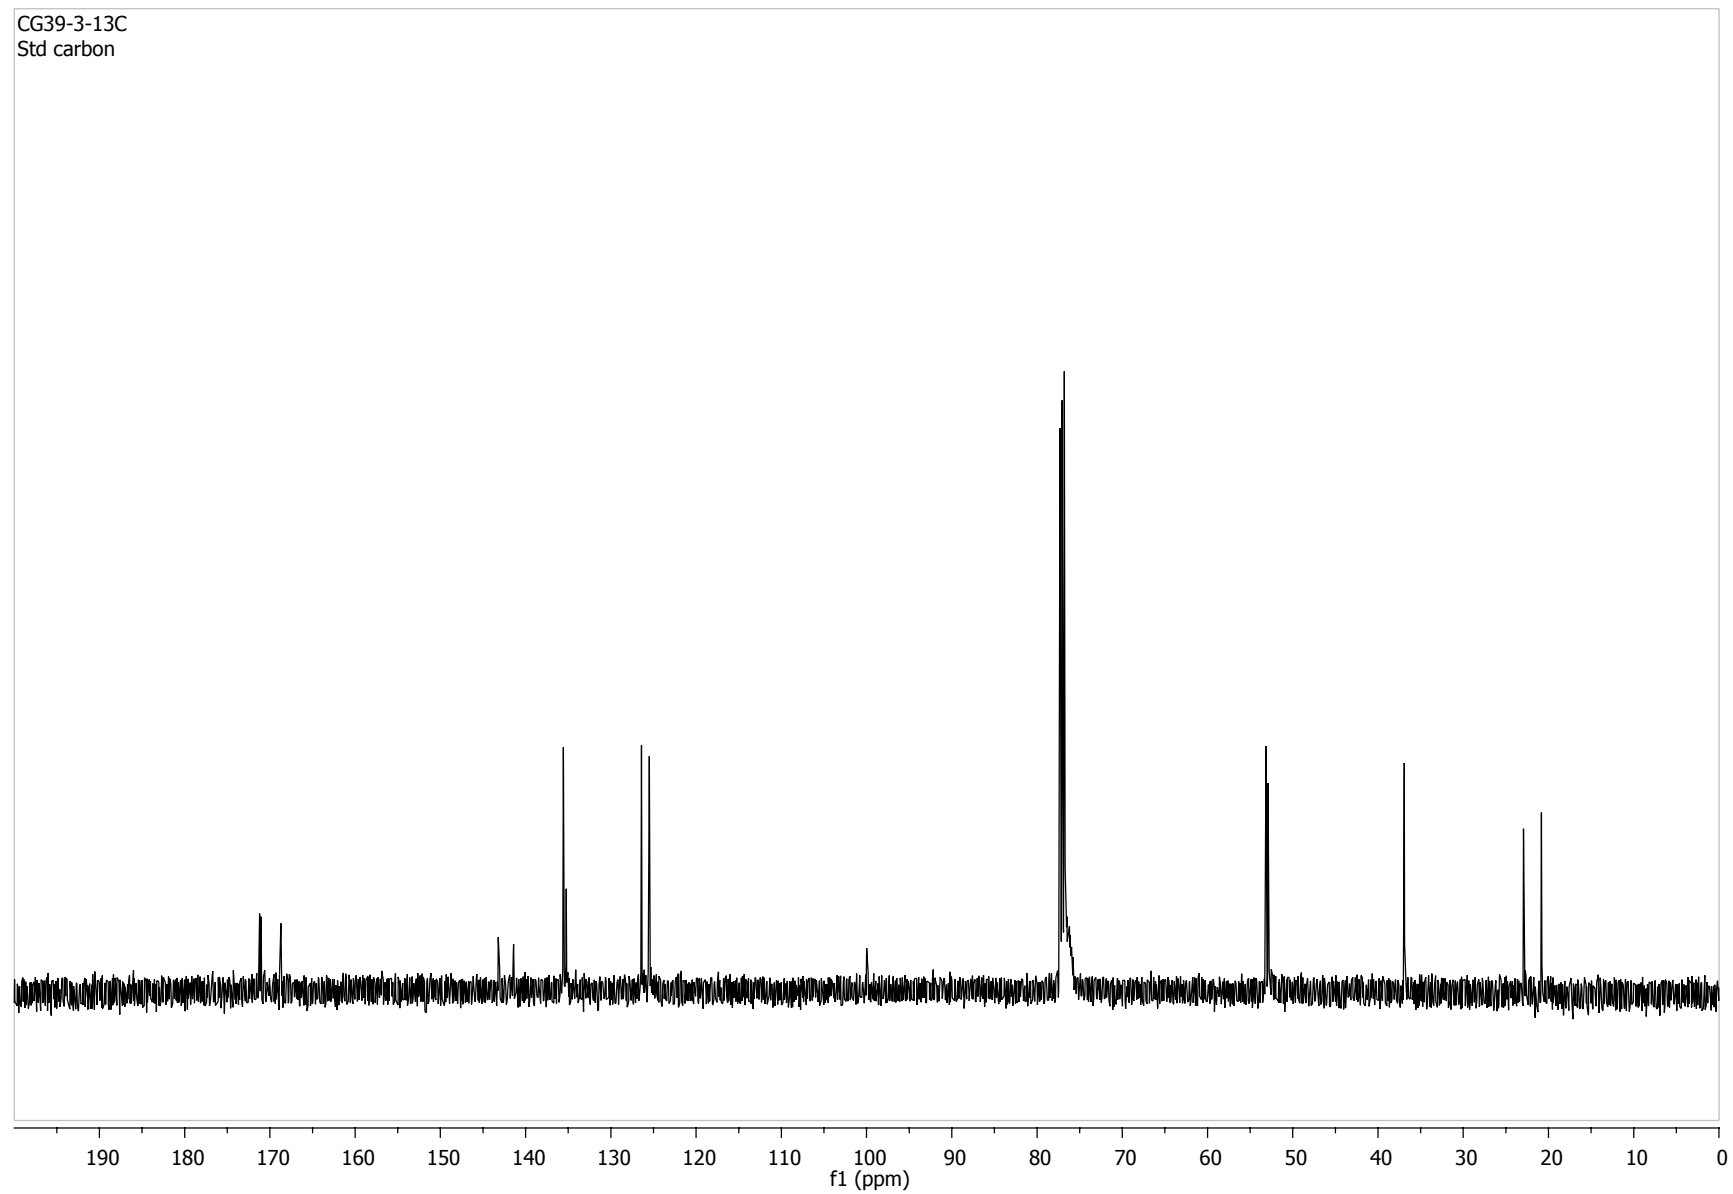

11a

HPLC:

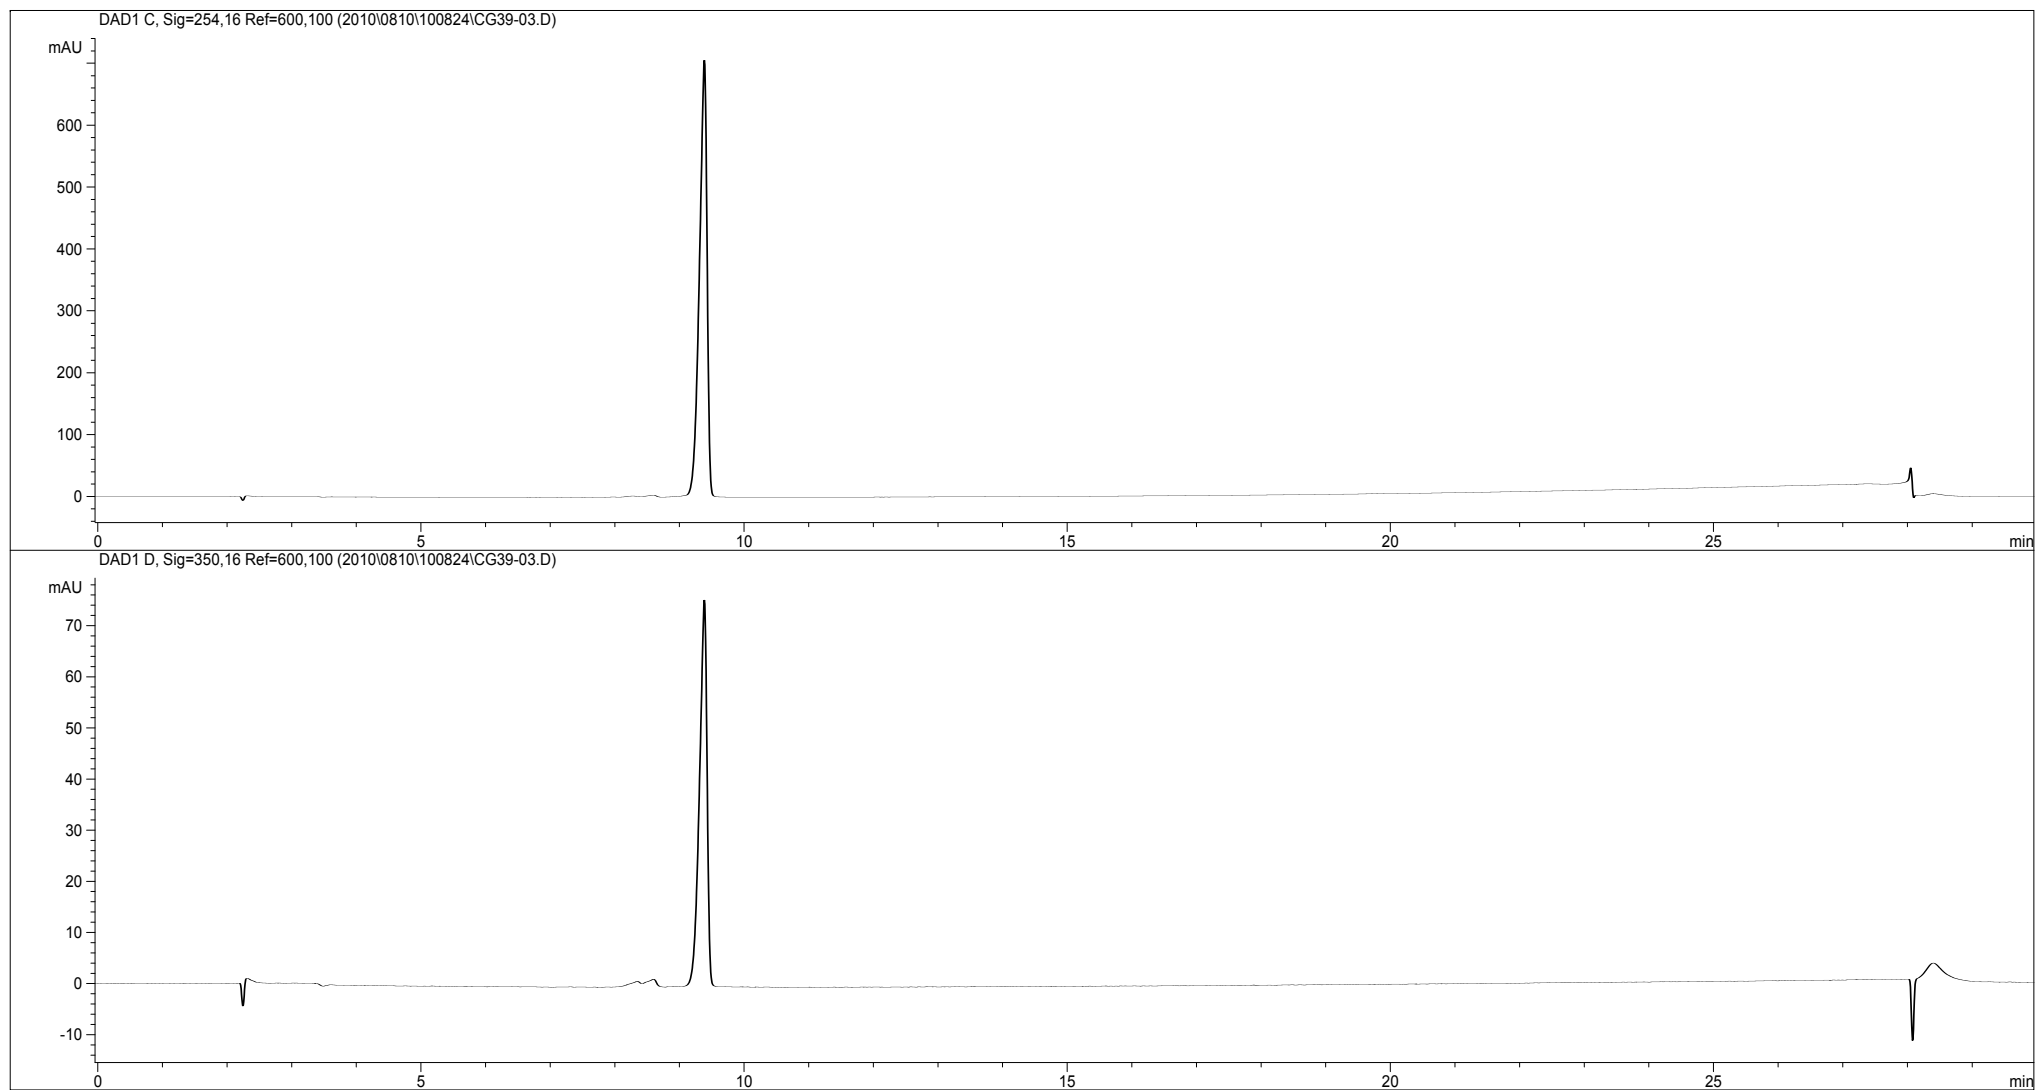

11b

$^1\text{H}$  NMR:

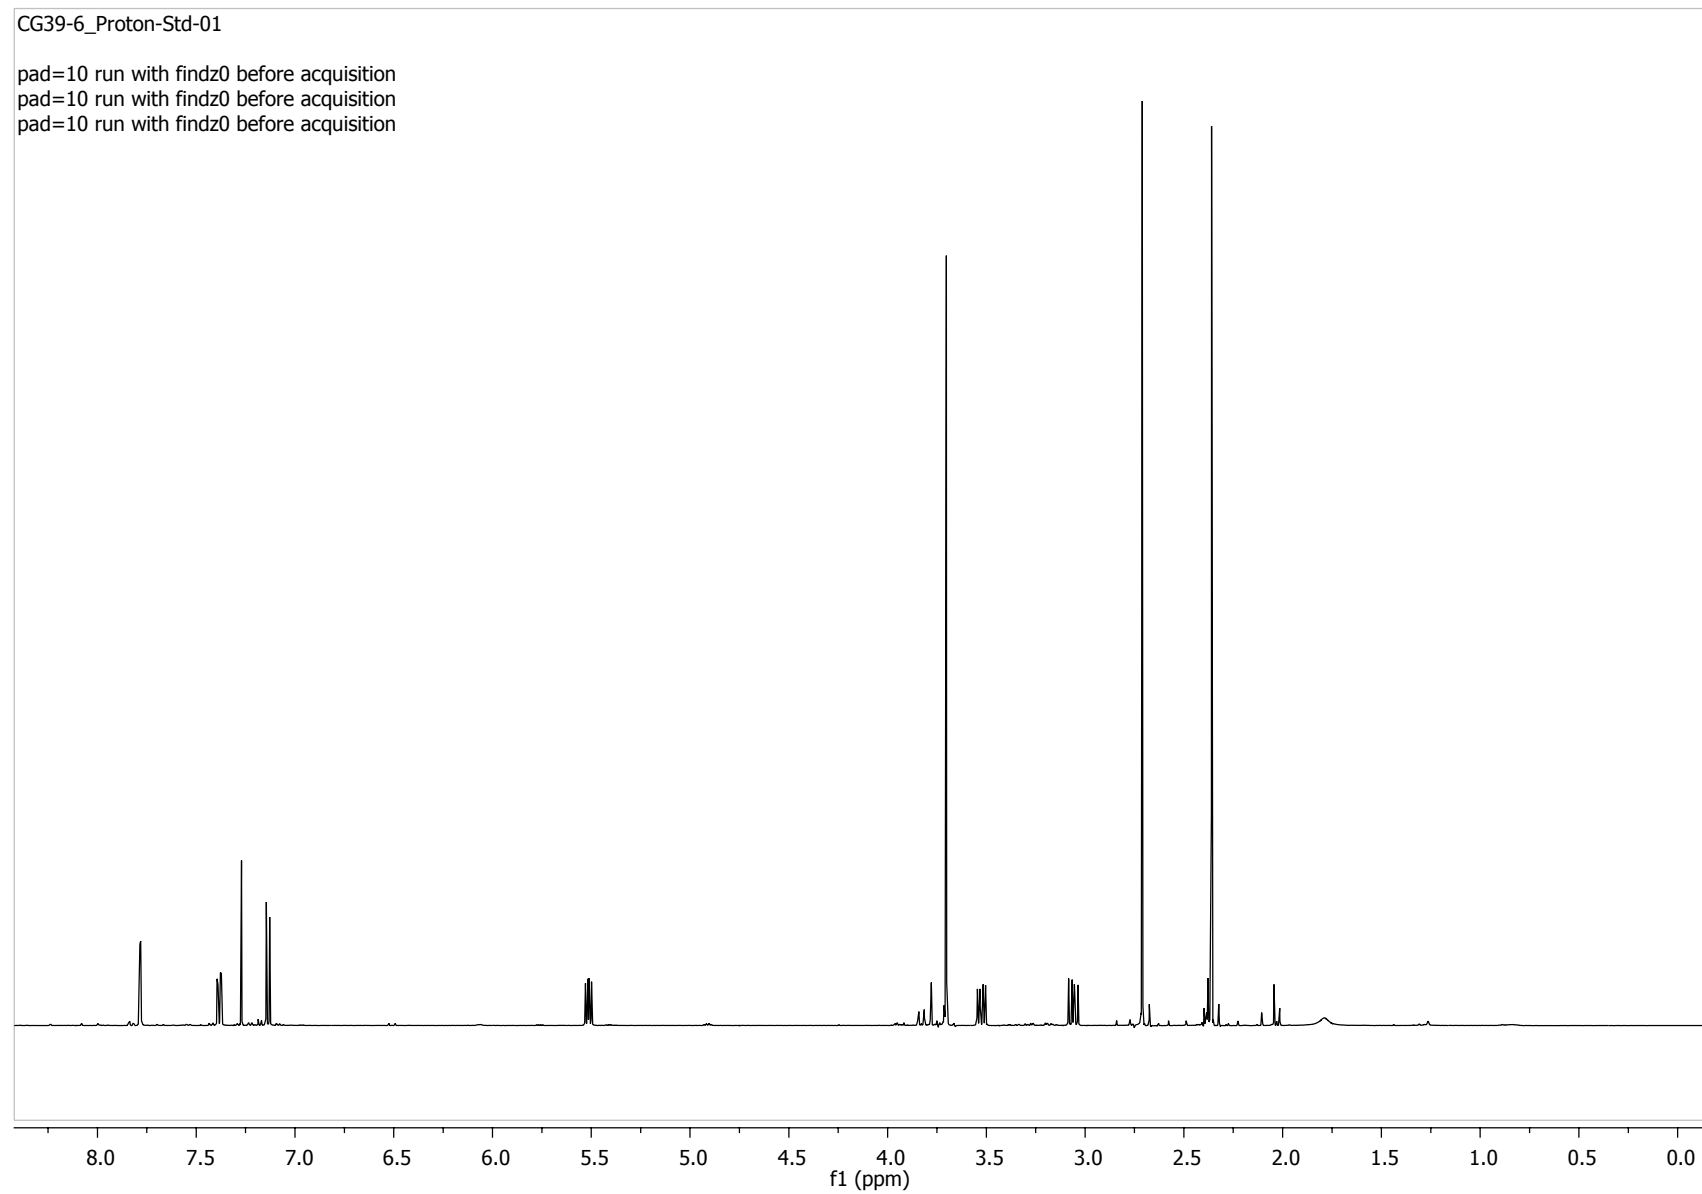

Supplementary Material (ESI) for Organic & Biomolecular Chemistry  
This journal is (c) The Royal Society of Chemistry 2011

**11b**

<sup>13</sup>C NMR:

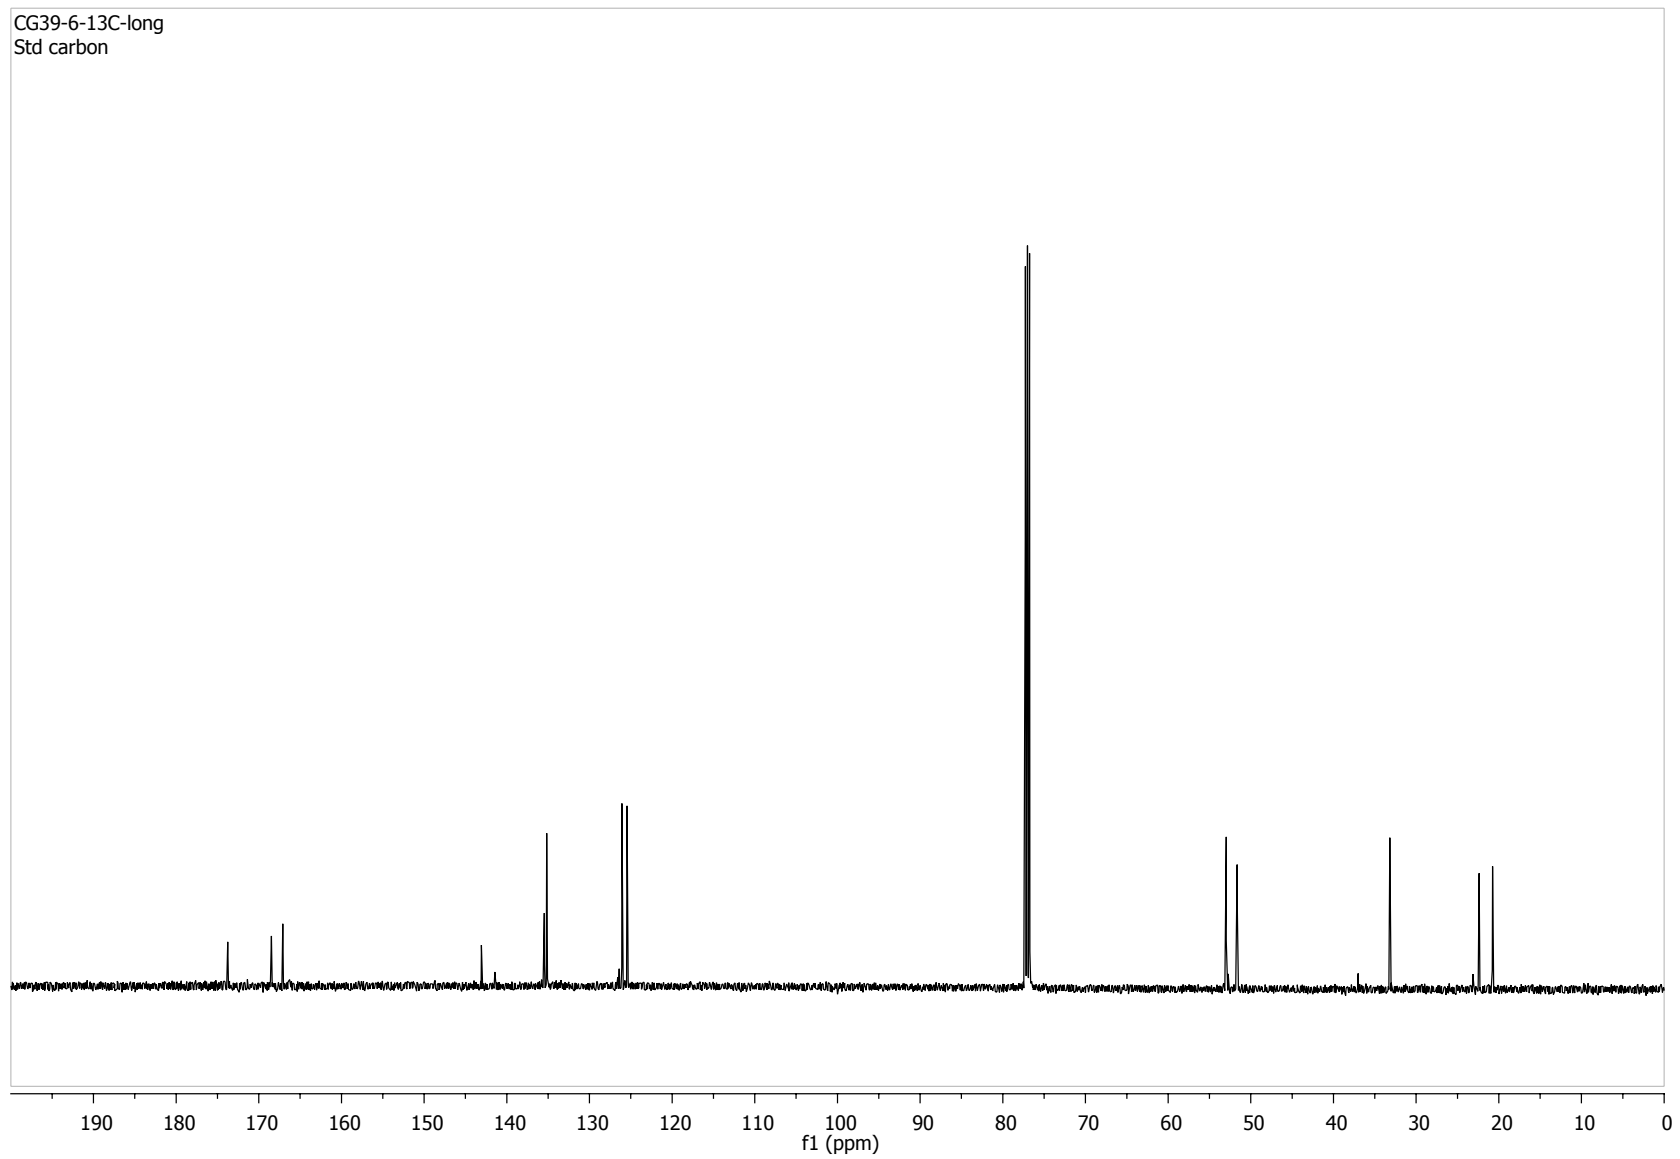

**11b**  
HPLC:



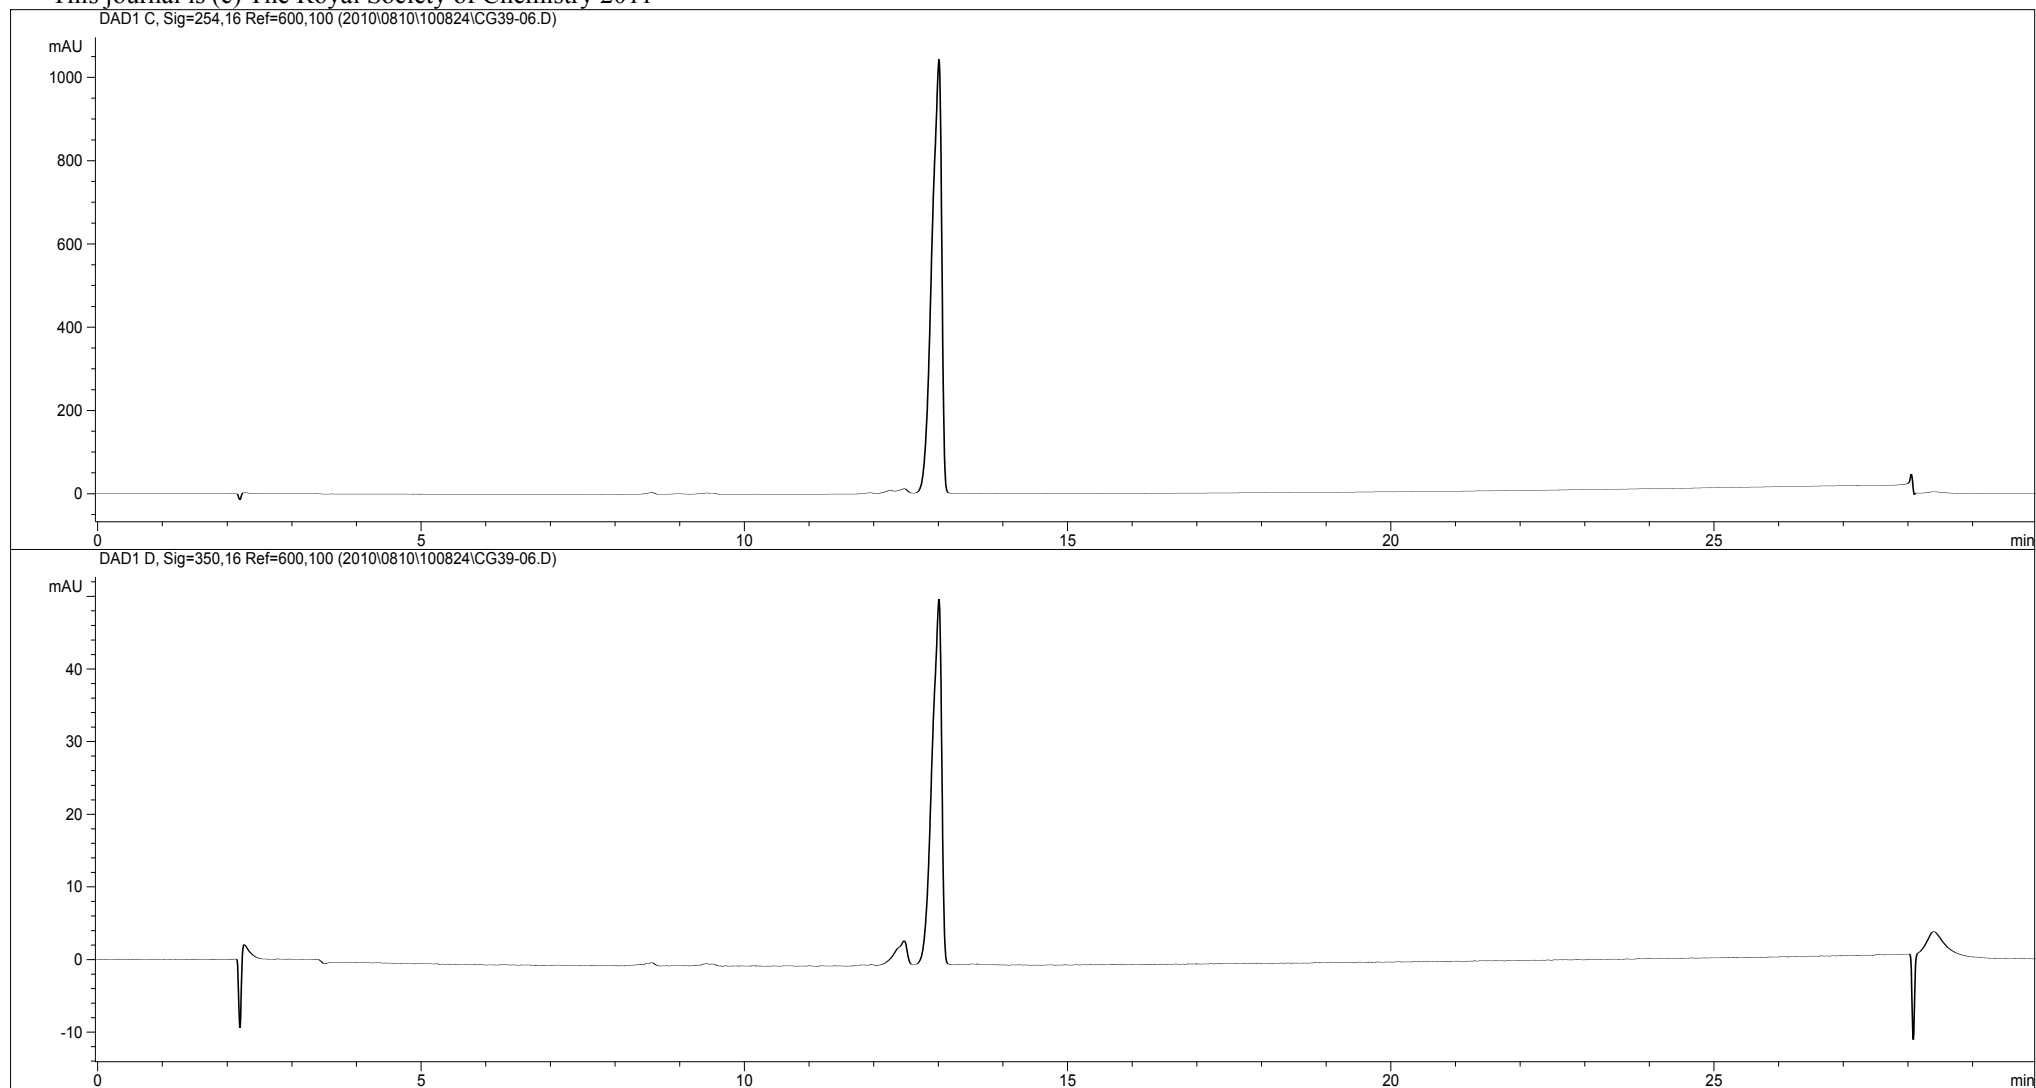

### 1.2.5 Reaction of tryptophan 5 with NO<sub>3</sub><sup>•</sup>

**12a**; (2S,3aR,8aR)-1-Acetyl-3a,5-dinitro-1,2,3,3a,8,8a-hexahydro-pyrrolo[2,3-b]indole-2-carboxylic acid methyl ester

<sup>1</sup>H-NMR (500 MHz, CDCl<sub>3</sub>): δ = 8.22 (m, 2 H, 4,6-*H*), 6.68 (d, *J* = 8.7 Hz, 1 H, 7-*H*), 6.51 (s, 1 H, 8a-*H*), 4.59 (dd, *J* = 9.1, 2.0 Hz, 1 H, 2-*H*), 2.96 (s, 3 H, COOCH<sub>3</sub>), 3.66 (dd, *J* = 15.1, 2.1 Hz, 1 H, 3-*H*), 2.94 (dd, *J* = 15.1, 9.1 Hz, 1 H, 3-*H*), 2.06 ppm (s, 3 H, NHCOCH<sub>3</sub>).

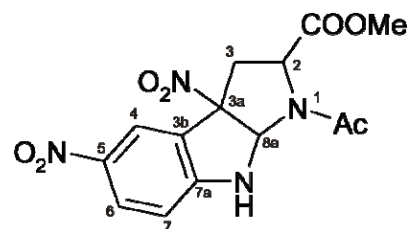

HR-MS: C<sub>14</sub>H<sub>14</sub>N<sub>4</sub>O<sub>7</sub>-H: calcd 349.07897, found 349.07852.  
C<sub>13</sub><sup>13</sup>CH<sub>14</sub>N<sub>4</sub>O<sub>7</sub>-H: calcd 350.08233, found 350.08194.

**12b**; (2S)-1-Acetyl-3a,5-dinitro-1,2,3,3a,8,8a-hexahydro-pyrrolo[2,3-b]indole-2-carboxylic acid methyl ester

<sup>1</sup>H-NMR (500 MHz, CDCl<sub>3</sub>): δ = 8.31 (d, *J* = 2.3 Hz, 1 H, 4-*H*), 8.21 (dd, *J* = 8.9, 2.3 Hz, 1 H, 6-*H*), 6.68 (d, *J* = 8.9 Hz, 1 H, 7-*H*), 6.37 (s, 1 H, 8a-*H*), 4.75 (dd, *J* = 8.3, 1.3 Hz, 1 H, 2-*H*), 4.38 (s, 3 H, COOCH<sub>3</sub>), 3.37 (qd, *J* = 13.3, 4.7 Hz, 3-*H*), 2.09 ppm (s, 3 H, NHCOCH<sub>3</sub>).

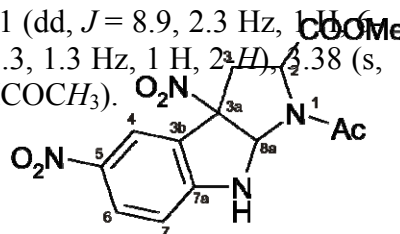

<sup>13</sup>C-NMR (125 MHz, CDCl<sub>3</sub>): δ = 171.4 (C<sub>q</sub>, NHCOCH<sub>3</sub>), 169.4 (C<sub>q</sub>, COOCH<sub>3</sub>), 155.6 (C<sub>q</sub>, C-7a), 140.3 (C<sub>q</sub>, C-5), 130.1 (C<sub>t</sub>, C-6), 122.8 (C<sub>t</sub>, C-4), 121.2 (C<sub>q</sub>, C-3b), 108.9 (C<sub>t</sub>, C-7), 96.3 (C<sub>q</sub>, C-3a), 79.7 (C<sub>t</sub>, C-8a), 60.6 (C<sub>t</sub>, C-2), 53.3 (C<sub>p</sub>, C- COOCH<sub>3</sub>), 39.8 (C<sub>s</sub>, C-3), 21.6 ppm (C<sub>p</sub>, C- NHCOCH<sub>3</sub>).

HR-MS: C<sub>14</sub>H<sub>14</sub>N<sub>4</sub>O<sub>7</sub>+H: calcd 351.09353, found 351.09348.  
C<sub>13</sub><sup>13</sup>CH<sub>14</sub>N<sub>4</sub>O<sub>7</sub>+H: calcd 352.09688, found 352.09692.

**13**; (2S)-1-Acetyl-3a-hydroxy-5-nitro-1,2,3,3a,8,8a-hexahydro-pyrrolo[2,3-b]indole-2-carboxylic acid methyl ester

<sup>1</sup>H-NMR (500 MHz, CDCl<sub>3</sub>): δ = 8.15 (d, *J* = 2.2 Hz, 1 H, 4-*H*), 8.12 (dd, *J* = 8.8, 2.3 Hz, 1 H, 6-*H*), 6.61 (d, *J* = 8.8 Hz, 1 H, 7-*H*), 5.49 (s, 1 H, 8a-*H*), 4.60 (sd, *J* = 8.0, 1.5 Hz, 1 H, 2-*H*), 3.33 (s, 3 H, COOCH<sub>3</sub>), 2.95 (m, 2 H, 3-*H*), 2.03 ppm (s, 3 H, NHCOCH<sub>3</sub>).

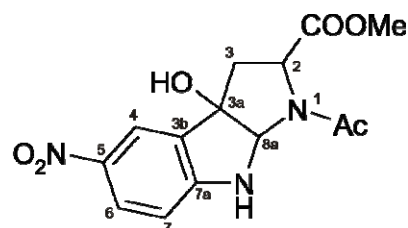

<sup>13</sup>C-NMR (125 MHz, CDCl<sub>3</sub>): δ = 172.6 (C<sub>q</sub>, COOCH<sub>3</sub>), 170.1 (C<sub>q</sub>, NHCOCH<sub>3</sub>), 155.5 (C<sub>q</sub>, C-7a), 139.9 (C<sub>q</sub>, C-5), 128.9 (C<sub>t</sub>, C-6), 128.5 (C<sub>q</sub>, C-3b), 121.3 (C<sub>t</sub>, C-4), 108.4 (C<sub>t</sub>, C-7), 84.5 (C<sub>q</sub>, C-3a), 81.9 (C<sub>t</sub>, C-8a), 60.5 (C<sub>t</sub>, C-2), 53.0 (C<sub>p</sub>, COOCH<sub>3</sub>), 40.6 (C<sub>s</sub>, C-3), 21.4 ppm (C<sub>p</sub>, NHCOCH<sub>3</sub>).

HR-MS: C<sub>14</sub>H<sub>15</sub>N<sub>3</sub>O<sub>6</sub>+H: calcd 322.10336, found 322.10336.  
C<sub>13</sub><sup>13</sup>CH<sub>15</sub>N<sub>3</sub>O<sub>6</sub>+H: calcd 323.10672, found 323.10672.

**14**; *N*<sub>a</sub>-Formyl-*N*<sub>b</sub>-acetylkynurenine methyl ester (from the reaction of **5** with O<sub>3</sub>)

<sup>1</sup>H-NMR (500 MHz, CDCl<sub>3</sub>): δ = 11.37 (s, 1 H, CHO), 8.76 (d, *J* = 8.4 Hz, 1 H, 3-*H*), 8.49 (s, 1 H, *N*<sub>a</sub>*H*), 7.91 (dd, *J* = 8.1, 1.5 Hz, 1 H, 6-*H*), 7.60 (t, *J* = 7.8 Hz, 1 H, 5-*H*), 7.18 (t, *J* = 7.6 Hz, 1 H, 4-*H*), 6.51 (d, *J* = 7.0 Hz, 1 H, *N*<sub>b</sub>*H*), 4.96 (dt, *J* = 7.7, 4.0 Hz, 1 H, CH), 3.82-3.69 (m, 2 H, CH<sub>2</sub>), 3.77 (s, 3 H, COOCH<sub>3</sub>), 2.03 ppm (s, 3 H, NHCOCH<sub>3</sub>).\*

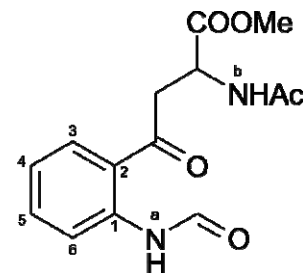

HR-MS: C<sub>14</sub>H<sub>16</sub>N<sub>2</sub>O<sub>5</sub>+H: calcd 293.1138, found 293.1142.  
C<sub>13</sub><sup>13</sup>CH<sub>16</sub>N<sub>2</sub>O<sub>5</sub>+H: calcd 294.1171, found 294.1168.

\* Data in accordance with literature: X. Fang, F. Jin, H. Jin, and C. v. Sonntag, *J. Chem. Soc., Perkin Trans. 2*, 1998, 259.

**12a**

<sup>1</sup>H NMR:

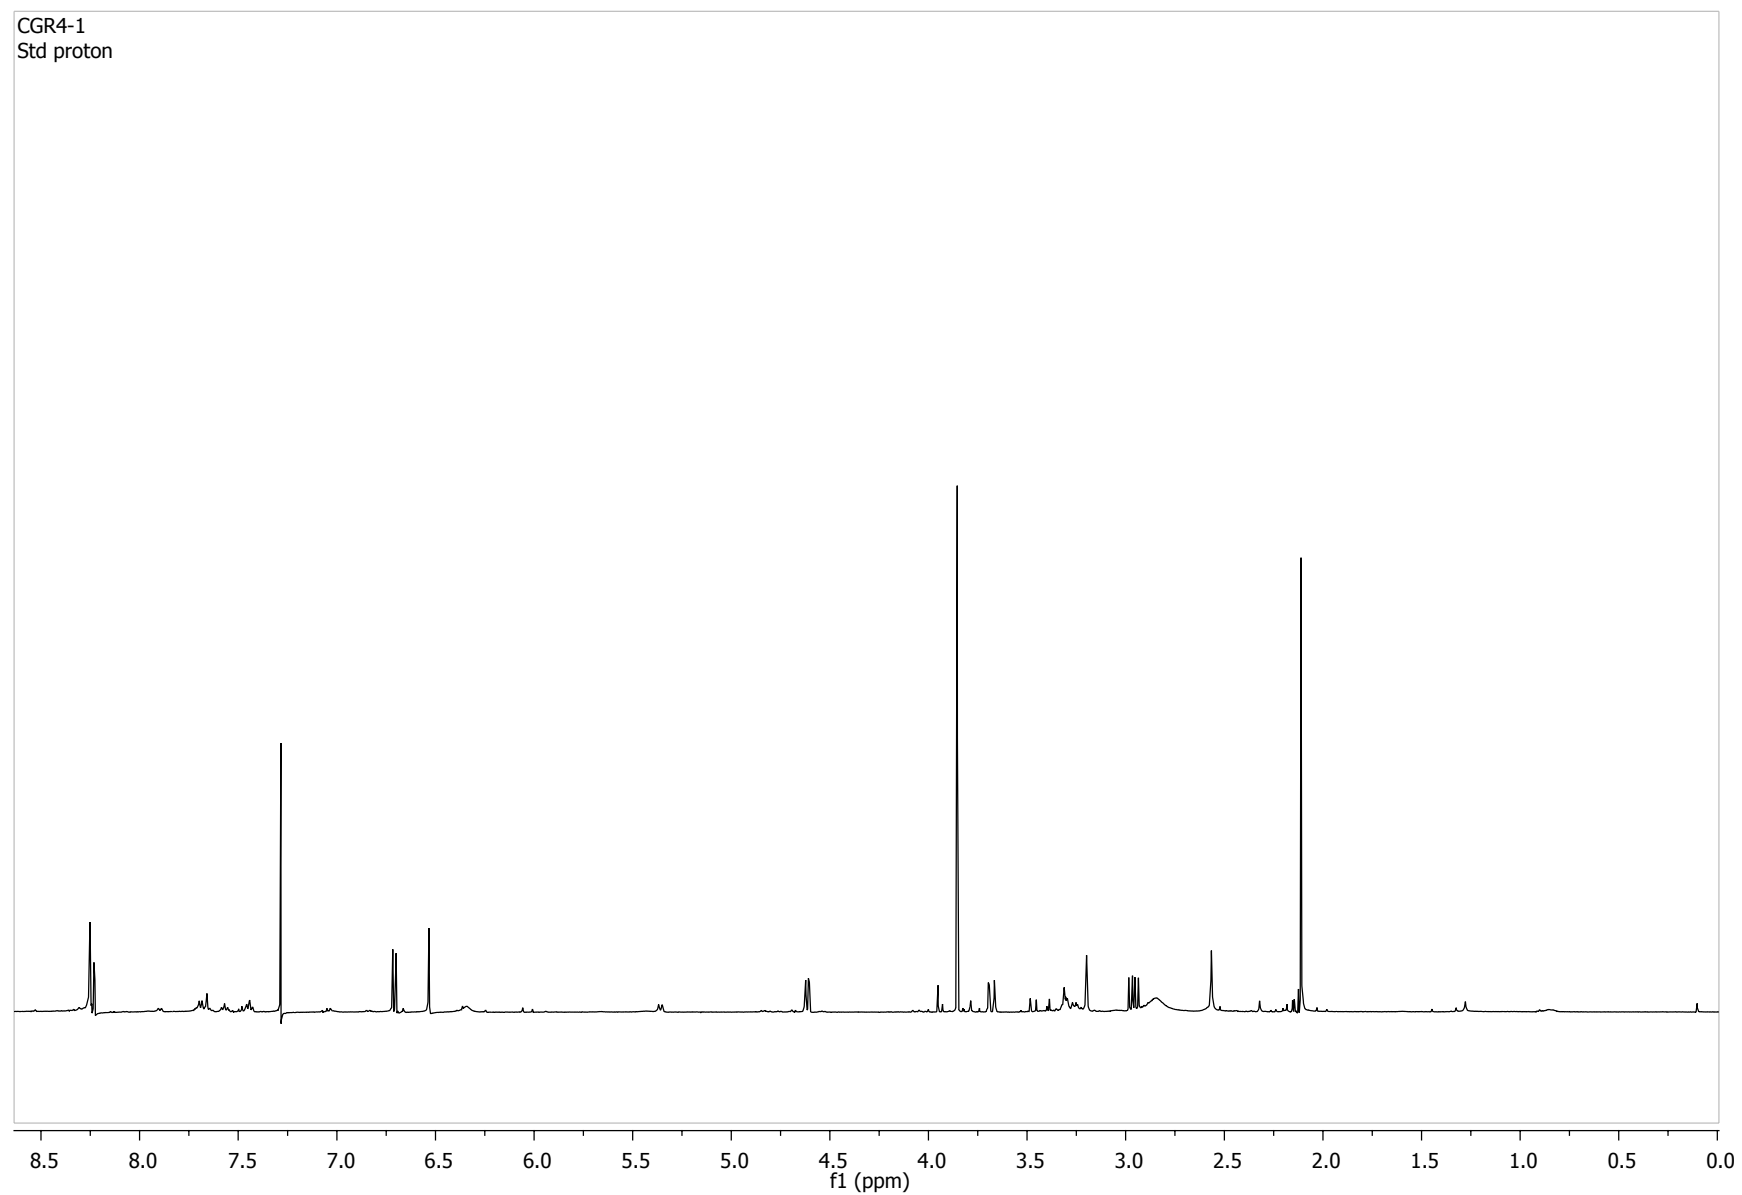



**12a**

HPLC:

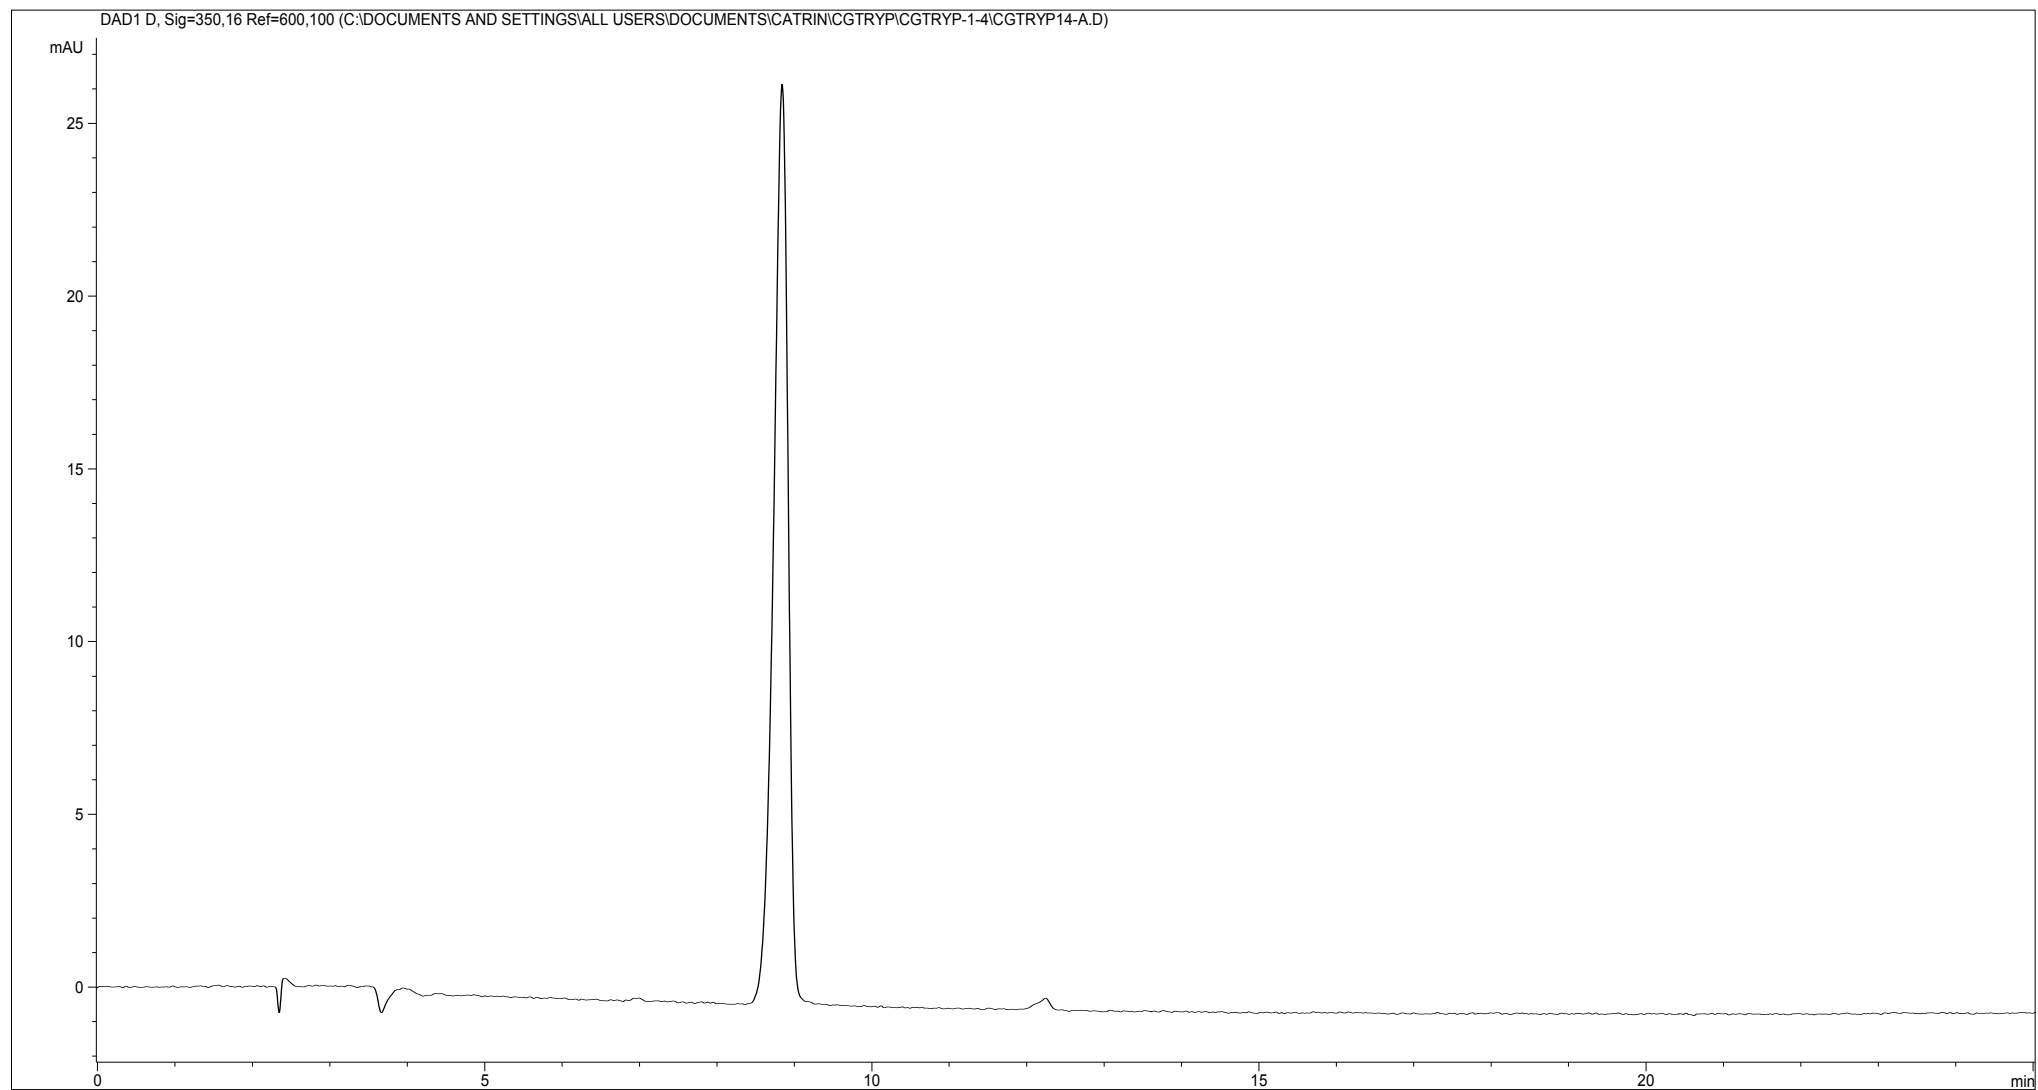

**12b**

$^1\text{H}$  NMR:

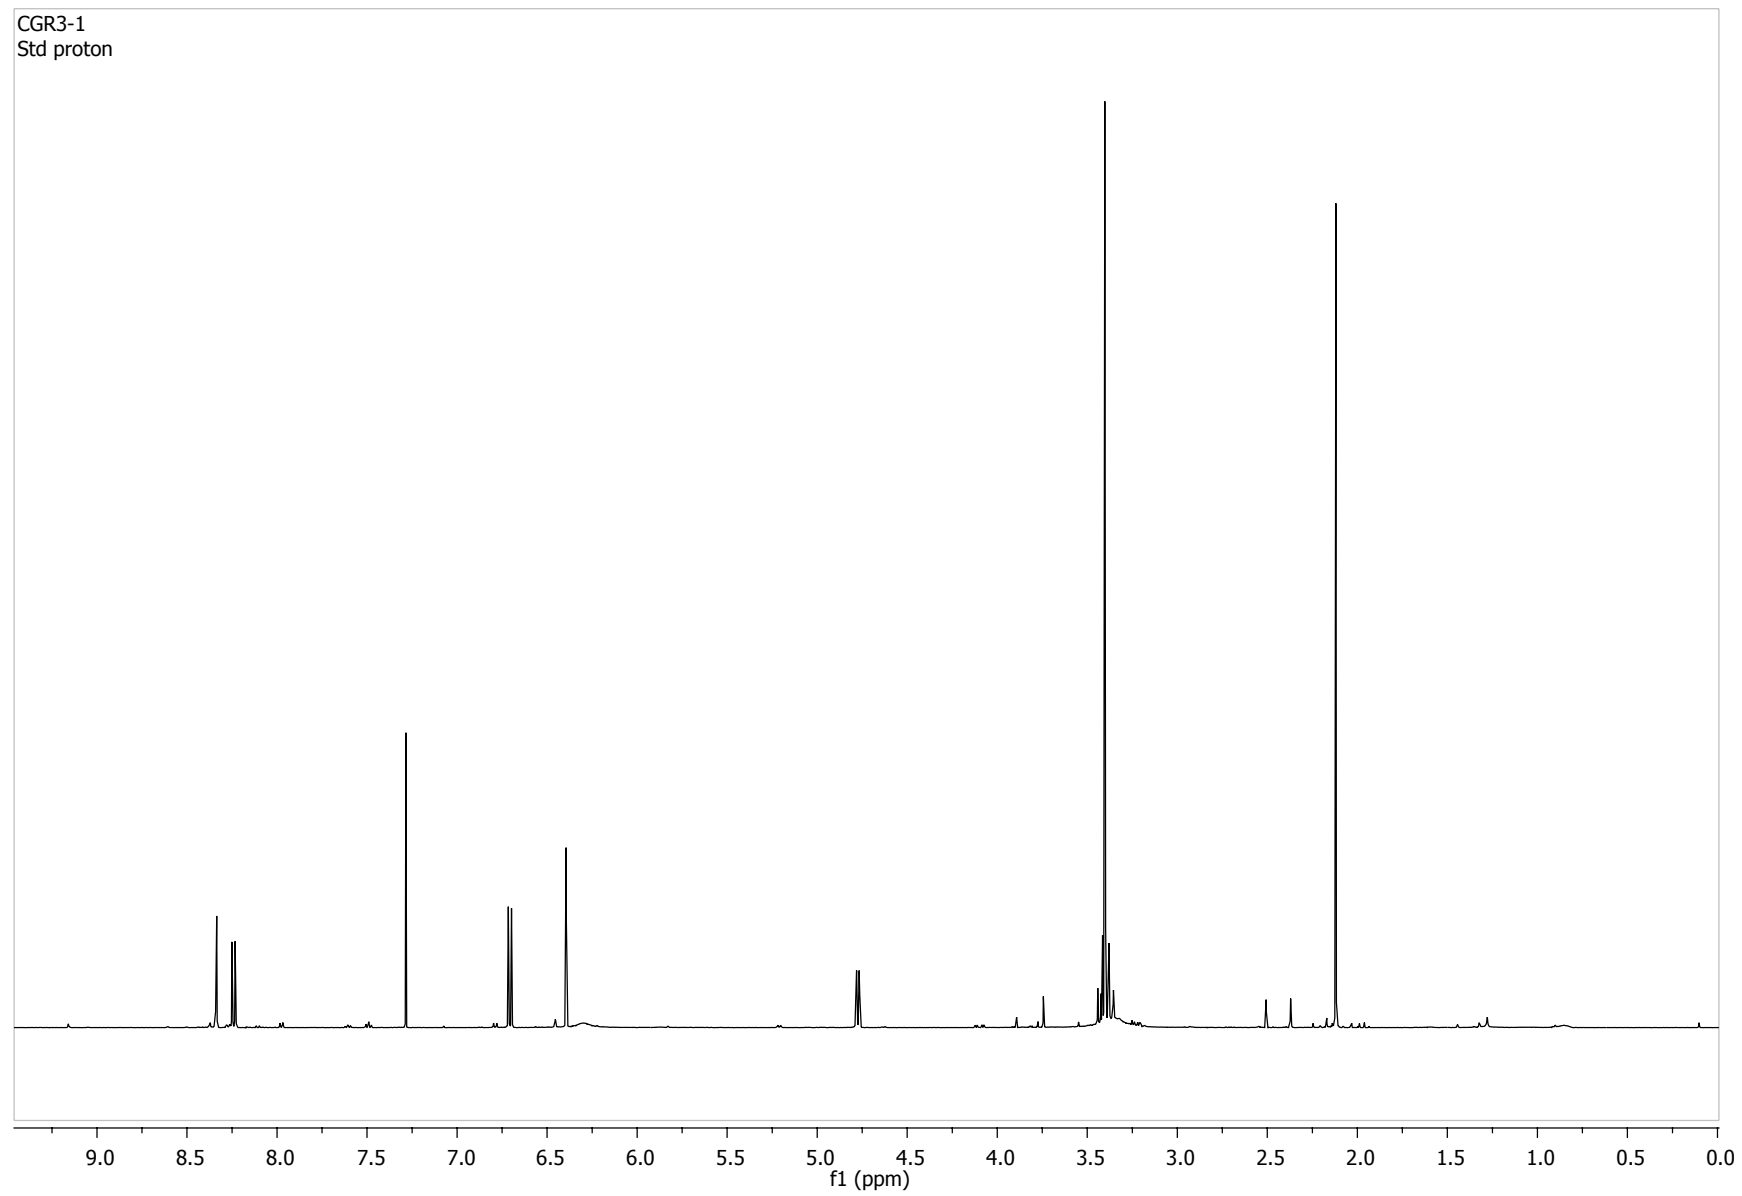



**12b**

<sup>13</sup>C NMR:

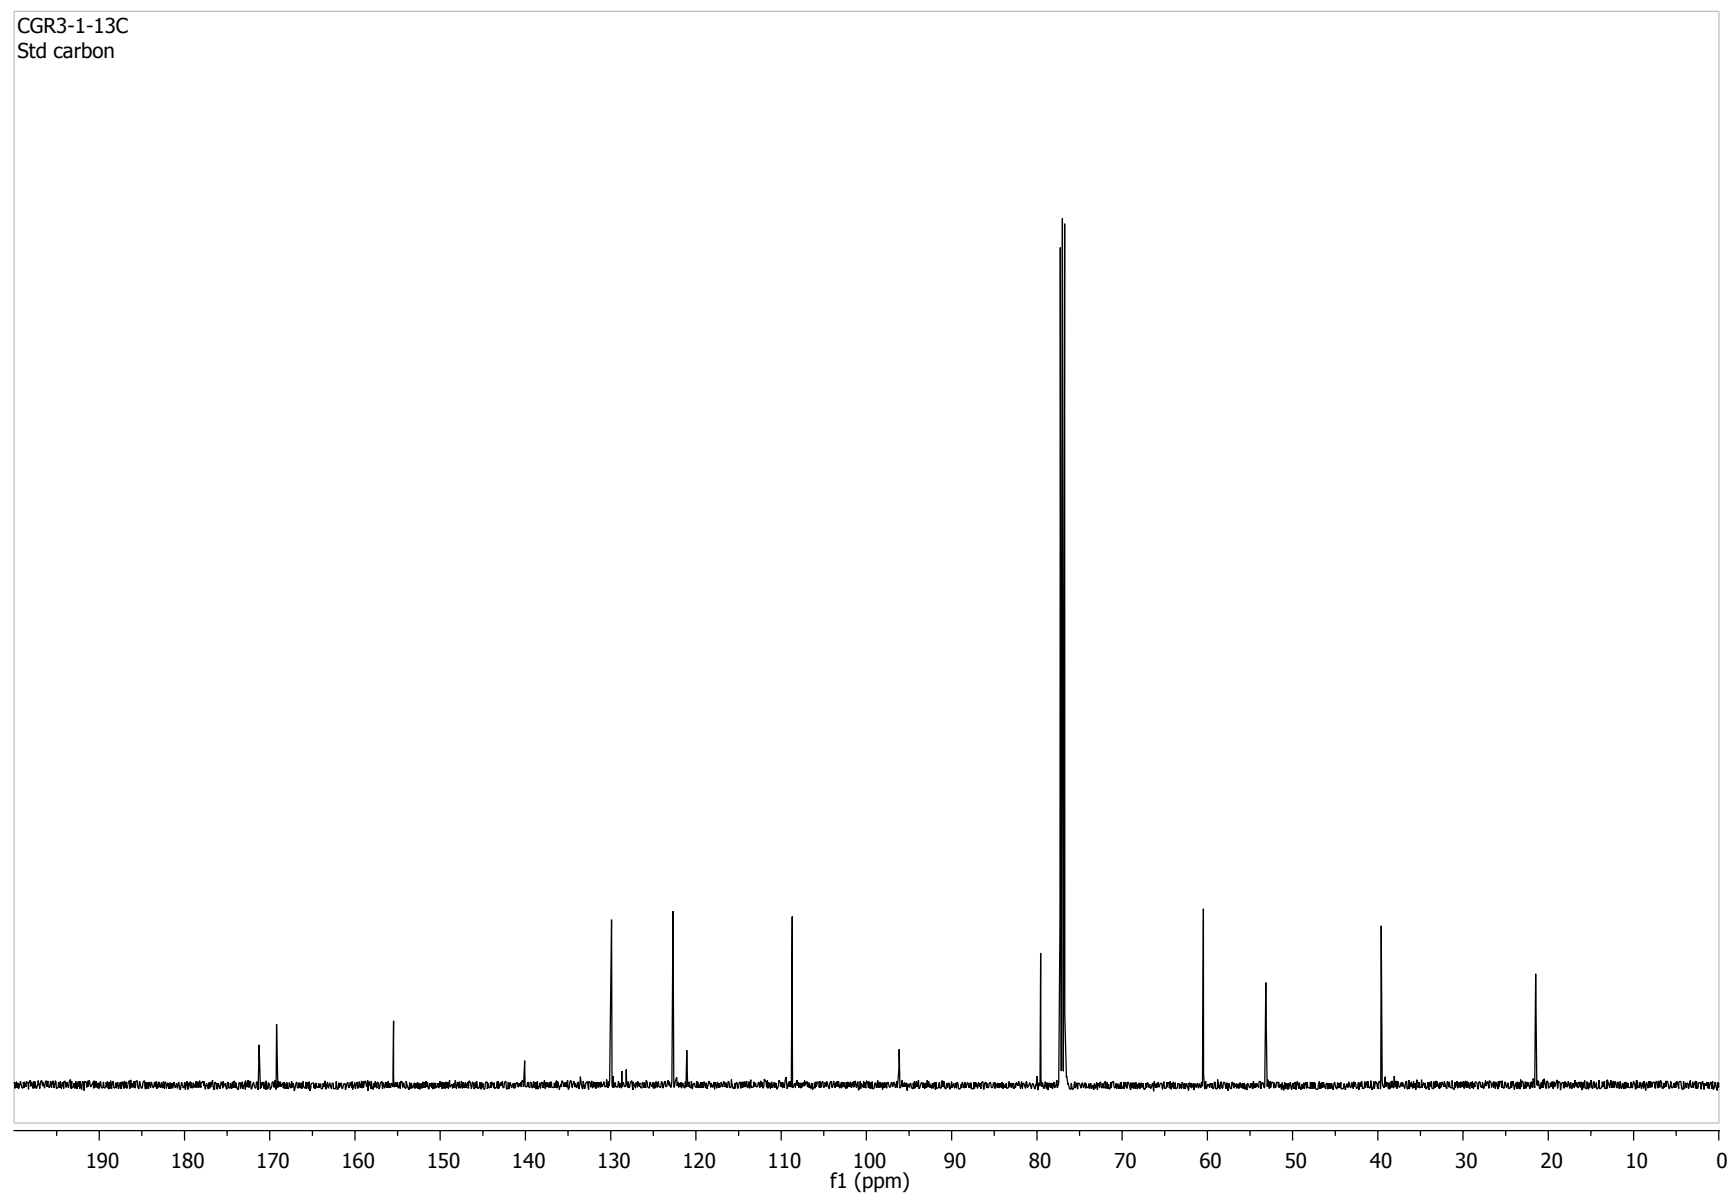



**12b**

HPLC:

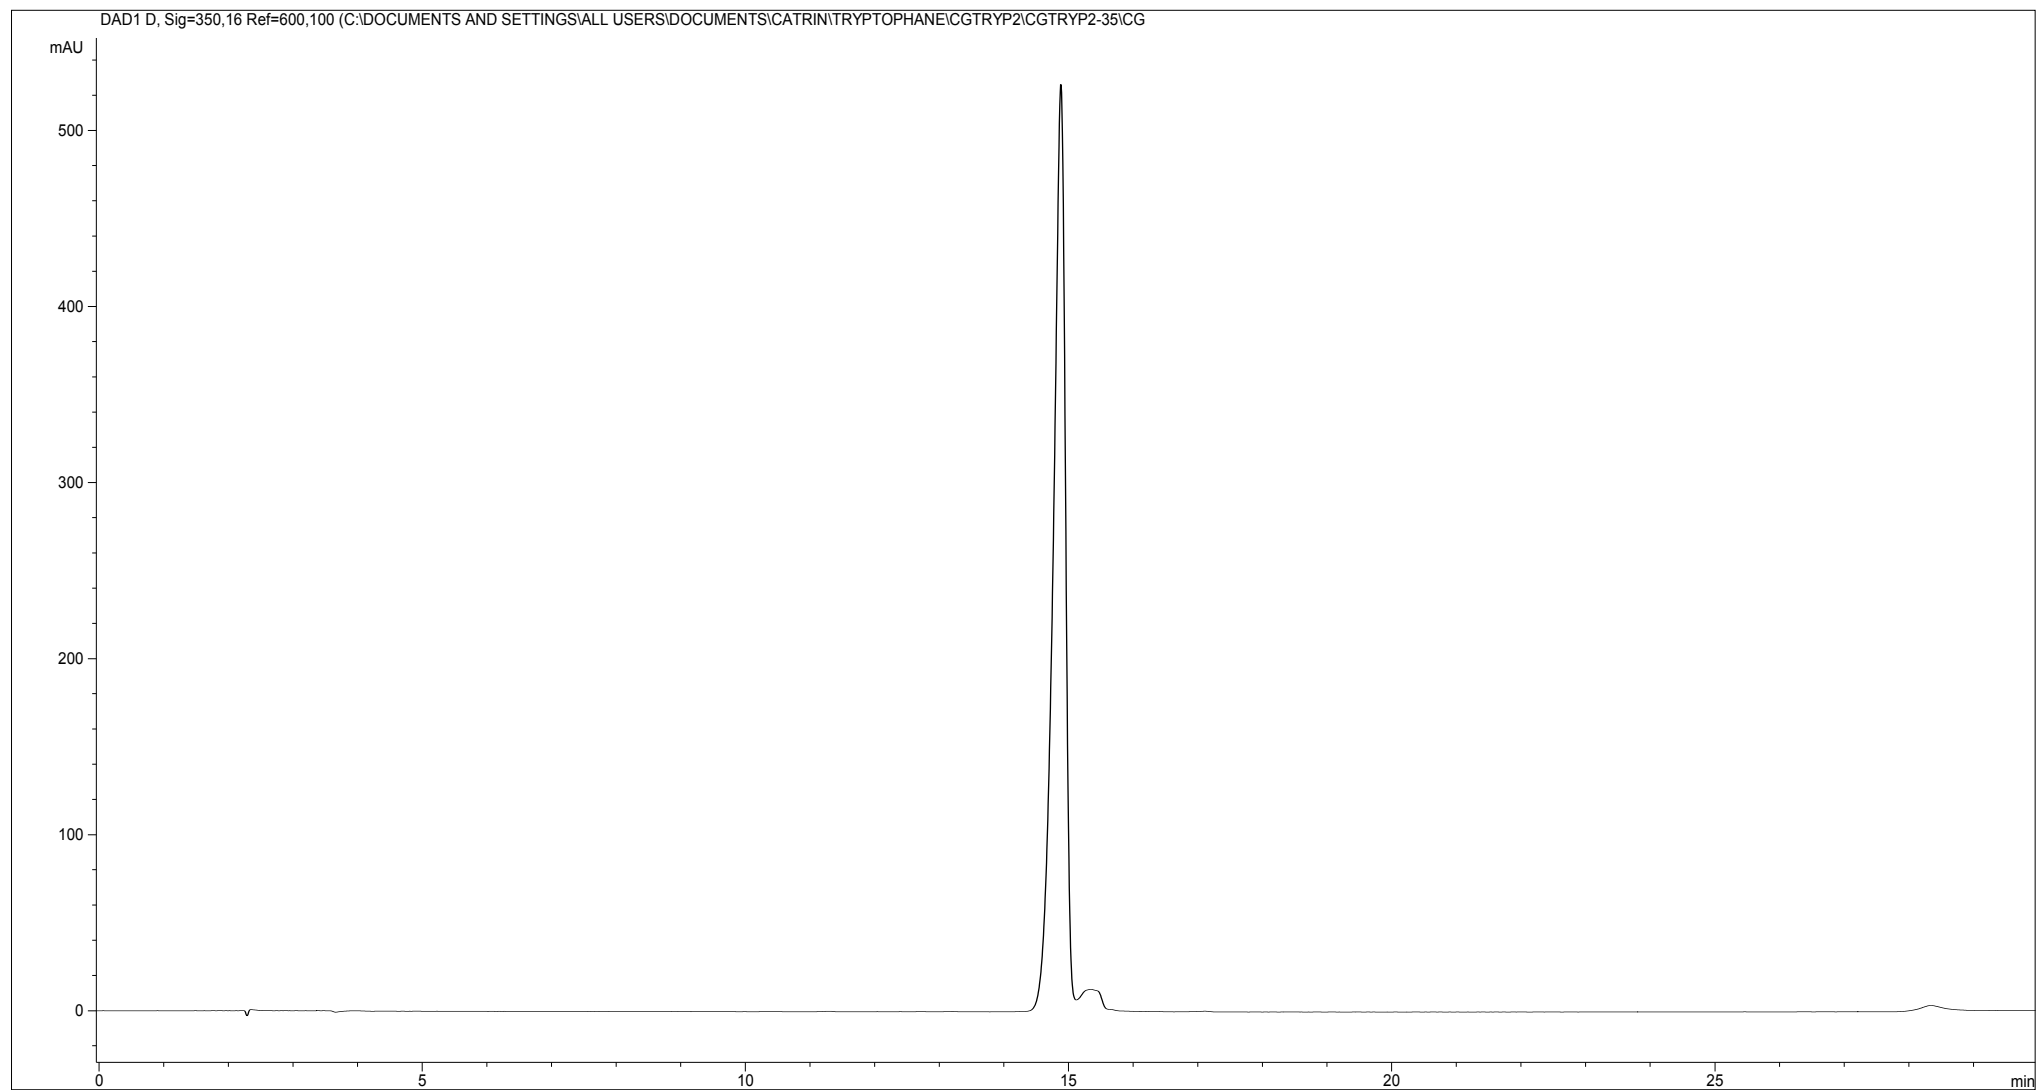

**13**

<sup>1</sup>H NMR:

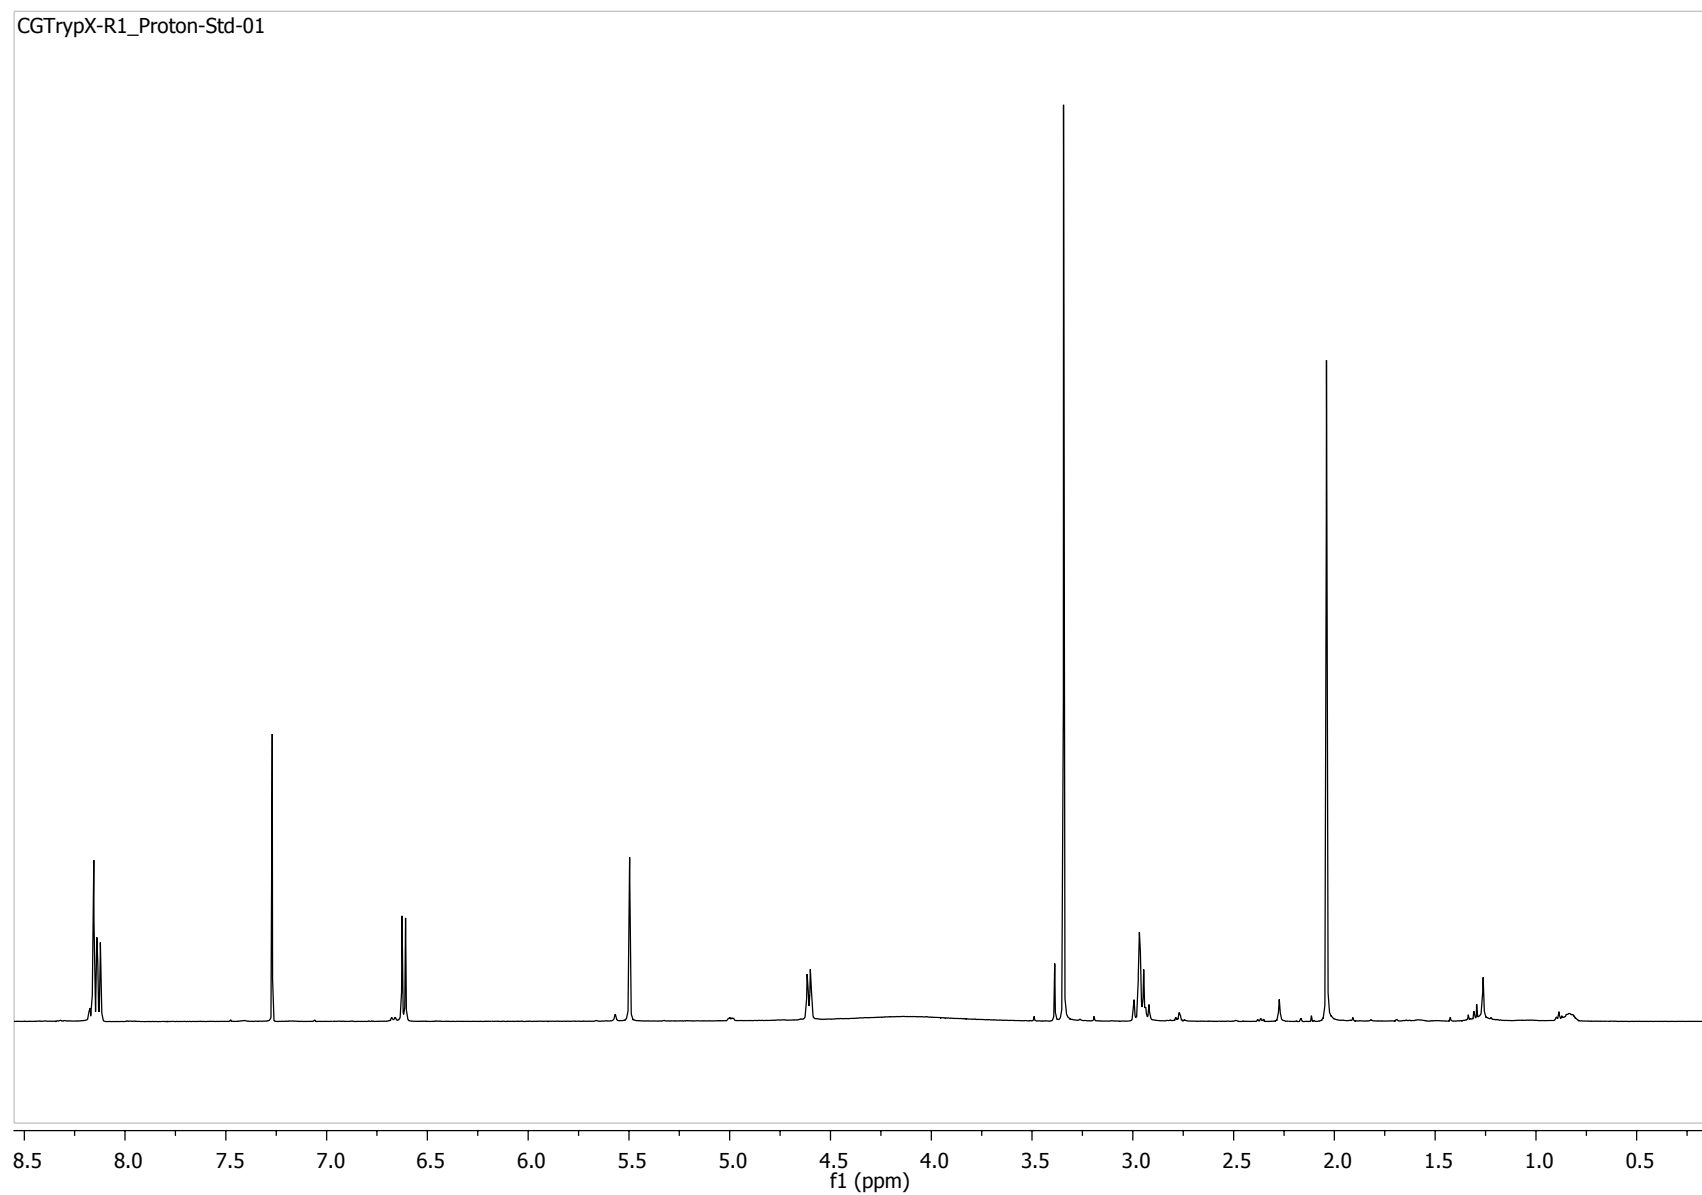



**13**

<sup>13</sup>C NMR:

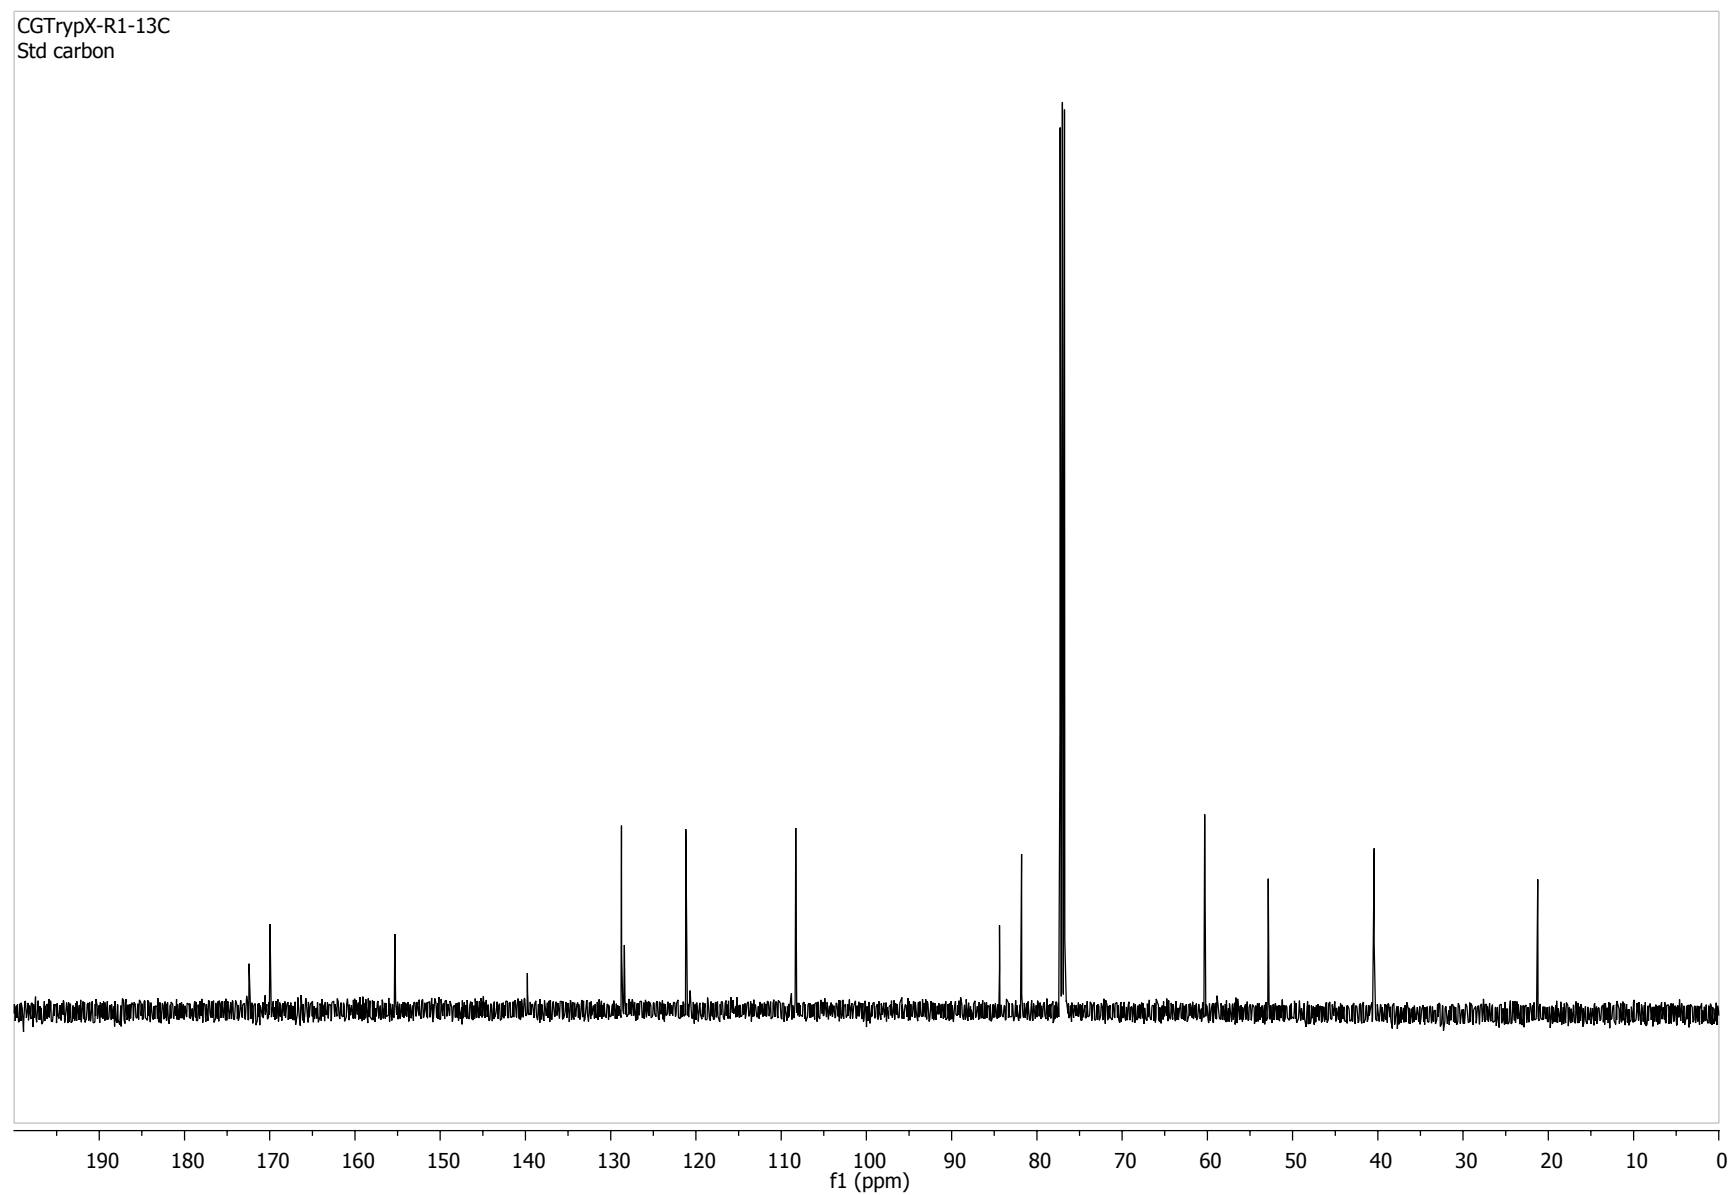



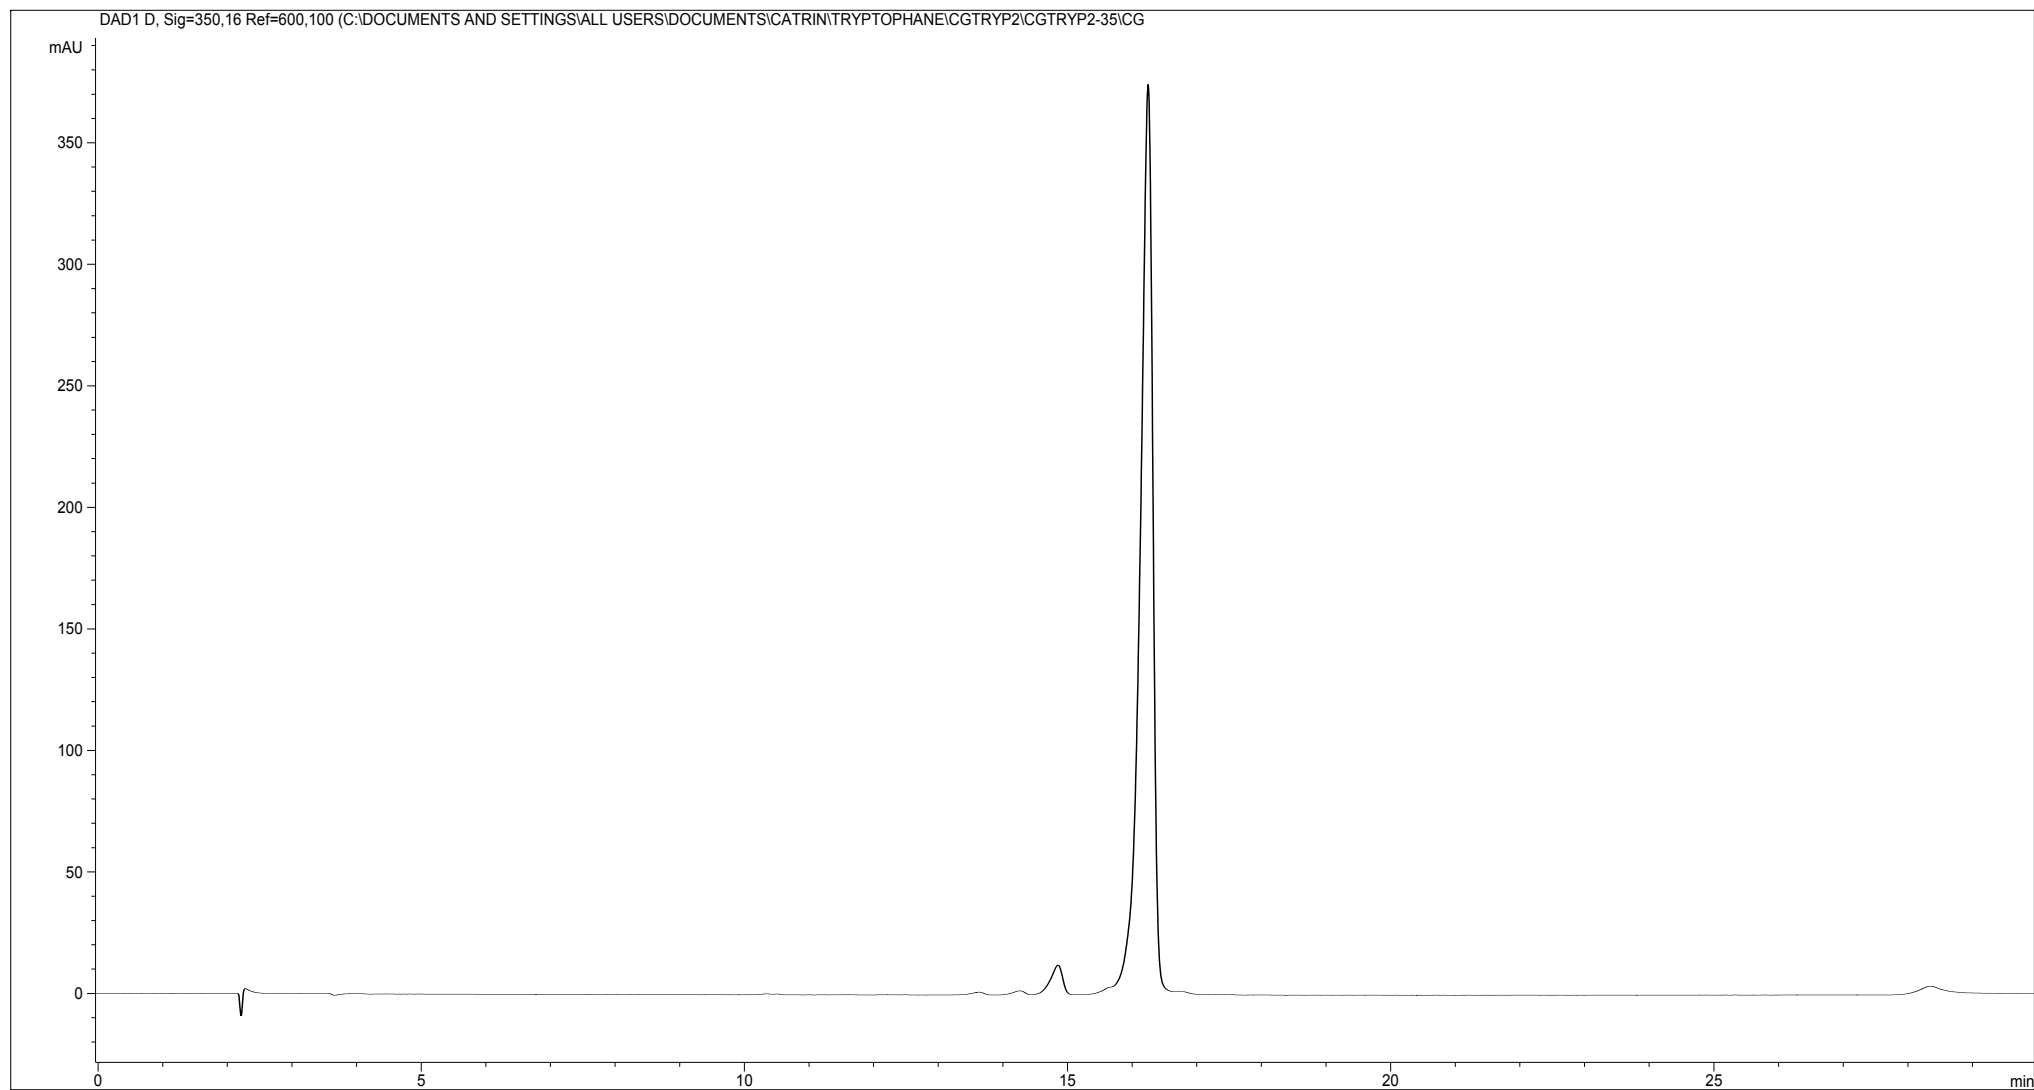



$^1\text{H}$  NMR:

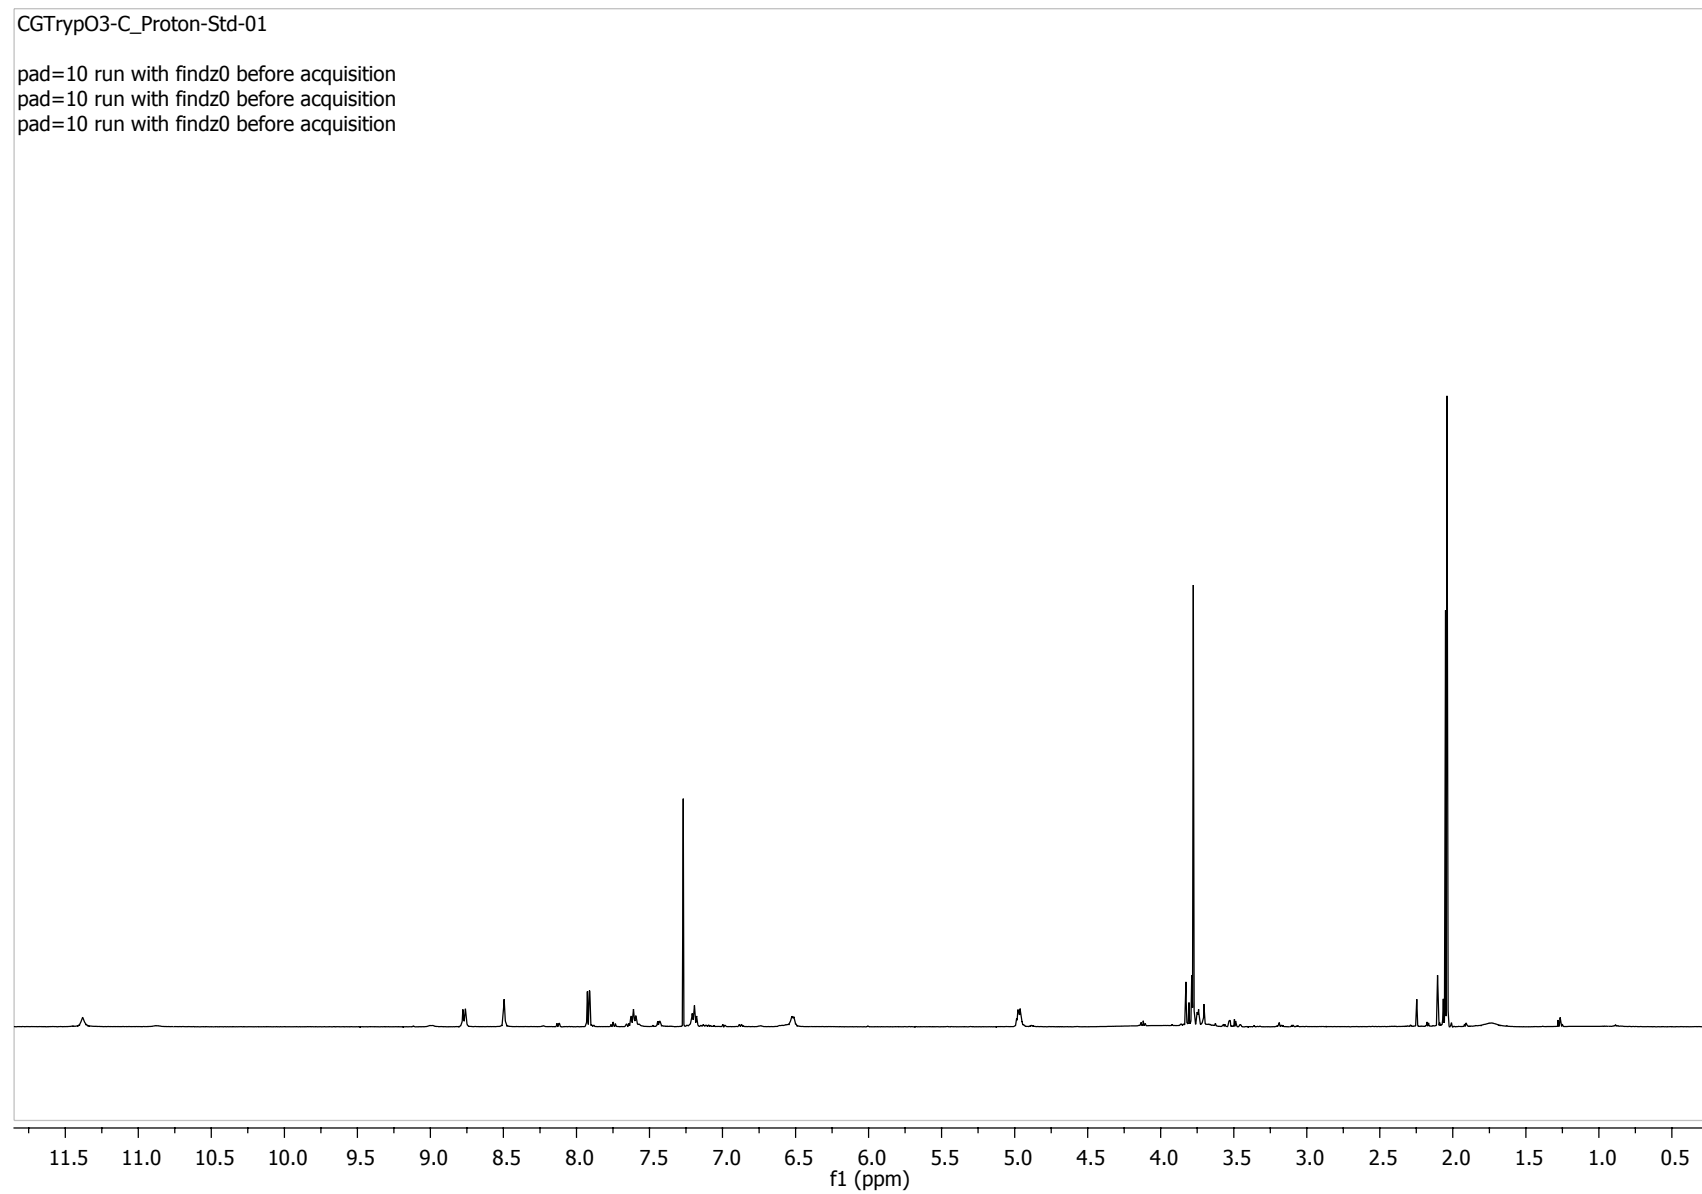

## 2 Crystallographic data

Intensity data were collected with an Oxford Diffraction Sapphire CCD diffractometer using Cu-K $\alpha$  radiation (graphite crystal monochromator  $\lambda = 1.54184$ ), The temperature during the data collections was maintained at 130.0(1). Structure solution,<sup>1</sup> and refinement<sup>2</sup> were implemented within the WingX suite of programs.<sup>3</sup>

Crystal data for **12a**. C<sub>14</sub>H<sub>14</sub>N<sub>4</sub>O<sub>7</sub>,  $M = 350.29$ ,  $T = 130.0(2)$  K,  $\lambda = 1.5418$  Å, Monoclinic, space group P2<sub>1</sub>2<sub>1</sub>2<sub>1</sub>,  $a = 6.3831(14)$ ,  $b = 7.837(3)$   $c = 15.410(3)$ , Å,  $\beta = 90.91(3)^\circ$ ,  $V 770.7(3)$  Å<sup>3</sup>,  $Z = 2$ ,  $D_c = 1.509$  Mg M<sup>-3</sup>  $\mu(\text{Cu-K}\alpha) 1.061$  mm<sup>-1</sup>,  $F(000) = 364$ , crystal size 0.16 x 0.08 x 0.02 mm. 2249 reflections measured, 1784 independent reflections ( $R_{\text{int}} = 0.11$ ) the final R was 0.0570 [ $I > 2\sigma(I)$ ] and  $wR(F^2)$  was 0.0838 (all data).

**Table 1.** Crystal data and structure refinement for **12a**.

|                                        |                                                                |                            |
|----------------------------------------|----------------------------------------------------------------|----------------------------|
| Identification code                    | uta1                                                           |                            |
| Empirical formula                      | C14 H14 N4 O7                                                  |                            |
| Formula weight                         | 350.29                                                         |                            |
| Temperature                            | 130(2) K                                                       |                            |
| Wavelength                             | 1.54184 $\approx$                                              |                            |
| Crystal system                         | Monoclinic                                                     |                            |
| Space group                            | P 1 21 1                                                       |                            |
| Unit cell dimensions                   | $a = 6.3831(14) \approx$                                       | $\alpha = 90^\circ$ .      |
|                                        | $b = 7.837(3) \approx$                                         | $\beta = 90.91(3)^\circ$ . |
|                                        | $c = 15.410(3) \approx$                                        | $\gamma = 90^\circ$ .      |
| Volume                                 | $770.7(3) \approx^3$                                           |                            |
| Z                                      | 2                                                              |                            |
| Density (calculated)                   | 1.509 Mg/m <sup>3</sup>                                        |                            |
| Absorption coefficient                 | 1.061 mm <sup>-1</sup>                                         |                            |
| F(000)                                 | 364                                                            |                            |
| Crystal size                           | 0.1600 x 0.0800 x 0.0200 mm <sup>3</sup>                       |                            |
| Theta range for data collection        | 5.74 to 64.99 $^\circ$ .                                       |                            |
| Index ranges                           | $-3 \leq h \leq 7$ , $-9 \leq k \leq 8$ , $-18 \leq l \leq 16$ |                            |
| Reflections collected                  | 2249                                                           |                            |
| Independent reflections                | 1784 [ $R(\text{int}) = 0.1101$ ]                              |                            |
| Completeness to theta = 64.99 $^\circ$ | 97.6 %                                                         |                            |
| Absorption correction                  | Gaussian                                                       |                            |
| Max. and min. transmission             | 0.979 and 0.860                                                |                            |
| Refinement method                      | Full-matrix least-squares on $F^2$                             |                            |
| Data / restraints / parameters         | 1784 / 1 / 227                                                 |                            |
| Goodness-of-fit on $F^2$               | 0.615                                                          |                            |
| Final R indices [ $I > 2\sigma(I)$ ]   | $R1 = 0.0570$ , $wR2 = 0.0620$                                 |                            |
| R indices (all data)                   | $R1 = 0.2038$ , $wR2 = 0.0838$                                 |                            |
| Absolute structure parameter           | 0.6(7)                                                         |                            |
| Largest diff. peak and hole            | 0.212 and -0.226 e. $\approx^{-3}$                             |                            |

<sup>1</sup> G. M. Sheldrick, 'SHELXS-86; Crystallographic Computing 3', University of Göttingen, Germany, 1986.

<sup>2</sup> G. M. Sheldrick, 'SHELXL-97; A Program for the Refinement of Crystal Structures' University of Göttingen, Germany, 1997.

<sup>3</sup> L. J. Farrugia, *J. Appl. Crystallogr.*, 1999, **32**, 837.

**Table 2.** Atomic coordinates ( $\times 10^4$ ) and equivalent isotropic displacement parameters ( $\approx 2 \times 10^3$ ) for **12a**.  $U(\text{eq})$  is defined as one third of the trace of the orthogonalized  $U_{ij}$  tensor.

|       | x         | y         | z        | U(eq) |
|-------|-----------|-----------|----------|-------|
| O(3)  | 5418(10)  | 1796(10)  | 3188(4)  | 40(2) |
| O(2)  | 2660(11)  | 4336(9)   | 4249(5)  | 45(2) |
| O(1)  | 1387(11)  | 1711(10)  | 4557(5)  | 47(2) |
| O(4)  | 5721(11)  | -150(9)   | 2194(5)  | 44(2) |
| O(7)  | 1775(12)  | 7080(8)   | 2274(5)  | 48(2) |
| O(6)  | 2461(10)  | -1782(8)  | -1465(4) | 35(2) |
| N(2)  | 2754(13)  | 4320(10)  | 1160(6)  | 34(3) |
| N(1)  | 1230(15)  | 4352(10)  | 2606(6)  | 30(3) |
| N(3)  | 4887(15)  | 1076(11)  | 2499(7)  | 44(3) |
| N(4)  | 2454(13)  | -1791(11) | -659(7)  | 34(3) |
| C(9)  | 507(15)   | 2925(14)  | 3155(6)  | 33(3) |
| C(11) | 1587(16)  | 2900(16)  | 4059(6)  | 32(3) |
| C(1)  | 2626(15)  | 2948(15)  | 625(7)   | 26(3) |
| C(7)  | 2916(16)  | 1817(13)  | 2060(7)  | 36(3) |
| C(3)  | 2660(15)  | -167(13)  | 697(7)   | 32(3) |
| C(4)  | 2460(16)  | -127(14)  | -183(7)  | 27(3) |
| C(10) | 1010(16)  | 1320(11)  | 2624(7)  | 32(3) |
| C(6)  | 2518(15)  | 2886(15)  | -272(7)  | 32(3) |
| C(13) | 3555(14)  | 4386(17)  | 5126(7)  | 71(5) |
| C(2)  | 2772(16)  | 1410(13)  | 1116(7)  | 30(3) |
| C(14) | -1120(14) | 6454(13)  | 3203(7)  | 48(3) |
| C(5)  | 2442(15)  | 1373(13)  | -692(7)  | 31(3) |
| C(8)  | 3035(18)  | 3864(11)  | 2064(8)  | 29(3) |
| C(12) | 730(20)   | 6064(14)  | 2678(9)  | 49(4) |
| O(5)  | 2356(11)  | -3143(8)  | -216(5)  | 37(2) |

**Table 3.** Bond lengths [ $\approx$ ] and angles [ $\infty$ ] for **12a**.

---

|                  |           |
|------------------|-----------|
| O(3)-N(3)        | 1.244(10) |
| O(2)-C(11)       | 1.347(12) |
| O(2)-C(13)       | 1.460(10) |
| O(1)-C(11)       | 1.215(12) |
| O(4)-N(3)        | 1.198(10) |
| O(7)-C(12)       | 1.215(14) |
| O(6)-N(4)        | 1.243(10) |
| N(2)-C(1)        | 1.356(13) |
| N(2)-C(8)        | 1.447(12) |
| N(1)-C(12)       | 1.383(12) |
| N(1)-C(8)        | 1.484(12) |
| N(1)-C(9)        | 1.481(12) |
| N(3)-C(7)        | 1.533(12) |
| N(4)-O(5)        | 1.262(10) |
| N(4)-C(4)        | 1.496(12) |
| C(9)-C(10)       | 1.538(12) |
| C(9)-C(11)       | 1.545(12) |
| C(1)-C(6)        | 1.383(14) |
| C(1)-C(2)        | 1.426(14) |
| C(7)-C(2)        | 1.491(14) |
| C(7)-C(10)       | 1.556(13) |
| C(7)-C(8)        | 1.606(11) |
| C(3)-C(4)        | 1.361(13) |
| C(3)-C(2)        | 1.395(13) |
| C(4)-C(5)        | 1.413(13) |
| C(6)-C(5)        | 1.352(13) |
| C(14)-C(12)      | 1.476(14) |
| <hr/>            |           |
| C(11)-O(2)-C(13) | 114.4(9)  |
| C(1)-N(2)-C(8)   | 113.3(8)  |
| C(12)-N(1)-C(8)  | 118.4(10) |
| C(12)-N(1)-C(9)  | 127.8(11) |
| C(8)-N(1)-C(9)   | 112.3(8)  |
| O(4)-N(3)-O(3)   | 125.6(10) |
| O(4)-N(3)-C(7)   | 119.8(10) |
| O(3)-N(3)-C(7)   | 114.6(9)  |
| O(6)-N(4)-O(5)   | 123.1(9)  |
| O(6)-N(4)-C(4)   | 119.0(10) |
| O(5)-N(4)-C(4)   | 117.8(9)  |
| N(1)-C(9)-C(10)  | 104.1(8)  |
| N(1)-C(9)-C(11)  | 112.8(9)  |
| C(10)-C(9)-C(11) | 112.1(9)  |
| O(1)-C(11)-O(2)  | 124.1(9)  |
| O(1)-C(11)-C(9)  | 122.0(11) |
| O(2)-C(11)-C(9)  | 113.8(10) |
| N(2)-C(1)-C(6)   | 129.5(11) |
| N(2)-C(1)-C(2)   | 110.2(8)  |
| C(6)-C(1)-C(2)   | 120.1(12) |
| C(2)-C(7)-N(3)   | 112.8(9)  |
| C(2)-C(7)-C(10)  | 117.1(9)  |
| N(3)-C(7)-C(10)  | 107.6(9)  |

|                  |           |
|------------------|-----------|
| C(2)-C(7)-C(8)   | 102.7(9)  |
| N(3)-C(7)-C(8)   | 109.7(9)  |
| C(10)-C(7)-C(8)  | 106.6(10) |
| C(4)-C(3)-C(2)   | 116.3(11) |
| C(3)-C(4)-C(5)   | 124.9(10) |
| C(3)-C(4)-N(4)   | 117.9(10) |
| C(5)-C(4)-N(4)   | 116.9(9)  |
| C(9)-C(10)-C(7)  | 105.3(8)  |
| C(5)-C(6)-C(1)   | 120.7(12) |
| C(3)-C(2)-C(1)   | 120.1(10) |
| C(3)-C(2)-C(7)   | 130.0(10) |
| C(1)-C(2)-C(7)   | 109.8(9)  |
| C(6)-C(5)-C(4)   | 117.7(10) |
| N(2)-C(8)-N(1)   | 113.1(9)  |
| N(2)-C(8)-C(7)   | 103.8(9)  |
| N(1)-C(8)-C(7)   | 102.8(9)  |
| O(7)-C(12)-N(1)  | 117.8(12) |
| O(7)-C(12)-C(14) | 126.5(11) |
| N(1)-C(12)-C(14) | 115.6(13) |

---

Symmetry transformations used to generate equivalent atoms:

**Table 4.** Anisotropic displacement parameters ( $\approx 2 \times 10^3$ ) for **12a**. The anisotropic displacement factor exponent takes the form:  $-2\pi^2 [ h^2 a^* 2 U^{11} + \dots + 2 h k a^* b^* U^{12} ]$

|       | U11    | U22   | U33    | U23    | U13    | U12    |
|-------|--------|-------|--------|--------|--------|--------|
| O(3)  | 46(5)  | 33(5) | 40(5)  | 9(5)   | 2(4)   | 1(4)   |
| O(2)  | 44(5)  | 44(5) | 45(5)  | -3(4)  | -15(5) | -18(4) |
| O(1)  | 66(6)  | 36(5) | 39(5)  | 2(5)   | 3(4)   | -8(4)  |
| O(4)  | 46(5)  | 24(4) | 62(6)  | 3(5)   | 0(4)   | -4(4)  |
| O(7)  | 76(6)  | 13(4) | 55(6)  | 1(4)   | 9(5)   | 5(4)   |
| O(6)  | 50(5)  | 22(4) | 32(5)  | -7(4)  | 2(4)   | 0(4)   |
| N(2)  | 38(7)  | 23(5) | 41(7)  | 2(5)   | 3(6)   | -1(5)  |
| N(1)  | 31(6)  | 31(5) | 29(6)  | -4(5)  | -11(5) | 0(5)   |
| N(3)  | 50(8)  | 32(6) | 51(8)  | 8(6)   | 12(6)  | -5(5)  |
| N(4)  | 9(6)   | 32(6) | 61(8)  | -17(6) | 4(5)   | -13(4) |
| C(9)  | 40(8)  | 29(6) | 31(7)  | 2(7)   | -1(6)  | 1(7)   |
| C(11) | 36(8)  | 40(7) | 21(6)  | -16(7) | 5(6)   | -4(7)  |
| C(1)  | 19(7)  | 24(5) | 36(7)  | 7(6)   | -10(5) | 3(6)   |
| C(7)  | 23(7)  | 19(5) | 64(9)  | 4(7)   | -30(7) | 2(5)   |
| C(3)  | 42(8)  | 17(5) | 37(7)  | -4(6)  | -9(6)  | 4(6)   |
| C(4)  | 27(7)  | 19(5) | 36(8)  | -11(6) | -3(6)  | 7(5)   |
| C(10) | 42(8)  | 17(6) | 38(8)  | -3(6)  | 15(7)  | -13(6) |
| C(6)  | 40(8)  | 26(6) | 30(8)  | -4(7)  | -6(6)  | 0(6)   |
| C(13) | 87(11) | 64(9) | 61(11) | -2(9)  | -32(9) | -30(9) |
| C(2)  | 25(8)  | 30(7) | 36(8)  | -11(6) | 2(6)   | 5(6)   |
| C(14) | 59(8)  | 22(5) | 63(8)  | -8(6)  | 3(7)   | 4(6)   |
| C(5)  | 32(7)  | 45(7) | 17(6)  | 4(6)   | -10(5) | 3(6)   |
| C(8)  | 28(8)  | 10(5) | 49(8)  | -10(5) | -1(7)  | -7(5)  |
| C(12) | 51(10) | 34(7) | 60(10) | -13(7) | -19(8) | 22(7)  |
| O(5)  | 62(6)  | 15(4) | 36(5)  | 1(4)   | 12(4)  | -1(4)  |

**Table 5.** Hydrogen coordinates ( $\times 10^4$ ) and isotropic displacement parameters ( $\approx 2 \times 10^3$ ) for **12a**.

|        | x     | y     | z     | U(eq) |
|--------|-------|-------|-------|-------|
| H(2)   | 2675  | 5357  | 979   | 41    |
| H(9)   | -1013 | 3011  | 3225  | 40    |
| H(3)   | 2718  | -1189 | 1003  | 38    |
| H(10A) | -179  | 998   | 2259  | 39    |
| H(10B) | 1362  | 372   | 3004  | 39    |
| H(6)   | 2498  | 3896  | -589  | 39    |
| H(13A) | 4288  | 5444  | 5211  | 106   |
| H(13B) | 4513  | 3452  | 5203  | 106   |
| H(13C) | 2453  | 4296  | 5540  | 106   |
| H(14A) | -753  | 6376  | 3808  | 72    |
| H(14B) | -2215 | 5652  | 3069  | 72    |
| H(14C) | -1599 | 7589  | 3073  | 72    |
| H(5)   | 2379  | 1321  | -1294 | 38    |
| H(8)   | 4368  | 4283  | 2305  | 35    |
